# Supplementary material for: Azospirillum brasilense improves rice growth under salt stress by regulating the expression of key genes involved in salt stress response, abscisic acid signaling, and nutrient transport, among others
Source: Front Agron. Author manuscript; Available in PMC 2024 Jan 12. (PMC10785826; doi:10.3389/fagro.2023.1216503)
Supplement: Supp Table 2 — SUPPLEMENTARY TABLE 2 List of differentially expressed genes (DEGs) in rice roots in response to 200 mM NaCl salt, seven days post treatment. The table contains the gene annotations, their log2 fold change values, and corresponding statistics. [file NIHMS1956026-supplement-Supp_Table_2.xlsx]

## Sheet: Supplementary Table 2
List of differentially expressed genes (DEGs) in rice roots in response to 200 mM NaCl salt, seven days post treatment.
gene	locus	mean_Cnt	mean_Salt	log2FC	test_stat	p_value	FDR	annot
LOC_Os01g06630	Chr1:3124350-3125325	0	1.39494	Inf	NA	5e-05	0.00072992	small hydrophilic plant seed protein, putative, expressed
LOC_Os01g06940	Chr1:3288322-3288890	0	1.39141	Inf	NA	0.00015	0.00189973	POEI33 - Pollen Ole e I allergen and extensin family protein precursor, expressed
LOC_Os01g15130	Chr1:8490581-8492348	0	0.757481	Inf	NA	5e-05	0.00072992	hydrolase, alpha/beta fold family domain containing protein, expressed
LOC_Os01g49090	Chr1:28218456-28220215	0	0.71645	Inf	NA	0.00015	0.00189973	retrotransposon protein, putative, unclassified, expressed
LOC_Os01g50070	Chr1:28768975-28769426	0	5.86044	Inf	NA	0.0089	0.0492583	multidrug resistance protein 1, putative, expressed
LOC_Os01g52830	Chr1:30386373-30387917	0	5.39549	Inf	NA	5e-05	0.00072992	DUF1264 domain containing protein, putative, expressed
LOC_Os01g61700	Chr1:35692799-35693786	0	1.11489	Inf	NA	5e-05	0.00072992	ATP-dependent Clp protease adaptor protein ClpS containing protein, expressed
LOC_Os01g68290	Chr1:39679523-39680147	0	1.21896	Inf	NA	5e-05	0.00072992	expressed protein
LOC_Os02g01810	Chr2:447896-449824	0	0.823486	Inf	NA	0.00015	0.00189973	expressed protein
LOC_Os02g08000	Chr2:4190116-4190500	0	1.69592	Inf	NA	0.0054	0.0340684	expressed protein
LOC_Os02g12530	Chr2:6553793-6554309	0	0.887	Inf	NA	5e-05	0.00072992	cytochrome P450 71D6, putative, expressed
LOC_Os02g14080	Chr2:7689509-7689752	0	24.5976	Inf	NA	0.0068	0.0404568	expressed protein
LOC_Os02g30910	Chr2:18454403-18457136	0	1.4014	Inf	NA	5e-05	0.00072992	nodulin MtN3 family protein, putative, expressed
LOC_Os02g42470	Chr2:25550572-25550818	0	14.297	Inf	NA	0.00505	0.0323837	expressed protein
LOC_Os03g01614	Chr3:388273-388906	0	0.728792	Inf	NA	0.0002	0.00243581	expressed protein
LOC_Os03g27690	Chr3:15873672-15873981	0	5.66725	Inf	NA	0.0055	0.0345254	expressed protein
LOC_Os03g41320	Chr3:22971490-22971736	0	17.6923	Inf	NA	0.00575	0.0356623	expressed protein
LOC_Os03g48780	Chr3:27790976-27792047	0	24.0125	Inf	NA	5e-05	0.00072992	Cupin domain containing protein, expressed
LOC_Os04g41640	Chr4:24692676-24693326	0	13.8745	Inf	NA	5e-05	0.00072992	HEV2 - Hevein family protein precursor, expressed
LOC_Os04g47750	Chr4:28330493-28330968	0	1.06314	Inf	NA	0.0025	0.0190176	transposon protein, putative, Pong sub-class, expressed
LOC_Os04g58790	Chr4:34972047-34972293	0	16.5708	Inf	NA	0.0069	0.0408679	expressed protein
LOC_Os05g02920	Chr5:1069040-1069699	0	2.09254	Inf	NA	5e-05	0.00072992	expressed protein
LOC_Os05g04870	Chr5:2345387-2346843	0	0.988797	Inf	NA	5e-05	0.00072992	oxidoreductase, short chain dehydrogenase/reductase family protein, putative, expressed
LOC_Os05g04930	Chr5:2375084-2376419	0	0.406632	Inf	NA	5e-05	0.00072992	transferase family protein, putative, expressed
LOC_Os05g11610	Chr5:6576137-6576715	0	1.87421	Inf	NA	5e-05	0.00072992	expressed protein
LOC_Os05g12440	Chr5:7149661-7150066	0	3.16446	Inf	NA	0.0001	0.00135054	expressed protein
LOC_Os05g20030	Chr5:11710832-11711624	0	0.921416	Inf	NA	5e-05	0.00072992	DUF617 domain containing protein, expressed
LOC_Os05g36330	Chr5:21512610-21512814	0	138.243	Inf	NA	0.00445	0.0295056	expressed protein
LOC_Os05g49960	Chr5:28652223-28652700	0	1.27326	Inf	NA	0.00035	0.00391428	expressed protein
LOC_Os06g11260	Chr6:5905263-5906018	0	0.766758	Inf	NA	0.0001	0.00135054	12-oxophytodienoate reductase 2, putative, expressed
LOC_Os06g32200	Chr6:18751698-18753692	0	2.92702	Inf	NA	5e-05	0.00072992	THION8 - Plant thionin family protein precursor, putative, expressed
LOC_Os06g35020	Chr6:20365070-20370995	0	0.60625	Inf	NA	5e-05	0.00072992	expressed protein
LOC_Os06g50809	Chr6:30748990-30749677	0	1.24449	Inf	NA	5e-05	0.00072992	UPF0496 protein 2, putative, expressed
LOC_Os07g12550	Chr7:7163148-7165291	0	0.666858	Inf	NA	5e-05	0.00072992	expressed protein
LOC_Os07g14140	Chr7:8064977-8066298	0	1.13574	Inf	NA	5e-05	0.00072992	LTPL54 - Protease inhibitor/seed storage/LTP family protein precursor, putative, expressed
LOC_Os07g15920	Chr7:9249833-9250283	0	1.06674	Inf	NA	0.00575	0.0356623	expressed protein
LOC_Os07g37690	Chr7:22597655-22599363	0	0.644063	Inf	NA	5e-05	0.00072992	UDP-glucoronosyl and UDP-glucosyl transferase domain containing protein, expressed
LOC_Os07g40170	Chr7:24101430-24102068	0	1.54078	Inf	NA	0.00045	0.00480686	expressed protein
LOC_Os08g07620	Chr8:4278358-4278688	0	2.18312	Inf	NA	0.0044	0.0292719	expressed protein
LOC_Os08g32930	Chr8:20423733-20427791	0	0.880573	Inf	NA	5e-05	0.00072992	expressed protein
LOC_Os08g40070	Chr8:25370363-25371037	0	5.32099	Inf	NA	0.00015	0.00189973	expressed protein
LOC_Os09g07100	Chr9:3446666-3447026	0	1.90233	Inf	NA	0.00705	0.0416011	hypothetical protein
LOC_Os09g36680	Chr9:21155955-21157945	0	64.2105	Inf	NA	5e-05	0.00072992	ribonuclease T2 family domain containing protein, expressed
LOC_Os10g08950	Chr10:4842997-4843747	0	1.27229	Inf	NA	0.0044	0.0292719	expressed protein
LOC_Os10g39610	Chr10:21168486-21169232	0	27.298	Inf	NA	5e-05	0.00072992	expressed protein
LOC_Os10g40440	Chr10:21662436-21663224	0	0.856202	Inf	NA	5e-05	0.00072992	LTPL140 - Protease inhibitor/seed storage/LTP family protein precursor, expressed
LOC_Os11g09470	Chr11:5076336-5076892	0	1.32051	Inf	NA	0.0044	0.0292719	expressed protein
LOC_Os03g48770	Chr3:27788050-27788913	0.221201	21.4036	6.59636	3.77683	0.0068	0.0404568	Cupin domain containing protein, expressed
LOC_Os06g23350	Chr6:13630100-13631415	0.439783	32.7639	6.21917	6.13373	5e-05	0.00072992	late embryogenesis abundant protein D-34, putative, expressed
LOC_Os09g09040	Chr9:4813299-4813923	0.480706	27.7689	5.85217	5.70515	0.0065	0.0391216	expressed protein
LOC_Os11g32890	Chr11:19430334-19431158	0.453873	20.3828	5.48892	5.4226	0.00035	0.00391428	expressed protein
LOC_Os07g15959	Chr7:9278825-9282985	1.13941	49.4073	5.43837	5.78955	5e-05	0.00072992	expressed protein
LOC_Os03g51350	Chr3:29386199-29388063	1.8949	76.6649	5.33837	7.70638	5e-05	0.00072992	expressed protein
LOC_Os06g24430	Chr6:14315895-14316519	0.972695	33.2361	5.09462	5.08841	0.00025	0.00295117	expressed protein
LOC_Os03g21260	Chr3:12145868-12150203	0.129602	4.26934	5.04185	3.89701	0.0007	0.00697948	2,3-bisphosphoglycerate-independent phosphoglycerate mutase, putative, expressed
LOC_Os08g23870	Chr8:14450165-14451006	0.34681	10.5736	4.93017	3.84036	0.00085	0.00814427	late embryogenesis abundant group 1, putative, expressed
LOC_Os11g26790	Chr11:15342563-15343857	9.95337	287.023	4.84984	9.13066	5e-05	0.00072992	dehydrin, putative, expressed
LOC_Os03g22590	Chr3:13004685-13008130	6.16929	172.716	4.80715	11.3813	5e-05	0.00072992	nodulin MtN3 family protein, putative, expressed
LOC_Os01g54030	Chr1:31076570-31088007	0.449964	12.5189	4.79815	4.18355	0.00035	0.00391428	NADP-dependent malic enzyme, putative, expressed
LOC_Os05g15880	Chr5:8959414-8960578	2.48841	66.0279	4.72978	7.90358	5e-05	0.00072992	glycosyl hydrolase, putative, expressed
LOC_Os04g31710	Chr4:18994441-18995691	1.34316	33.0465	4.62079	5.97437	5e-05	0.00072992	expressed protein
LOC_Os05g33140	Chr5:19435357-19436734	1.07886	26.1062	4.59681	6.05385	5e-05	0.00072992	CHIT5 - Chitinase family protein precursor, expressed
LOC_Os10g13850	Chr10:7529341-7530484	0.758806	18.263	4.58905	5.63313	5e-05	0.00072992	POEI17 - Pollen Ole e I allergen and extensin family protein precursor, expressed
LOC_Os01g19770	Chr1:11221764-11223653	0.226854	5.45655	4.58815	3.62722	0.0005	0.0052468	mitochondrial import inner membrane translocase subunit Tim17, putative, expressed
LOC_Os07g46330	Chr7:27630645-27633384	0.332641	7.85379	4.56135	4.39591	0.0001	0.00135054	uncharacterized UPF0114 domain containing protein, expressed
LOC_Os10g21790	Chr10:11185624-11186271	5.93009	134.277	4.50101	6.24998	5e-05	0.00072992	dehydration stress-induced protein, putative, expressed
LOC_Os04g49980	Chr4:29811953-29812728	2.90105	63.7323	4.45738	7.59437	5e-05	0.00072992	late embryogenesis abundant group 1, putative, expressed
LOC_Os04g52110	Chr4:30950938-30952114	0.386753	8.42605	4.44537	4.11224	5e-05	0.00072992	late embryogenesis abundant protein, group 3, putative, expressed
LOC_Os08g30540	Chr8:18797924-18798975	1.22069	26.5466	4.44276	4.54515	0.00025	0.00295117	expressed protein
LOC_Os07g04990	Chr7:2193806-2197052	0.12138	2.62937	4.43711	3.582	0.0005	0.0052468	oxidoreductase, aldo/keto reductase family protein, putative, expressed
LOC_Os10g29470	Chr10:15303900-15309302	0.467756	9.92445	4.40716	4.86435	5e-05	0.00072992	dehydrogenase, putative, expressed
LOC_Os02g04780	Chr2:2192207-2193869	0.152503	3.07222	4.33237	3.41674	0.00165	0.013809	expressed protein
LOC_Os06g48210	Chr6:29163788-29166834	0.458814	8.92151	4.28131	5.71489	5e-05	0.00072992	DEAD-box ATP-dependent RNA helicase, putative, expressed
LOC_Os01g24700	Chr1:13899522-13900729	0.456541	8.56693	4.22996	3.69977	0.0079	0.0451293	expressed protein
LOC_Os04g27980	Chr4:16519830-16521452	40.4209	753.951	4.2213	12.2002	5e-05	0.00072992	glycosyl hydrolase, putative, expressed
LOC_Os08g34390	Chr8:21591001-21592039	0.544958	10.1057	4.21288	3.9481	5e-05	0.00072992	retrotransposon protein, putative, unclassified, expressed
LOC_Os07g23660	Chr7:13366415-13367542	62.961	1156.61	4.1993	9.69301	5e-05	0.00072992	retrotransposon protein, putative, unclassified, expressed
LOC_Os12g15530	Chr12:8869429-8874715	0.460495	8.26559	4.16586	5.58997	5e-05	0.00072992	retrotransposon protein, putative, unclassified, expressed
LOC_Os04g09390	Chr4:5005076-5006210	41.752	737.939	4.14359	11.0847	5e-05	0.00072992	HEV3 - Hevein family protein precursor, expressed
LOC_Os11g26750	Chr11:15320187-15321526	14.101	238.916	4.08264	8.73772	5e-05	0.00072992	dehydrin, putative, expressed
LOC_Os07g05360	Chr7:2453959-2456611	2.65113	41.6871	3.97492	8.7244	5e-05	0.00072992	photosystem II 10 kDa polypeptide, chloroplast precursor, putative, expressed
LOC_Os05g47730	Chr5:27345714-27346293	10.9968	170.895	3.95796	7.53408	5e-05	0.00072992	LTPL153 - Protease inhibitor/seed storage/LTP family protein precursor, expressed
LOC_Os10g20610	Chr10:10390878-10396620	0.617853	9.32589	3.91591	6.01885	5e-05	0.00072992	laccase-15 precursor, putative, expressed
LOC_Os10g09850	Chr10:5325562-5329971	2.29538	33.8043	3.8804	7.4391	5e-05	0.00072992	EF hand family protein, putative, expressed
LOC_Os03g26490	Chr3:15127251-15128249	0.469827	6.86903	3.8699	4.04013	0.00895	0.049443	expressed protein
LOC_Os02g02230	Chr2:712585-715746	3.09043	43.2189	3.80578	7.95406	5e-05	0.00072992	cytochrome P450, putative, expressed
LOC_Os11g26780	Chr11:15336033-15337163	3.74379	51.6073	3.785	6.65237	5e-05	0.00072992	dehydrin, putative, expressed
LOC_Os06g46740	Chr6:28388295-28389574	2.3633	32.3375	3.77433	6.50072	5e-05	0.00072992	early nodulin 20 precursor, putative, expressed
LOC_Os10g19160	Chr10:9757082-9760617	0.185125	2.48074	3.7442	4.1271	5e-05	0.00072992	receptor kinase, putative, expressed
LOC_Os01g64670	Chr1:37519522-37524040	0.878278	11.5283	3.71436	1.76172	0.00035	0.00391428	soluble inorganic pyrophosphatase, putative, expressed
LOC_Os01g70520	Chr1:40842241-40848348	0.682961	8.95086	3.71215	4.93634	5e-05	0.00072992	Os1bglu5 - beta-glucosidase homologue, similar to G. max isohydroxyurate hydrolase, expressed
LOC_Os05g50380	Chr5:28871793-28877277	10.0569	122.52	3.60676	9.40026	5e-05	0.00072992	glucose-1-phosphate adenylyltransferase large subunit, chloroplast precursor, putative, expressed
LOC_Os05g39250	Chr5:23013502-23014354	4.28907	52.0308	3.60063	5.98108	5e-05	0.00072992	phosphatidylethanolamine-binding protein, putative, expressed
LOC_Os02g53130	Chr2:32513738-32517155	0.725581	8.79576	3.5996	5.55402	5e-05	0.00072992	nitrate reductase, putative, expressed
LOC_Os03g47610	Chr3:26952047-26959200	0.535796	6.37968	3.57373	5.27948	5e-05	0.00072992	thiamine biosynthesis protein thiC, putative, expressed
LOC_Os02g06410	Chr2:3204085-3206334	0.320987	3.73317	3.53981	3.80419	0.00015	0.00189973	CBS domain containing membrane protein, putative, expressed
LOC_Os03g16920	Chr3:9411493-9416082	2.71592	31.498	3.53575	6.85256	5e-05	0.00072992	DnaK family protein, putative, expressed
LOC_Os09g31502	Chr9:19011573-19014398	0.158097	1.82808	3.53145	2.70033	0.0016	0.013514	dehydrogenase, putative, expressed
LOC_Os07g10840	Chr7:5890557-5894135	52.3323	598.936	3.51663	8.60245	5e-05	0.00072992	uncharacterized glycosyltransferase, putative, expressed
LOC_Os03g48750	Chr3:27779085-27780096	0.316777	3.61932	3.51418	3.25539	0.004	0.0273914	Cupin domain containing protein, expressed
LOC_Os04g41680	Chr4:24708715-24709910	6.29311	69.8245	3.47189	7.42101	5e-05	0.00072992	CHIT3 - Chitinase family protein precursor, expressed
LOC_Os05g08480	Chr5:4626219-4628310	0.237689	2.61705	3.46079	2.84416	0.0011	0.010008	cytokinin-O-glucosyltransferase 1, putative, expressed
LOC_Os05g13490	Chr5:7478021-7479351	1.8378	20.1694	3.45612	4.87686	5e-05	0.00072992	BURP domain containing protein, expressed
LOC_Os05g03130	Chr5:1246285-1247010	1.3735	14.2829	3.37836	4.03625	5e-05	0.00072992	OsRCI2-7 - Putative low temperature and salt responsive protein, expressed
LOC_Os01g28450	Chr1:15934490-15935319	0.360918	3.73721	3.37222	2.58137	0.00205	0.01633	SCP-like extracellular protein, expressed
LOC_Os01g06740	Chr1:3188756-3190330	2.81405	28.9335	3.36202	6.43864	5e-05	0.00072992	ribosome inactivating protein, putative, expressed
LOC_Os06g02040	Chr6:593556-594233	0.878911	8.81411	3.32603	3.12646	0.00025	0.00295117	late embryogenesis abundant group 1, putative, expressed
LOC_Os01g47300	Chr1:27032999-27035765	4.09158	40.0085	3.28958	4.80304	5e-05	0.00072992	retrotransposon protein, putative, unclassified, expressed
LOC_Os11g03390	Chr11:1280032-1281762	0.863078	8.43428	3.2887	3.6019	5e-05	0.00072992	FHA domain containing protein, putative, expressed
LOC_Os07g23640	Chr7:13354096-13355297	153.935	1500.6	3.28514	7.40177	5e-05	0.00072992	retrotransposon protein, putative, Ty3-gypsy subclass, expressed
LOC_Os08g04560	Chr8:2268446-2270568	2.70551	26.0741	3.26864	7.41588	5e-05	0.00072992	decarboxylase, putative, expressed
LOC_Os09g15480	Chr9:9476394-9478845	0.454922	4.34439	3.25546	3.23306	0.00025	0.00295117	Ser/Thr-rich protein T10 in DGCR region, putative, expressed
LOC_Os06g12370	Chr6:6701246-6704416	0.132983	1.26778	3.25299	2.4328	0.0017	0.0141133	OsFtsH6 FtsH protease, homologue of AtFtsH6, expressed
LOC_Os02g03200	Chr2:1263499-1266099	0.442589	4.20656	3.2486	5.11263	5e-05	0.00072992	FAD-binding and arabino-lactone oxidase domains containing protein, putative, expressed
LOC_Os11g26570	Chr11:15223323-15224819	2.18601	20.5141	3.23024	5.45642	5e-05	0.00072992	dehydrin, putative, expressed
LOC_Os05g28210	Chr5:16518573-16519496	2.99845	28.1245	3.22954	4.86024	5e-05	0.00072992	small hydrophilic plant seed protein, putative, expressed
LOC_Os03g61160	Chr3:34739005-34740655	5.46511	51.2206	3.2284	7.26562	5e-05	0.00072992	expressed protein
LOC_Os04g41620	Chr4:24687706-24689307	20.3738	190.346	3.22384	7.85821	5e-05	0.00072992	CHIT2 - Chitinase family protein precursor, expressed
LOC_Os11g26760	Chr11:15327767-15328657	2.53382	23.5694	3.21753	4.81812	5e-05	0.00072992	dehydrin, putative, expressed
LOC_Os05g31670	Chr5:18429323-18430293	9.4769	87.7279	3.21055	7.2234	5e-05	0.00072992	AWPM-19-like membrane family protein, putative, expressed
LOC_Os01g12660	Chr1:6970860-6976710	1.09958	10.1346	3.20426	6.22631	5e-05	0.00072992	AAA-type ATPase family protein, putative, expressed
LOC_Os07g22930	Chr7:12916276-12924325	4.20929	38.5463	3.19494	8.07692	5e-05	0.00072992	starch synthase, putative, expressed
LOC_Os09g34230	Chr9:20214375-20216181	0.80463	7.24817	3.17122	4.82173	5e-05	0.00072992	UDP-glucoronosyl/UDP-glucosyl transferase, putative, expressed
LOC_Os06g31280	Chr6:18202172-18202883	32.1526	289.395	3.17003	5.8791	5e-05	0.00072992	THION1 - Plant thionin family protein precursor, putative, expressed
LOC_Os04g33920	Chr4:20543120-20544485	56.1498	499.457	3.15301	8.37209	5e-05	0.00072992	LTPL102 - Protease inhibitor/seed storage/LTP family protein precursor, expressed
LOC_Os02g58150	Chr2:35584960-35589249	2.99387	26.5742	3.14994	6.23006	5e-05	0.00072992	expressed protein
LOC_Os12g32610	Chr12:19675352-19676314	0.805099	7.02199	3.12464	2.92944	0.00035	0.00391428	expressed protein
LOC_Os01g61610	Chr1:35636302-35641236	0.189587	1.62295	3.09768	2.47189	0.0018	0.0147583	flavonol synthase/flavanone 3-hydroxylase, putative, expressed
LOC_Os02g11110	Chr2:5954999-5957302	0.712542	6.03996	3.08349	3.92618	5e-05	0.00072992	flavonol-3-O-glycoside-7-O-glucosyltransferase 1, putative, expressed
LOC_Os12g12080	Chr12:6610813-6624708	5.72313	47.8541	3.06377	5.67912	5e-05	0.00072992	retrotransposon protein, putative, Ty3-gypsy subclass, expressed
LOC_Os05g44340	Chr5:25803529-25807160	0.319823	2.67134	3.06222	3.98073	5e-05	0.00072992	heat shock protein 101, putative, expressed
LOC_Os09g30490	Chr9:18618051-18618801	0.700171	5.82669	3.0569	2.45263	0.00205	0.01633	EF hand family protein, expressed
LOC_Os03g07180	Chr3:3674146-3679971	2.31579	19.2012	3.05162	3.90779	5e-05	0.00072992	embryonic protein DC-8, putative, expressed
LOC_Os05g46480	Chr5:26927606-26928902	34.7571	287.627	3.04882	7.07857	5e-05	0.00072992	late embryogenesis abundant protein, group 3, putative, expressed
LOC_Os07g34006	Chr7:20313829-20316226	0.574814	4.68334	3.02637	3.81231	5e-05	0.00072992	transporter family protein, putative, expressed
LOC_Os06g06560	Chr6:3079058-3086808	3.92574	31.8925	3.02218	7.49382	5e-05	0.00072992	starch synthase, putative, expressed
LOC_Os12g26960	Chr12:15788560-15789163	37.0896	298.704	3.00963	7.34866	5e-05	0.00072992	THION34 - Plant thionin family protein precursor, expressed
LOC_Os01g67120	Chr1:38961302-38966131	2.14393	17.2354	3.00705	5.48475	5e-05	0.00072992	rhodanese-like domain containing protein, putative, expressed
LOC_Os11g42200	Chr11:25423700-25426214	5.07128	40.7571	3.00663	7.2314	5e-05	0.00072992	laccase precursor protein, putative, expressed
LOC_Os01g47290	Chr1:27031778-27032719	4.21062	33.7904	3.00451	4.85624	5e-05	0.00072992	expressed protein
LOC_Os11g06690	Chr11:3256398-3261237	0.100182	0.803	3.00278	2.38672	0.00435	0.0291019	serine esterase family protein, putative, expressed
LOC_Os12g17320	Chr12:9915291-9922660	0.637482	5.09795	2.99946	3.96594	5e-05	0.00072992	polyprenyl synthetase, putative, expressed
LOC_Os03g20680	Chr3:11699261-11700672	1.29706	10.3623	2.99803	4.80575	5e-05	0.00072992	late embryogenesis abundant protein 1, putative, expressed
LOC_Os09g11170	Chr9:6195157-6196917	1.02017	8.13809	2.99588	3.93013	5e-05	0.00072992	protein binding protein, putative, expressed
LOC_Os02g51820	Chr2:31747711-31754456	0.528672	4.18018	2.98312	1.99695	0.00445	0.0295056	expressed protein
LOC_Os01g42090	Chr1:23864680-23867313	0.629258	4.86938	2.95201	2.77945	0.00475	0.0309602	nodulin MtN3 family protein, putative, expressed
LOC_Os03g55090	Chr3:31332395-31339163	6.03469	46.639	2.95019	8.11382	5e-05	0.00072992	alpha-glucan phosphorylast isozyme, putative, expressed
LOC_Os06g07220	Chr6:3455732-3456811	4.17808	31.9608	2.93539	5.91166	5e-05	0.00072992	LTPL128 - Protease inhibitor/seed storage/LTP family protein precursor, expressed
LOC_Os02g57010	Chr2:34922500-34924811	0.616686	4.70897	2.9328	3.06107	0.0001	0.00135054	RNA recognition motif containing protein, putative, expressed
LOC_Os01g71624	Chr1:41495706-41498656	12.0773	91.9279	2.9282	5.701	5e-05	0.00072992	expressed protein
LOC_Os07g37920	Chr7:22755047-22757691	0.135589	1.021	2.91267	2.33588	0.00385	0.0265706	no apical meristem protein, putative, expressed
LOC_Os03g03910	Chr3:1787647-1790957	0.900792	6.76694	2.90924	3.91909	5e-05	0.00072992	catalase domain containing protein, expressed
LOC_Os06g48300	Chr6:29208085-29210947	6.27485	47.0064	2.9052	6.50443	5e-05	0.00072992	protein phosphatase 2C, putative, expressed
LOC_Os04g10690	Chr4:5811322-5813082	0.264341	1.97404	2.90068	2.6901	0.00125	0.0110436	inorganic phosphate transporter, putative, expressed
LOC_Os06g13720	Chr6:7602363-7605812	13.4832	100.561	2.89883	7.49197	5e-05	0.00072992	dehydrogenase E1 component domain containing protein, expressed
LOC_Os01g19740	Chr1:11202594-11203335	11.1466	82.806	2.89313	5.30924	5e-05	0.00072992	calvin cycle protein CP12, putative, expressed
LOC_Os12g42220	Chr12:26194508-26195982	1.6339	12.0772	2.8859	4.79013	5e-05	0.00072992	expressed protein
LOC_Os03g19290	Chr3:10848473-10850026	5.52306	40.3797	2.87009	5.02959	5e-05	0.00072992	mitochondrial import inner membrane translocase subunit Tim17, putative, expressed
LOC_Os02g15250	Chr2:8516599-8518271	0.12181	0.889466	2.8683	2.48075	0.0051	0.032634	late embryogenesis abundant domain-containing protein, putative, expressed
LOC_Os02g15800	Chr2:8927816-8928740	0.425644	3.07659	2.85361	2.43642	0.0041	0.0278678	expressed protein
LOC_Os01g58049	Chr1:33578191-33579131	0.291314	2.09133	2.84378	2.09157	0.0084	0.0471819	photosystem I assembly protein ycf4, putative, expressed
LOC_Os03g36279	Chr3:20123675-20125252	0.298844	2.12519	2.83012	2.51305	0.0042	0.0284177	retrotransposon protein, putative, Ty3-gypsy subclass, expressed
LOC_Os11g10590	Chr11:5808750-5809017	31.1665	221.427	2.82876	3.05371	0.0011	0.010008	expressed protein
LOC_Os08g06210	Chr8:3425735-3428074	0.896668	6.36128	2.82667	2.0862	0.0068	0.0404568	expressed protein
LOC_Os01g21240	Chr1:11855551-11858974	0.128801	0.913649	2.82649	2.36704	0.0072	0.0422038	MLA6 protein, putative, expressed
LOC_Os02g54140	Chr2:33179485-33180458	3.27701	23.2346	2.82582	4.50397	5e-05	0.00072992	hsp20/alpha crystallin family protein, putative, expressed
LOC_Os02g46180	Chr2:28136328-28137459	5.85323	41.4758	2.82497	6.1403	5e-05	0.00072992	DUF581 domain containing protein, expressed
LOC_Os02g54870	Chr2:33604347-33606002	0.415166	2.92773	2.81802	2.89757	0.0008	0.00773994	expressed protein
LOC_Os06g10920	Chr6:5705126-5707910	0.196709	1.3809	2.81147	2.91535	0.00665	0.039773	xyloglucan fucosyltransferase, putative, expressed
LOC_Os01g43851	Chr1:25119733-25121927	0.667913	4.6822	2.80945	3.95842	5e-05	0.00072992	cytochrome P450 72A1, putative, expressed
LOC_Os06g01850	Chr6:477097-481669	1.83197	12.8253	2.80753	2.39678	0.0056	0.034978	ferredoxin--NADP reductase, chloroplast precursor, putative, expressed
LOC_Os01g10310	Chr1:5424058-5424571	1.60712	11.0994	2.78793	3.19912	0.00235	0.0181608	expressed protein
LOC_Os07g30670	Chr7:18149080-18150712	0.607824	4.16686	2.77723	2.45407	0.00045	0.00480686	2Fe-2S iron-sulfur cluster binding domain containing protein, expressed
LOC_Os11g47970	Chr11:28934293-28936340	11.7469	80.1691	2.77077	6.2093	5e-05	0.00072992	AAA-type ATPase family protein, putative, expressed
LOC_Os06g30860	Chr6:17915922-17917083	1.91489	13.0244	2.76588	4.16147	5e-05	0.00072992	WRKY31, expressed
LOC_Os10g36180	Chr10:19346333-19348306	4.30946	29.0503	2.75297	5.73175	5e-05	0.00072992	expressed protein
LOC_Os11g43790	Chr11:26453035-26453881	9.22964	62.1605	2.75165	5.32595	5e-05	0.00072992	DUF581 domain containing protein, expressed
LOC_Os05g31020	Chr5:18016616-18020387	3.30245	22.2189	2.75018	5.81551	5e-05	0.00072992	eukaryotic peptide chain release factor subunit 1-1, putative, expressed
LOC_Os05g49730	Chr5:28523661-28526025	1.0284	6.86829	2.73954	4.13191	5e-05	0.00072992	protein phosphatase 2C, putative, expressed
LOC_Os01g24820	Chr1:13979884-13983744	0.112791	0.748751	2.73083	2.16924	0.00665	0.039773	NB-ARC domain containing protein, expressed
LOC_Os03g46060	Chr3:26032939-26033802	110.057	729.516	2.72869	8.0102	5e-05	0.00072992	thaumatin family domain containing protein, expressed
LOC_Os04g14690	Chr4:8243686-8249942	1.80046	11.8737	2.72134	4.77687	5e-05	0.00072992	flavin-containing monooxygenase family protein, putative, expressed
LOC_Os03g03720	Chr3:1662171-1665576	11.8183	77.2782	2.70904	6.1398	5e-05	0.00072992	glyceraldehyde-3-phosphate dehydrogenase, putative, expressed
LOC_Os02g37480	Chr2:22622378-22623188	12.2042	79.1827	2.69781	6.0773	5e-05	0.00072992	glycine-rich cell wall structural protein precursor, putative, expressed
LOC_Os10g11140	Chr10:6167110-6174631	4.86595	31.5428	2.69652	6.48486	5e-05	0.00072992	phosphoglucomutase, putative, expressed
LOC_Os08g14400	Chr8:8639189-8640760	0.212049	1.37214	2.69396	1.84981	0.0047	0.0307268	homeobox domain containing protein, expressed
LOC_Os12g19381	Chr12:11262562-11278448	38.6497	249.852	2.69254	5.90722	5e-05	0.00072992	ribulose bisphosphate carboxylase small chain, chloroplast precursor, putative, expressed
LOC_Os09g12660	Chr9:7245358-7249816	11.2144	72.4561	2.69175	7.27725	5e-05	0.00072992	glucose-1-phosphate adenylyltransferase large subunit, chloroplast precursor, putative, expressed
LOC_Os08g04540	Chr8:2256006-2257920	6.12655	39.5431	2.69028	6.84232	5e-05	0.00072992	decarboxylase, putative, expressed
LOC_Os02g02000	Chr2:554512-556320	0.159677	1.02974	2.68905	2.00519	0.00605	0.0370786	cytochrome P450, putative, expressed
LOC_Os08g38990	Chr8:24645859-24649860	0.983627	6.32408	2.68467	4.28586	5e-05	0.00072992	WRKY30, expressed
LOC_Os08g34500	Chr8:21643598-21649534	0.312892	2.01052	2.68383	2.36184	0.006	0.0368861	expressed protein
LOC_Os10g39150	Chr10:20893497-20895220	2.521	15.9984	2.66586	3.65475	5e-05	0.00072992	expressed protein
LOC_Os07g41630	Chr7:24954117-24954708	1.15171	7.29783	2.66369	2.09525	0.00055	0.00566905	expressed protein
LOC_Os11g40600	Chr11:24226245-24227813	1.08584	6.86506	2.66046	3.18276	0.0007	0.00697948	expressed protein
LOC_Os08g01490	Chr8:301641-304056	0.949448	5.98268	2.65563	4.11978	5e-05	0.00072992	cytochrome P450, putative, expressed
LOC_Os11g44800	Chr11:27111942-27113472	2.58195	16.2617	2.65494	4.66933	5e-05	0.00072992	expressed protein
LOC_Os03g05900	Chr3:2958311-2960616	0.60564	3.81282	2.65433	3.08184	5e-05	0.00072992	expressed protein
LOC_Os10g32170	Chr10:16896683-16898801	1.28761	8.03158	2.64099	4.39634	5e-05	0.00072992	xyloglucan galactosyltransferase KATAMARI1, putative, expressed
LOC_Os02g39740	Chr2:24000930-24003192	2.09789	13.0527	2.63734	4.67749	5e-05	0.00072992	psaB translation factor, putative, expressed
LOC_Os06g31300	Chr6:18217576-18218772	0.563608	3.49985	2.63453	2.89662	0.00145	0.0124502	PPR repeat domain containing protein, putative, expressed
LOC_Os02g52650	Chr2:32199521-32201722	0.37996	2.35705	2.63306	2.37522	0.00095	0.00888084	chlorophyll A-B binding protein, putative, expressed
LOC_Os01g05650	Chr1:2693133-2695085	245.092	1519.29	2.632	6.59317	5e-05	0.00072992	metallothionein, putative, expressed
LOC_Os03g60580	Chr3:34430583-34431200	37.8222	233.606	2.62677	5.74358	5e-05	0.00072992	actin-depolymerizing factor, putative, expressed
LOC_Os02g34810	Chr2:20868259-20872079	2.80325	17.2127	2.6183	5.29833	5e-05	0.00072992	OsAPx8 - Thylakoid-bound Ascorbate Peroxidase encoding gene 5,8, expressed
LOC_Os07g37030	Chr7:22184375-22187030	13.3872	81.3796	2.60382	5.82238	5e-05	0.00072992	cytochrome b6-f complex iron-sulfur subunit, chloroplast precursor, putative, expressed
LOC_Os05g41030	Chr5:24045496-24047844	1.55904	9.44902	2.59951	3.68279	5e-05	0.00072992	LTPL67 - Protease inhibitor/seed storage/LTP family protein precursor, expressed
LOC_Os03g01820	Chr3:499916-501855	0.635234	3.83551	2.59406	2.58101	0.0003	0.00344573	fatty acid hydroxylase, putative, expressed
LOC_Os11g07911	Chr11:4084030-4084731	4.50325	26.752	2.57061	3.94673	5e-05	0.00072992	expressed protein
LOC_Os03g42600	Chr3:23715171-23715759	17.3953	103.157	2.56807	5.38222	5e-05	0.00072992	expressed protein
LOC_Os08g33820	Chr8:21171213-21172680	32.1049	190.207	2.56671	5.95385	5e-05	0.00072992	chlorophyll A-B binding protein, putative, expressed
LOC_Os01g50910	Chr1:29233027-29234256	34.4974	203.724	2.56205	7.08645	5e-05	0.00072992	late embryogenesis abundant protein, group 3, putative, expressed
LOC_Os01g37750	Chr1:21114736-21115791	1.97636	11.6551	2.56004	3.7463	5e-05	0.00072992	glutathione S-transferase, putative, expressed
LOC_Os08g37456	Chr8:23723611-23727247	0.585063	3.42958	2.55137	2.95856	0.00025	0.00295117	flavonol synthase/flavanone 3-hydroxylase, putative, expressed
LOC_Os08g01510	Chr8:308327-310185	0.423419	2.4759	2.54779	2.39601	0.00125	0.0110436	cytochrome P450, putative, expressed
LOC_Os04g16680	Chr4:9075138-9077888	4.72655	27.5613	2.54378	4.83143	5e-05	0.00072992	fructose-1,6-bisphosphatase, putative, expressed
LOC_Os04g33460	Chr4:20239789-20243460	10.3179	60.0919	2.54203	6.27003	5e-05	0.00072992	1,4-alpha-glucan-branching enzyme 2, chloroplast precursor, putative, expressed
LOC_Os06g01950	Chr6:530533-532108	1.35899	7.9007	2.53945	4.26141	5e-05	0.00072992	phosphoglycerate mutase, putative, expressed
LOC_Os07g03000	Chr7:1117785-1120936	0.278044	1.61313	2.53648	3.13031	5e-05	0.00072992	receptor-like protein kinase precursor, putative, expressed
LOC_Os03g14050	Chr3:7626454-7629682	111.635	646.442	2.53373	7.4764	5e-05	0.00072992	thaumatin-like protein 1 precursor, putative, expressed
LOC_Os07g05940	Chr7:2870685-2872832	1.29113	7.46339	2.5312	4.79613	5e-05	0.00072992	9-cis-epoxycarotenoid dioxygenase 1, chloroplast precursor, putative, expressed
LOC_Os05g45100	Chr5:26198394-26200034	2.42574	13.9626	2.52507	4.86806	5e-05	0.00072992	anthocyanidin 5,3-O-glucosyltransferase, putative, expressed
LOC_Os11g25060	Chr11:14285136-14290853	0.71264	4.07456	2.5154	2.70809	0.00015	0.00189973	flavonol synthase/flavanone 3-hydroxylase, putative, expressed
LOC_Os04g27810	Chr4:16432045-16432507	3.26525	18.6262	2.51207	2.40176	0.0016	0.013514	retrotransposon protein, putative, Ty3-gypsy subclass, expressed
LOC_Os02g43370	Chr2:26170386-26174970	0.212003	1.20653	2.50871	2.35712	0.0015	0.0128149	transposon protein, putative, unclassified, expressed
LOC_Os04g46970	Chr4:27843254-27848331	2.22819	12.6386	2.50389	5.73392	5e-05	0.00072992	glucosyltransferase, putative, expressed
LOC_Os01g24010	Chr1:13517517-13531777	0.97906	5.55319	2.50385	3.95214	0.00015	0.00189973	pleiotropic drug resistance protein, putative, expressed
LOC_Os03g50080	Chr3:28565471-28566831	2.57141	14.5731	2.50268	3.74678	5e-05	0.00072992	peptidyl-prolyl cis-trans isomerase, FKBP-type, putative, expressed
LOC_Os02g42570	Chr2:25589925-25590804	2.31001	13.0361	2.49654	3.27387	5e-05	0.00072992	ferredoxin-thioredoxin reductase, variable chain, putative, expressed
LOC_Os01g17240	Chr1:9913389-9917318	1.59933	9.01333	2.49459	4.51483	5e-05	0.00072992	transporter, major facilitator family, putative, expressed
LOC_Os07g39740	Chr7:23814134-23816459	0.702963	3.95299	2.49142	2.98382	5e-05	0.00072992	GDSL-like lipase/acylhydrolase, putative, expressed
LOC_Os01g59100	Chr1:34141402-34145203	4.11094	23.0208	2.48539	6.02132	5e-05	0.00072992	cytokinin-N-glucosyltransferase 1, putative, expressed
LOC_Os04g56430	Chr4:33641291-33642362	244.035	1361.3	2.47983	6.89881	5e-05	0.00072992	cysteine-rich receptor-like protein kinase, putative, expressed
LOC_Os03g11910	Chr3:6243989-6247317	2.26231	12.5415	2.47085	5.11267	5e-05	0.00072992	DnaK family protein, putative, expressed
LOC_Os03g59430	Chr3:33829499-33834198	5.37051	29.6534	2.46507	6.76929	5e-05	0.00072992	uncharacterized glycosyltransferase, putative, expressed
LOC_Os01g06890	Chr1:3259437-3262454	0.298934	1.63616	2.45241	2.6341	0.00015	0.00189973	leucine-rich repeat family protein, putative, expressed
LOC_Os01g71330	Chr1:41343326-41344284	0.567832	3.0996	2.44855	2.07513	0.0021	0.0166061	expressed protein
LOC_Os05g37520	Chr5:21963773-21966012	8.42904	45.8888	2.4447	7.3585	5e-05	0.00072992	expressed protein
LOC_Os10g33190	Chr10:17389720-17393970	3.851	20.9623	2.44449	4.13834	5e-05	0.00072992	expressed protein
LOC_Os03g21560	Chr3:12320855-12321798	5.77448	31.3859	2.44235	4.41169	5e-05	0.00072992	photosystem II 11 kD protein, putative, expressed
LOC_Os10g09240	Chr10:4994497-4995160	8.95975	48.3203	2.4311	4.06914	5e-05	0.00072992	expressed protein
LOC_Os02g02210	Chr2:679444-697350	11.013	59.3826	2.43083	6.4864	5e-05	0.00072992	aminotransferase, putative, expressed
LOC_Os03g37320	Chr3:20677903-20688391	0.277934	1.49759	2.42983	2.17041	0.0015	0.0128149	expressed protein
LOC_Os09g17740	Chr9:10845677-10847156	50.0236	269.404	2.42909	4.7881	5e-05	0.00072992	chlorophyll A-B binding protein, putative, expressed
LOC_Os10g40040	Chr10:21444256-21445487	9.76969	51.9263	2.41008	5.66592	5e-05	0.00072992	expressed protein
LOC_Os01g59080	Chr1:34138325-34139709	4.59273	24.3155	2.40445	4.42529	5e-05	0.00072992	expressed protein
LOC_Os02g10390	Chr2:5468366-5470496	14.7709	77.585	2.39302	5.11101	5e-05	0.00072992	chlorophyll A-B binding protein, putative, expressed
LOC_Os02g15750	Chr2:8873031-8876441	3.27993	17.2248	2.39275	4.74852	5e-05	0.00072992	expressed protein
LOC_Os04g02850	Chr4:1110872-1113296	0.278403	1.45967	2.39039	2.79682	0.00245	0.018727	pentatricopeptide, putative, expressed
LOC_Os07g04840	Chr7:2137118-2138229	17.4175	91.2873	2.38987	5.1182	5e-05	0.00072992	PsbP, putative, expressed
LOC_Os02g32860	Chr2:19509811-19514935	0.736778	3.85646	2.38797	3.95944	5e-05	0.00072992	poly synthetase 3, putative, expressed
LOC_Os02g51450	Chr2:31520982-31523070	0.494496	2.57057	2.37806	2.60029	0.0007	0.00697948	mTERF family protein, expressed
LOC_Os09g36040	Chr9:20751728-20754649	2.29548	11.9314	2.3779	4.06447	5e-05	0.00072992	rhodanese-like domain containing protein, putative, expressed
LOC_Os01g31690	Chr1:17349310-17350816	42.8322	222.556	2.3774	5.48809	5e-05	0.00072992	oxygen-evolving enhancer protein 1, chloroplast precursor, putative, expressed
LOC_Os05g05930	Chr5:2969524-2970353	2.35528	12.1705	2.36942	3.2659	0.00165	0.013809	peripheral-type benzodiazepine receptor, putative, expressed
LOC_Os07g38960	Chr7:23357682-23359694	17.3316	89.5035	2.36854	5.27072	5e-05	0.00072992	chlorophyll A-B binding protein, putative, expressed
LOC_Os06g32240	Chr6:18773301-18774641	4.29405	22.1586	2.36746	3.90159	5e-05	0.00072992	THION9 - Plant thionin family protein precursor, expressed
LOC_Os01g48500	Chr1:27801412-27802497	1.2109	6.23637	2.36463	3.19435	0.0002	0.00243581	expressed protein
LOC_Os01g71070	Chr1:41133499-41134983	0.500125	2.57492	2.36417	2.15124	0.00195	0.0157495	xylanase inhibitor, putative, expressed
LOC_Os02g07360	Chr2:3798021-3800737	0.251672	1.29393	2.36214	2.11939	0.0021	0.0166061	pentatricopeptide containing protein, putative, expressed
LOC_Os05g42250	Chr5:24711967-24716742	1.96124	10.0688	2.36006	4.77629	5e-05	0.00072992	cyclic nucleotide-gated ion channel 2, putative, expressed
LOC_Os02g52260	Chr2:31999204-32001255	4.25036	21.7383	2.35458	4.27601	5e-05	0.00072992	expressed protein
LOC_Os01g62610	Chr1:36253546-36256977	1.28912	6.55044	2.3452	3.6033	5e-05	0.00072992	peptidyl-prolyl cis-trans isomerase, FKBP-type, putative, expressed
LOC_Os07g43604	Chr7:26102430-26104691	2.11936	10.7669	2.3449	4.17922	5e-05	0.00072992	expressed protein
LOC_Os05g33280	Chr5:19507482-19509091	1.99751	10.1266	2.34188	3.42657	5e-05	0.00072992	thylakoid lumen protein, putative, expressed
LOC_Os03g51920	Chr3:29784612-29787015	1.01089	5.12066	2.3407	3.6709	5e-05	0.00072992	peptidase, M50 family, putative, expressed
LOC_Os01g16980	Chr1:9711614-9712419	0.556125	2.80474	2.33438	1.58812	0.00725	0.0423717	expressed protein
LOC_Os06g21590	Chr6:12452654-12454197	34.6828	174.765	2.33312	5.20422	5e-05	0.00072992	chlorophyll A-B binding protein, putative, expressed
LOC_Os04g52260	Chr4:31061681-31062703	1.26176	6.31868	2.32419	2.64697	0.00045	0.00480686	LTPL124 - Protease inhibitor/seed storage/LTP family protein precursor, expressed
LOC_Os10g42610	Chr10:22964025-22965622	13.9644	69.6954	2.3193	6.49674	5e-05	0.00072992	expressed protein
LOC_Os03g13140	Chr3:7092738-7094015	0.434601	2.16843	2.31889	1.85368	0.00265	0.0199294	non-symbiotic hemoglobin 2, putative, expressed
LOC_Os03g57220	Chr3:32628527-32632535	5.8599	29.2183	2.31793	4.92395	5e-05	0.00072992	hydroxyacid oxidase 1, putative, expressed
LOC_Os10g41480	Chr10:22289944-22293566	0.523177	2.58286	2.3036	2.51468	0.00095	0.00888084	phospho-2-dehydro-3-deoxyheptonate aldolase, chloroplast precursor, putative, expressed
LOC_Os02g17900	Chr2:10363978-10365536	1.32458	6.52932	2.3014	2.72676	0.0008	0.00773994	glycosyl hydrolases family 16, putative, expressed
LOC_Os01g62900	Chr1:36430977-36442944	3.92197	19.3091	2.29963	5.64923	5e-05	0.00072992	amino acid kinase, putative, expressed
LOC_Os05g48650	Chr5:27883502-27884410	46.2341	227.567	2.29926	7.2727	5e-05	0.00072992	transcription factor HBP-1b, putative, expressed
LOC_Os01g49710	Chr1:28566624-28567663	3.93285	19.291	2.29428	4.18344	5e-05	0.00072992	glutathione S-transferase, putative, expressed
LOC_Os03g57490	Chr3:32778386-32782857	0.217784	1.0666	2.29204	2.28374	0.0029	0.0212917	fasciclin domain containing protein, expressed
LOC_Os03g40770	Chr3:22666721-22669037	1.46947	7.19068	2.29084	2.9401	0.0003	0.00344573	expressed protein
LOC_Os02g01340	Chr2:183600-185327	2.33963	11.4156	2.28666	3.62418	5e-05	0.00072992	ferredoxin--NADP reductase, chloroplast precursor, putative, expressed
LOC_Os03g43750	Chr3:24466602-24473610	1.67632	8.15906	2.28311	4.58358	5e-05	0.00072992	retrotransposon, putative, centromere-specific, expressed
LOC_Os07g29410	Chr7:17268664-17270113	2.55134	12.3227	2.27199	4.17457	5e-05	0.00072992	thioredoxin, putative, expressed
LOC_Os07g07540	Chr7:3759922-3762065	1.95235	9.42235	2.27087	3.70271	5e-05	0.00072992	SHOOT1 protein, putative, expressed
LOC_Os01g64660	Chr1:37519522-37524040	2.65797	12.7722	2.26461	2.28314	0.00125	0.0110436	fructose-1,6-bisphosphatase, putative, expressed
LOC_Os01g72950	Chr1:42312148-42313577	1.03003	4.94797	2.26416	2.39567	0.00095	0.00888084	expressed protein
LOC_Os04g20749	Chr4:11638374-11642936	1.74928	8.39874	2.26341	3.13582	5e-05	0.00072992	expressed protein
LOC_Os10g35050	Chr10:18701131-18702561	1.36857	6.56442	2.262	3.08676	0.0001	0.00135054	aquaporin protein, putative, expressed
LOC_Os06g31090	Chr6:18079006-18079819	1.05241	5.04597	2.26144	2.76146	0.00315	0.0227968	GAMYB-binding protein, putative, expressed
LOC_Os03g24590	Chr3:14006154-14007356	1.99872	9.57953	2.26088	3.43115	0.0001	0.00135054	mTERF domain containing protein, expressed
LOC_Os10g39700	Chr10:21219484-21222247	0.691708	3.307	2.25729	2.35204	0.0008	0.00773994	CHIT15 - Chitinase family protein precursor, putative, expressed
LOC_Os01g45550	Chr1:25863701-25868361	0.830652	3.96947	2.25663	3.32483	5e-05	0.00072992	auxin efflux carrier component, putative, expressed
LOC_Os02g13260	Chr2:7062836-7064444	0.433468	2.07142	2.25662	2.10238	0.00285	0.0210349	F-box family protein, putative, expressed
LOC_Os09g35010	Chr9:20395223-20396205	0.856998	4.09035	2.25486	2.6762	0.00285	0.0210349	dehydration-responsive element-binding protein, putative, expressed
LOC_Os07g09814	Chr7:5219437-5226721	6.46313	30.6683	2.24644	5.18545	5e-05	0.00072992	OsFBX221 - F-box domain containing protein, expressed
LOC_Os03g16030	Chr3:8834822-8835802	1.75243	8.31376	2.24614	3.11925	5e-05	0.00072992	hsp20/alpha crystallin family protein, putative, expressed
LOC_Os01g06310	Chr1:2999575-3001204	113.825	539.006	2.24348	6.35621	5e-05	0.00072992	glycine-rich cell wall structural protein precursor, putative, expressed
LOC_Os02g57020	Chr2:34925370-34926272	1.23604	5.84824	2.24228	2.45414	0.00085	0.00814427	YCF37, putative, expressed
LOC_Os07g36080	Chr7:21574434-21579332	20.6556	97.6812	2.24154	3.58558	5e-05	0.00072992	oxygen evolving enhancer protein 3 domain containing protein, expressed
LOC_Os05g38290	Chr5:22450675-22452631	6.34542	29.8993	2.23632	6.06096	5e-05	0.00072992	protein phosphatase 2C, putative, expressed
LOC_Os05g23924	Chr5:13755513-13763435	1.07894	5.07752	2.23451	3.17569	5e-05	0.00072992	glycosyl hydrolase family 10 protein, putative, expressed
LOC_Os12g19470	Chr12:11320266-11322547	8.52343	39.9076	2.22716	5.14793	5e-05	0.00072992	ribulose bisphosphate carboxylase small chain, chloroplast precursor, putative, expressed
LOC_Os03g48040	Chr3:27309856-27312904	1.4633	6.84963	2.2268	2.52737	0.0001	0.00135054	2Fe-2S iron-sulfur cluster binding domain containing protein, expressed
LOC_Os03g56670	Chr3:32265687-32274174	13.581	63.4681	2.22445	3.26118	0.0001	0.00135054	photosystem I reaction center subunit III, chloroplast precursor, putative, expressed
LOC_Os07g29240	Chr7:17136132-17144614	0.671919	3.1363	2.2227	1.79652	0.0037	0.0257669	expressed protein
LOC_Os03g41130	Chr3:22863493-22864072	4.76969	22.1745	2.21693	3.26938	5e-05	0.00072992	expressed protein
LOC_Os02g51760	Chr2:31704167-31707395	0.869449	4.04204	2.21691	3.24181	5e-05	0.00072992	expressed protein
LOC_Os01g38110	Chr1:21342128-21344066	1.06619	4.94861	2.21456	3.10332	5e-05	0.00072992	cytochrome P450, putative, expressed
LOC_Os03g23940	Chr3:13585244-13586204	0.866089	4.00547	2.20938	2.48638	0.005	0.0321583	expressed protein
LOC_Os04g38600	Chr4:22937055-22939073	9.07234	41.8645	2.20618	4.28152	5e-05	0.00072992	glyceraldehyde-3-phosphate dehydrogenase, putative, expressed
LOC_Os03g48010	Chr3:27297347-27300664	0.290786	1.34001	2.20422	2.57479	0.00025	0.00295117	exostosin, putative, expressed
LOC_Os07g40220	Chr7:24115633-24116649	1.33686	6.13412	2.19801	1.74821	0.0029	0.0212917	expressed protein
LOC_Os06g15330	Chr6:8704830-8706949	0.213549	0.978318	2.19574	1.99583	0.0052	0.033158	CCT/B-box zinc finger protein, putative, expressed
LOC_Os01g41710	Chr1:23607347-23608583	76.5215	350.339	2.19482	3.98289	5e-05	0.00072992	chlorophyll A-B binding protein, putative, expressed
LOC_Os03g33090	Chr3:18935191-18936341	2.70875	12.3449	2.18822	3.57983	5e-05	0.00072992	DUF260 domain containing protein, putative, expressed
LOC_Os02g47200	Chr2:28812390-28814078	0.617798	2.80715	2.1839	2.30703	0.00135	0.0117355	transposon protein, putative, unclassified, expressed
LOC_Os01g71670	Chr1:41533272-41535619	3.37489	15.333	2.18372	3.95044	5e-05	0.00072992	glycosyl hydrolases family 17, putative, expressed
LOC_Os05g15690	Chr5:8870359-8871945	8.00771	36.3612	2.18294	4.76667	5e-05	0.00072992	expansin precursor, putative, expressed
LOC_Os02g49680	Chr2:30361875-30363745	5.17117	23.4701	2.18226	4.43801	5e-05	0.00072992	arsenate reductase, putative, expressed
LOC_Os07g45180	Chr7:26972053-26976381	0.120249	0.542858	2.17455	1.8697	0.00465	0.0304668	transposon protein, putative, unclassified, expressed
LOC_Os01g50080	Chr1:28774280-28780365	2.21785	9.96042	2.16705	5.353	5e-05	0.00072992	MDR-like ABC transporter, putative, expressed
LOC_Os01g04330	Chr1:1930993-1931904	4.3015	19.3007	2.16574	3.79361	5e-05	0.00072992	OsCML16 - Calmodulin-related calcium sensor protein, expressed
LOC_Os10g35070	Chr10:18707758-18711564	30.0808	134.948	2.16549	6.11563	5e-05	0.00072992	alpha-galactosidase precursor, putative, expressed
LOC_Os02g25680	Chr2:15029458-15034532	1.15905	5.18525	2.16147	2.70969	0.00125	0.0110436	expressed protein
LOC_Os05g45090	Chr5:26196243-26198100	4.05672	18.1384	2.16066	4.98906	5e-05	0.00072992	anthocyanidin 5,3-O-glucosyltransferase, putative, expressed
LOC_Os07g36110	Chr7:21582856-21583997	1.6785	7.50341	2.16037	2.90785	0.0007	0.00697948	expressed protein
LOC_Os08g10020	Chr8:5806457-5808458	31.6542	141.316	2.15846	5.09639	5e-05	0.00072992	photosystem II 10 kDa polypeptide, chloroplast precursor, putative, expressed
LOC_Os04g32960	Chr4:19920788-19929902	0.140695	0.627535	2.15713	2.21708	0.00095	0.00888084	TUDOR protein with multiple SNc domains, putative, expressed
LOC_Os04g03210	Chr4:1358662-1362223	0.200371	0.893441	2.1567	2.0838	0.0031	0.0224896	receptor kinase, putative, expressed
LOC_Os11g07020	Chr11:3488552-3491659	46.2505	205.93	2.15462	5.28488	5e-05	0.00072992	fructose-bisphospate aldolase isozyme, putative, expressed
LOC_Os10g19919	Chr10:9984426-9987828	2.0156	8.97156	2.15415	3.25539	5e-05	0.00072992	retrotransposon protein, putative, Ty3-gypsy subclass, expressed
LOC_Os11g05640	Chr11:2560815-2563634	1.27318	5.66411	2.15341	3.67533	5e-05	0.00072992	bZIP transcription factor domain containing protein, expressed
LOC_Os06g44610	Chr6:26937146-26941028	1.44097	6.3991	2.15083	2.57804	0.0002	0.00243581	membrane associated DUF588 domain containing protein, putative, expressed
LOC_Os08g39430	Chr8:24935695-24936427	0.814949	3.59531	2.14133	1.79465	0.00445	0.0295056	thylakoid lumenal 19 kDa protein, chloroplast precursor, putative, expressed
LOC_Os01g15270	Chr1:8545996-8546894	3623.19	15949.3	2.13816	2.58007	0.0021	0.0166061	expressed protein
LOC_Os01g69190	Chr1:40211196-40213481	1.08056	4.7437	2.13423	2.77512	0.00045	0.00480686	regulatory protein, putative, expressed
LOC_Os09g26810	Chr9:16287915-16290862	1.22353	5.36589	2.13277	2.33637	0.0002	0.00243581	chlorophyll A-B binding protein, putative, expressed
LOC_Os01g12520	Chr1:6879904-6881968	3.22984	14.118	2.128	3.77034	5e-05	0.00072992	mitochondrial carrier protein, putative, expressed
LOC_Os03g15870	Chr3:8753550-8756023	3.47056	15.1389	2.12502	3.96959	5e-05	0.00072992	ribosomal protein L4, putative, expressed
LOC_Os02g58160	Chr2:35578531-35582824	2.01718	8.78568	2.12281	3.75547	5e-05	0.00072992	expressed protein
LOC_Os09g35030	Chr9:20403148-20404332	3.11041	13.5355	2.12157	3.85773	0.0001	0.00135054	dehydration-responsive element-binding protein, putative, expressed
LOC_Os05g08750	Chr5:4799110-4800891	4.73478	20.5657	2.11887	5.27398	5e-05	0.00072992	UDP-glucoronosyl and UDP-glucosyl transferase domain containing protein, expressed
LOC_Os07g09710	Chr7:5164870-5167066	0.564236	2.44003	2.11253	2.44595	0.00015	0.00189973	OsFBX220 - F-box domain containing protein, expressed
LOC_Os03g52460	Chr3:30099368-30104596	1.05058	4.52499	2.10672	3.27654	5e-05	0.00072992	glucose-1-phosphate adenylyltransferase large subunit, putative, expressed
LOC_Os01g45659	Chr1:25931148-25931730	8.05922	34.68	2.10539	2.89577	5e-05	0.00072992	expressed protein
LOC_Os03g20700	Chr3:11712168-11720131	5.42066	23.2463	2.10046	5.3005	5e-05	0.00072992	magnesium-chelatase, putative, expressed
LOC_Os05g41190	Chr5:24127104-24128452	2.03534	8.70317	2.09627	3.18548	5e-05	0.00072992	expressed protein
LOC_Os06g09610	Chr6:4888547-4890731	6.3337	27.0458	2.09428	3.96363	5e-05	0.00072992	peroxiredoxin, putative, expressed
LOC_Os01g01340	Chr1:168469-170389	10.972	46.831	2.09364	5.43629	5e-05	0.00072992	light-induced protein 1-like, putative, expressed
LOC_Os05g33520	Chr5:19691342-19694288	2.4565	10.462	2.09048	3.44309	5e-05	0.00072992	expressed protein
LOC_Os06g11200	Chr6:5878571-5880549	0.637004	2.70182	2.08456	2.42569	0.00465	0.0304668	12-oxophytodienoate reductase, putative, expressed
LOC_Os02g51020	Chr2:31202196-31203782	1.09367	4.62587	2.08055	2.351	0.00135	0.0117355	expressed protein
LOC_Os07g25430	Chr7:14533303-14534386	19.5305	82.5256	2.07911	4.61315	5e-05	0.00072992	photosystem I reaction center subunit IV A, chloroplast precursor, putative, expressed
LOC_Os08g04180	Chr8:2029731-2033180	67.6896	285.775	2.07787	5.7443	5e-05	0.00072992	tryptophan synthase beta chain 1, putative, expressed
LOC_Os03g03810	Chr3:1714571-1715230	10.5994	44.6381	2.0743	3.57896	5e-05	0.00072992	DEF8 - Defensin and Defensin-like DEFL family, expressed
LOC_Os01g51870	Chr1:29820728-29822139	17.8337	75.0061	2.0724	5.92474	5e-05	0.00072992	methyltransferase, putative, expressed
LOC_Os06g20310	Chr6:11669577-11673430	0.942389	3.95941	2.07089	3.0013	5e-05	0.00072992	expressed protein
LOC_Os06g43000	Chr6:25832640-25836854	1.91846	8.04548	2.06823	3.72688	5e-05	0.00072992	nitrate-induced NOI protein, expressed
LOC_Os11g19864	Chr11:11436950-11446266	2.76176	11.5496	2.06419	4.70765	5e-05	0.00072992	transposon protein, putative, Pong sub-class, expressed
LOC_Os12g38100	Chr12:23399037-23399863	1.69525	7.08749	2.06377	2.30158	0.0015	0.0128149	membrane associated DUF588 domain containing protein, putative, expressed
LOC_Os08g06530	Chr8:3694281-3696648	1.91408	7.99973	2.0633	2.72127	5e-05	0.00072992	rubredoxin family protein, putative, expressed
LOC_Os04g56320	Chr4:33575151-33579655	0.752499	3.14489	2.06325	2.82656	5e-05	0.00072992	AAA-type ATPase family protein, putative, expressed
LOC_Os01g21990	Chr1:12344459-12351233	0.464667	1.9408	2.06239	2.40642	0.0002	0.00243581	CRS2-associated factor 2, chloroplast precursor, putative, expressed
LOC_Os02g37060	Chr2:22390364-22391131	3.67335	15.3003	2.05839	2.8194	5e-05	0.00072992	photosystem II 5 kDa protein, chloroplast precursor, putative, expressed
LOC_Os07g44430	Chr7:26548651-26549804	2.60498	10.8448	2.05765	2.66548	0.0001	0.00135054	peroxiredoxin, putative, expressed
LOC_Os06g49120	Chr6:29762518-29766745	1.02222	4.2396	2.05222	3.16702	5e-05	0.00072992	Complex I intermediate-associated protein 30 domain containing protein, putative, expressed
LOC_Os02g51570	Chr2:31591220-31593152	1.18361	4.90657	2.05152	2.58819	5e-05	0.00072992	peptidyl-prolyl cis-trans isomerase, FKBP-type, putative, expressed
LOC_Os10g21590	Chr10:11053035-11057745	10.526	43.4998	2.04705	6.22876	5e-05	0.00072992	transporter family protein, putative, expressed
LOC_Os10g10170	Chr10:5577465-5585549	2.03353	8.39419	2.0454	4.46598	5e-05	0.00072992	PPR repeat domain containing protein, putative, expressed
LOC_Os06g05950	Chr6:2724122-2726538	0.524141	2.15678	2.04085	2.01599	0.00095	0.00888084	expressed protein
LOC_Os01g70310	Chr1:40714144-40717179	0.602332	2.46852	2.03502	2.44604	0.00195	0.0157495	inducer of CBF expression 2, putative, expressed
LOC_Os09g24530	Chr9:14607513-14609923	1.11279	4.55557	2.03345	2.98316	5e-05	0.00072992	ribulose-1,5 bisphosphate carboxylase/oxygenase large subunit N-methyltransferase, chloroplast precursor, putative, expressed
LOC_Os11g24500	Chr11:13969952-13971084	1.0825	4.4237	2.03088	1.79127	0.00825	0.0465811	expressed protein
LOC_Os09g19970	Chr9:11955929-11957194	12.424	50.7155	2.02929	5.69164	5e-05	0.00072992	expressed protein
LOC_Os07g28610	Chr7:16743566-16745510	3.34701	13.6419	2.0271	3.04919	5e-05	0.00072992	expressed protein
LOC_Os12g36870	Chr12:22597814-22599178	0.502606	2.04734	2.02625	1.85204	0.00645	0.0389289	uncharacterized glycosyltransferase, putative, expressed
LOC_Os06g35160	Chr6:20490194-20492274	9.32664	37.974	2.02558	5.6068	5e-05	0.00072992	CAMK_KIN1/SNF1/Nim1_like.26 - CAMK includes calcium/calmodulin depedent protein kinases, expressed
LOC_Os04g43200	Chr4:25563392-25565204	10.9388	44.4719	2.02345	4.81092	5e-05	0.00072992	caleosin related protein, putative, expressed
LOC_Os02g04340	Chr2:1913424-1916183	0.824576	3.3433	2.01955	3.12636	5e-05	0.00072992	NIN-like protein 2, putative, expressed
LOC_Os03g50490	Chr3:28822404-28826521	6.25958	25.3134	2.01577	4.53193	5e-05	0.00072992	glutamine synthetase, catalytic domain containing protein, expressed
LOC_Os12g43140	Chr12:26793279-26793954	0.988655	3.98419	2.01075	2.03394	0.00685	0.0406324	late embryogenesis abundant protein D-34, putative, expressed
LOC_Os06g10910	Chr6:5701638-5704991	1.24227	5.00556	2.01055	3.5133	5e-05	0.00072992	xyloglucan fucosyltransferase, putative, expressed
LOC_Os01g53820	Chr1:30940084-30940402	12.0018	48.2865	2.00837	2.0442	0.0013	0.0113923	expressed protein
LOC_Os03g06360	Chr3:3184491-3185937	0.485902	1.95324	2.00713	2.0722	0.00625	0.0379914	late embryogenesis abundant protein D-34, putative, expressed
LOC_Os11g04710	Chr11:2006967-2010121	0.560545	2.25285	2.00685	2.42145	0.00065	0.00656619	cytochrome P450, putative, expressed
LOC_Os04g47020	Chr4:27868077-27870370	0.809498	3.25111	2.00583	2.52659	0.00035	0.00391428	genetic modifier, putative, expressed
LOC_Os08g31860	Chr8:19747415-19748835	3.05492	12.2292	2.00112	3.96907	5e-05	0.00072992	expressed protein
LOC_Os10g31330	Chr10:16428824-16430091	23.1709	92.6823	1.99998	5.34502	5e-05	0.00072992	retrotransposon protein, putative, unclassified, expressed
LOC_Os12g43440	Chr12:26956141-26956894	6.26647	25.0447	1.99878	3.39027	5e-05	0.00072992	thaumatin, putative, expressed
LOC_Os06g40440	Chr6:24089902-24091217	33.8266	134.584	1.99228	6.80448	5e-05	0.00072992	expressed protein
LOC_Os01g62770	Chr1:36346112-36349549	0.343338	1.36523	1.99144	2.53163	0.0003	0.00344573	expressed protein
LOC_Os01g16170	Chr1:9133518-9140430	5.53212	21.9927	1.99112	4.85232	5e-05	0.00072992	PQ loop repeat domain containing protein, expressed
LOC_Os06g50130	Chr6:30362749-30363810	0.809677	3.20414	1.98452	1.88374	0.0024	0.0184335	expressed protein
LOC_Os02g01150	Chr2:78169-82952	1.4717	5.82156	1.98392	3.46717	5e-05	0.00072992	erythronate-4-phosphate dehydrogenase domain containing protein, expressed
LOC_Os05g49300	Chr5:28289828-28293272	9.45469	37.3247	1.98103	4.50593	5e-05	0.00072992	iron-sulfur cluster assembly enzyme ISCU, mitochondrial precursor, putative, expressed
LOC_Os11g05394	Chr11:2418476-2423365	2.50371	9.87966	1.98039	4.45236	5e-05	0.00072992	nucampholin, putative, expressed
LOC_Os02g51080	Chr2:31246224-31248818	19.7663	77.427	1.96979	5.27663	5e-05	0.00072992	FAD binding domain containing protein, expressed
LOC_Os01g57710	Chr1:33364238-33367379	8.21379	32.1243	1.96754	4.69208	5e-05	0.00072992	membrane protein, putative, expressed
LOC_Os05g08110	Chr5:4415781-4416721	1.40672	5.49949	1.96697	2.51817	0.00075	0.00738829	early light-induced protein, chloroplast precursor, putative, expressed
LOC_Os02g44990	Chr2:27248696-27251470	9.34295	36.5202	1.96675	5.42616	5e-05	0.00072992	OsFBDUF13 - F-box and DUF domain containing protein, expressed
LOC_Os01g40430	Chr1:22824808-22827116	2.85759	11.1661	1.96626	3.15057	5e-05	0.00072992	WRKY27, expressed
LOC_Os09g12290	Chr9:6995048-7009516	6.14137	23.9876	1.96566	5.44807	5e-05	0.00072992	bifunctional aspartokinase/homoserine dehydrogenase, chloroplast precursor, putative, expressed
LOC_Os07g08420	Chr7:4322230-4326708	0.763497	2.98199	1.96558	2.58987	0.00015	0.00189973	bZIP transcription factor domain containing protein, expressed
LOC_Os06g49160	Chr6:29789097-29790677	1.85231	7.23079	1.96483	2.6747	0.0001	0.00135054	thylakoid lumenal 16.5 kDa protein, chloroplast precursor, putative, expressed
LOC_Os01g56680	Chr1:32699023-32709294	21.5076	83.8162	1.96238	3.65683	5e-05	0.00072992	photosystem II reaction center W protein, chloroplast precursor, putative, expressed
LOC_Os07g11739	Chr7:6494464-6502011	16.8088	65.4963	1.96219	4.89175	5e-05	0.00072992	cytochrome P450, putative, expressed
LOC_Os03g37930	Chr3:21060412-21064968	2.11043	8.16379	1.9517	3.70683	5e-05	0.00072992	potassium transporter, putative, expressed
LOC_Os09g21900	Chr9:13259201-13260189	0.721882	2.79016	1.95051	1.7436	0.0083	0.0467747	expressed protein
LOC_Os03g50960	Chr3:29110321-29111122	17.4942	67.6158	1.95048	4.65724	5e-05	0.00072992	LTPL118 - Protease inhibitor/seed storage/LTP family protein precursor, expressed
LOC_Os08g01380	Chr8:241678-242634	24.6106	95.0865	1.94996	4.35612	5e-05	0.00072992	2Fe-2S iron-sulfur cluster binding domain containing protein, expressed
LOC_Os03g03470	Chr3:1499618-1504242	1.08362	4.18581	1.94965	2.80646	5e-05	0.00072992	expressed protein
LOC_Os01g22590	Chr1:12701743-12704572	0.662202	2.55779	1.94956	2.80201	0.0003	0.00344573	retrotransposon protein, putative, unclassified, expressed
LOC_Os07g39240	Chr7:23491412-23495070	0.721338	2.78469	1.94877	3.51655	5e-05	0.00072992	expressed protein
LOC_Os08g34360	Chr8:21564092-21568499	0.282756	1.0888	1.94511	1.6389	0.00635	0.0384325	AP2 domain containing protein, expressed
LOC_Os03g12820	Chr3:6895177-6898428	16.0873	61.8425	1.94267	5.64116	5e-05	0.00072992	ATP8, putative, expressed
LOC_Os07g47640	Chr7:28474472-28475227	11.9574	45.9638	1.94259	3.71594	5e-05	0.00072992	ultraviolet-B-repressible protein, putative, expressed
LOC_Os03g21660	Chr3:12362126-12365893	0.416063	1.59842	1.94177	2.45981	0.00025	0.00295117	transposon protein, putative, unclassified, expressed
LOC_Os07g05480	Chr7:2546426-2547414	18.3014	70.2207	1.93994	3.91416	5e-05	0.00072992	photosystem I reaction center subunit, chloroplast precursor, putative, expressed
LOC_Os09g10750	Chr9:5866441-5870676	0.693858	2.65451	1.93573	2.10577	0.0013	0.0113923	rhodanese-like, putative, expressed
LOC_Os04g05010	Chr4:2426735-2429504	22.6121	86.246	1.93136	4.92536	5e-05	0.00072992	CBS domain containing membrane protein, putative, expressed
LOC_Os01g39136	Chr1:22031207-22034011	0.37991	1.44802	1.93035	2.1924	0.00275	0.0204362	retrotransposon protein, putative, unclassified, expressed
LOC_Os10g34020	Chr10:18145791-18149595	6.63656	25.2636	1.92855	4.11486	5e-05	0.00072992	glutathione S-transferase, putative, expressed
LOC_Os08g07720	Chr8:4316159-4318638	0.622373	2.36738	1.92744	2.40471	0.0026	0.0196402	transferase family protein, putative, expressed
LOC_Os08g41090	Chr8:25971763-25974968	0.597729	2.27112	1.92584	2.1637	0.00345	0.0244478	peroxidase precursor, putative, expressed
LOC_Os03g58170	Chr3:33110647-33118318	9.19395	34.8911	1.9241	4.75374	5e-05	0.00072992	stem-specific protein TSJT1, putative, expressed
LOC_Os05g40180	Chr5:23598186-23605114	0.434596	1.64917	1.92399	2.51066	0.0001	0.00135054	serine/threonine-protein kinase stt7, chloroplast precursor, putative, expressed
LOC_Os03g16050	Chr3:8841267-8843069	2.94894	11.1901	1.92396	3.21976	5e-05	0.00072992	fructose-1,6-bisphosphatase, putative, expressed
LOC_Os04g53606	Chr4:31957652-31958630	1.73586	6.58246	1.92297	2.91997	0.00025	0.00295117	expressed protein
LOC_Os08g27010	Chr8:16506114-16510326	1.41266	5.35232	1.92175	2.55498	5e-05	0.00072992	APE1, putative, expressed
LOC_Os08g02630	Chr8:1089734-1091023	9.37211	35.3561	1.91551	3.78994	5e-05	0.00072992	photosystem II core complex proteins psbY, chloroplast precursor, putative, expressed
LOC_Os12g16720	Chr12:9579746-9582014	14.1697	53.4269	1.91476	5.8017	5e-05	0.00072992	cytochrome P450 71A1, putative, expressed
LOC_Os04g45810	Chr4:27124165-27125512	34.0314	128.281	1.91437	5.27447	5e-05	0.00072992	homeobox associated leucine zipper, putative, expressed
LOC_Os05g35970	Chr5:21313234-21314150	1.6967	6.39533	1.91429	2.34552	0.0012	0.0107172	expressed protein
LOC_Os08g03310	Chr8:1536568-1540377	0.732049	2.75561	1.91236	2.86179	5e-05	0.00072992	zinc finger family protein, putative, expressed
LOC_Os01g73110	Chr1:42411938-42413227	6.15219	23.1292	1.91054	4.32998	5e-05	0.00072992	expressed protein
LOC_Os12g29400	Chr12:17463628-17465265	9.81102	36.884	1.91052	4.34432	5e-05	0.00072992	GRAM domain containing protein, expressed
LOC_Os07g34570	Chr7:20724562-20726098	158.468	595.475	1.90985	5.45695	5e-05	0.00072992	FAD dependent oxidoreductase domain containing protein, expressed
LOC_Os04g45210	Chr4:26720071-26721360	0.953653	3.58292	1.9096	2.27929	0.0024	0.0184335	peroxisomal biogenesis factor 11, putative, expressed
LOC_Os05g49640	Chr5:28478296-28480387	0.737433	2.76949	1.90904	2.58095	0.00045	0.00480686	expressed protein
LOC_Os04g51280	Chr4:30377261-30379530	9.96883	37.41	1.90793	4.25476	5e-05	0.00072992	DAG protein, chloroplast precursor, putative, expressed
LOC_Os03g42240	Chr3:23499434-23503720	0.597333	2.24033	1.9071	2.38628	0.0012	0.0107172	B3 DNA binding domain containing protein, expressed
LOC_Os01g13480	Chr1:7517209-7518741	2.85041	10.6667	1.90387	3.93383	5e-05	0.00072992	glutaredoxin, putative, expressed
LOC_Os05g39120	Chr5:22937304-22940688	0.579151	2.16689	1.90361	2.08493	0.00095	0.00888084	expressed protein
LOC_Os10g37180	Chr10:19894707-19896859	1.62319	6.07046	1.90297	2.2993	0.0005	0.0052468	glycine cleavage system H protein, putative, expressed
LOC_Os03g47010	Chr3:26576495-26579282	1.12813	4.2188	1.90289	3.1058	5e-05	0.00072992	glycosyl hydrolase family 10 protein, putative, expressed
LOC_Os04g50176	Chr4:29938911-29939952	1.13088	4.22663	1.90207	2.514	0.0023	0.017873	expressed protein
LOC_Os11g45710	Chr11:27648701-27655231	0.394033	1.47066	1.90007	2.18277	0.00075	0.00738829	Os11bglu36 SFR2 homologue, expressed
LOC_Os12g23180	Chr12:13103625-13106311	2.322	8.65753	1.89859	3.21642	5e-05	0.00072992	3-beta hydroxysteroid dehydrogenase/isomerase family protein, putative, expressed
LOC_Os09g21120	Chr9:12746533-12749125	3.18755	11.8828	1.89836	5.06338	5e-05	0.00072992	armadillo/beta-catenin repeat family protein, putative, expressed
LOC_Os05g22614	Chr5:12833458-12839420	1.58137	5.88733	1.89644	2.68195	0.0001	0.00135054	PTAC16, putative, expressed
LOC_Os01g71190	Chr1:41186973-41188839	5.8462	21.7514	1.89554	3.47848	5e-05	0.00072992	photosystem II reaction center PSB28 protein, chloroplast precursor, putative, expressed
LOC_Os06g47130	Chr6:28558291-28564762	1.48138	5.50697	1.89432	3.36602	5e-05	0.00072992	C2 domain containing protein, expressed
LOC_Os06g01210	Chr6:149383-150246	43.9749	163.208	1.89196	4.5371	5e-05	0.00072992	plastocyanin, chloroplast precursor, putative, expressed
LOC_Os03g41060	Chr3:22816932-22817775	2.17622	8.07323	1.89132	2.25954	0.0019	0.0154399	GASR2 - Gibberellin-regulated GASA/GAST/Snakin family protein precursor, putative, expressed
LOC_Os02g02780	Chr2:1050785-1056830	3.55783	13.1898	1.89036	4.23036	5e-05	0.00072992	protein kinase family protein, putative, expressed
LOC_Os12g37519	Chr12:23025354-23028137	18.4951	68.5499	1.89001	4.61881	5e-05	0.00072992	retrotransposon protein, putative, unclassified, expressed
LOC_Os02g54530	Chr2:33405034-33405605	5.21271	19.3112	1.88933	2.76256	0.0002	0.00243581	SCP-like extracellular protein, expressed
LOC_Os08g42630	Chr8:26945671-26946675	4.3153	15.9698	1.88781	3.43781	5e-05	0.00072992	expressed protein
LOC_Os06g41860	Chr6:25098249-25099153	1.69726	6.2641	1.8839	2.78344	0.0012	0.0107172	DNA binding protein, putative, expressed
LOC_Os02g49690	Chr2:30364404-30365822	1.1395	4.2052	1.88378	2.29192	0.00105	0.0096341	ACT domain-containing protein, putative, expressed
LOC_Os03g20100	Chr3:11351430-11355773	5.34687	19.7313	1.88372	3.99277	5e-05	0.00072992	S1 RNA binding domain containing protein, expressed
LOC_Os02g40330	Chr2:24409308-24414084	9.87157	36.4101	1.88299	4.19354	5e-05	0.00072992	retrotransposon protein, putative, Ty3-gypsy subclass, expressed
LOC_Os01g17470	Chr1:10048263-10050309	9.69369	35.6773	1.87989	4.56353	5e-05	0.00072992	plastocyanin-like domain containing protein, putative, expressed
LOC_Os01g12110	Chr1:6590898-6592136	4.29701	15.8137	1.87977	3.20435	5e-05	0.00072992	expressed protein
LOC_Os02g35329	Chr2:21250125-21251323	1.96114	7.18593	1.87349	2.8652	5e-05	0.00072992	RING-H2 finger protein ATL3F, putative, expressed
LOC_Os07g02460	Chr7:848965-849761	20.4289	74.8432	1.87326	4.59949	5e-05	0.00072992	expressed protein
LOC_Os06g02019	Chr6:580664-586450	2.75533	10.0849	1.87189	3.81132	5e-05	0.00072992	cytochrome P450, putative, expressed
LOC_Os12g05210	Chr12:2312449-2313272	4.72154	17.2759	1.87143	3.35684	5e-05	0.00072992	expressed protein
LOC_Os01g46040	Chr1:26173184-26177230	2.06726	7.56216	1.87108	2.95869	0.0002	0.00243581	bromodomain domain containing protein, expressed
LOC_Os07g40000	Chr7:23996514-23997565	16.62	60.7002	1.86878	5.4158	5e-05	0.00072992	DUF260 domain containing protein, putative, expressed
LOC_Os07g24230	Chr7:13776866-13780339	0.346688	1.26602	1.86859	1.89924	0.0046	0.0302558	integral membrane transporter family protein, putative, expressed
LOC_Os03g17174	Chr3:9555523-9557435	1.69302	6.17551	1.86696	2.39244	0.00045	0.00480686	PsbP, putative, expressed
LOC_Os04g38410	Chr4:22835895-22837594	25.5003	92.9404	1.86579	4.45988	5e-05	0.00072992	chlorophyll A-B binding protein, putative, expressed
LOC_Os01g47350	Chr1:27050848-27054604	3.04566	11.0884	1.86422	3.40312	5e-05	0.00072992	enoyl-CoA hydratase/isomerase family protein, putative, expressed
LOC_Os01g41770	Chr1:23639653-23642880	0.33167	1.20664	1.86317	2.25185	0.0017	0.0141133	leucine rich repeat protein, putative, expressed
LOC_Os10g40460	Chr10:21667260-21667939	21.8461	79.4143	1.86202	3.37693	5e-05	0.00072992	LTPL141 - Protease inhibitor/seed storage/LTP family protein precursor, expressed
LOC_Os02g38240	Chr2:23126899-23129919	1.40302	5.09478	1.86049	2.39026	0.0004	0.0043648	rhodanese family protein, putative, expressed
LOC_Os02g07170	Chr2:3682191-3684126	3.21852	11.6284	1.85319	3.02147	5e-05	0.00072992	MYB family transcription factor, putative, expressed
LOC_Os05g48630	Chr5:27878555-27879619	30.3562	109.213	1.84708	4.34663	5e-05	0.00072992	expressed protein
LOC_Os06g45060	Chr6:27261293-27262594	38.0554	136.912	1.84707	5.88577	5e-05	0.00072992	expressed protein
LOC_Os01g10890	Chr1:5809556-5811617	1.11581	4.00961	1.84537	2.96638	5e-05	0.00072992	CAMK_KIN1/SNF1/Nim1_like.8 - CAMK includes calcium/calmodulin depedent protein kinases, expressed
LOC_Os04g31760	Chr4:19004896-19005663	2.00482	7.20402	1.84533	2.21257	0.00175	0.0144328	expressed protein
LOC_Os08g09000	Chr8:5238998-5240148	26.887	96.5273	1.84403	4.20168	5e-05	0.00072992	Cupin domain containing protein, expressed
LOC_Os01g61070	Chr1:35332704-35333504	5.55809	19.935	1.84264	2.45794	0.0005	0.0052468	heavy metal-associated domain containing protein, expressed
LOC_Os01g07050	Chr1:3317553-3318111	8.5179	30.4897	1.83975	3.00476	5e-05	0.00072992	POEI42 - Pollen Ole e I allergen and extensin family protein precursor, expressed
LOC_Os12g41390	Chr12:25641842-25645708	58.6934	210.076	1.83964	5.53401	5e-05	0.00072992	homocysteine S-methyltransferase protein, putative, expressed
LOC_Os06g44540	Chr6:26904390-26908175	0.303913	1.08759	1.8394	1.84828	0.00425	0.0287071	HOTHEAD precursor, putative, expressed
LOC_Os03g12020	Chr3:6295471-6297624	7.89125	28.239	1.83936	3.7453	5e-05	0.00072992	50S ribosomal protein L15, chloroplast precursor, putative, expressed
LOC_Os07g37240	Chr7:22316267-22317936	23.6823	84.6878	1.83835	3.97298	5e-05	0.00072992	chlorophyll A-B binding protein, putative, expressed
LOC_Os04g44340	Chr4:26257955-26259833	0.888696	3.17628	1.83758	2.1881	0.0009	0.00853065	expressed protein
LOC_Os02g49920	Chr2:30500229-30502289	1.08391	3.86854	1.83555	2.97139	0.0001	0.00135054	3-ketoacyl-CoA synthase, putative, expressed
LOC_Os04g34460	Chr4:20873335-20876370	0.621543	2.21814	1.83543	2.05546	0.0011	0.010008	PAP fibrillin family domain containing protein, expressed
LOC_Os03g21370	Chr3:12219823-12223237	10.5127	37.4545	1.833	4.08422	5e-05	0.00072992	expressed protein
LOC_Os01g28690	Chr1:16061946-16067662	0.73578	2.61963	1.83202	2.56045	0.0001	0.00135054	nucleoporin autopeptidase domain containing protein, expressed
LOC_Os04g34600	Chr4:20934818-20936052	1.9993	7.10106	1.82854	2.94422	5e-05	0.00072992	abscisic stress-ripening, putative, expressed
LOC_Os04g55130	Chr4:32777631-32779131	0.631396	2.23863	1.826	2.0204	0.00495	0.0319316	expressed protein
LOC_Os02g39710	Chr2:23989749-23991293	10.5831	37.4593	1.82356	5.63047	5e-05	0.00072992	CCT/B-box zinc finger protein, putative, expressed
LOC_Os05g38570	Chr5:22625114-22629028	1.17007	4.14087	1.82334	2.83205	5e-05	0.00072992	riboflavin biosynthesis protein ribAB, chloroplast precursor, putative, expressed
LOC_Os02g18630	Chr2:10857551-10859012	0.538398	1.90415	1.82241	1.94891	0.00545	0.0343111	OsFBX44 - F-box domain containing protein, expressed
LOC_Os06g24070	Chr6:14078257-14082303	2.58514	9.13519	1.82119	3.5633	5e-05	0.00072992	myb-like DNA-binding domain containing protein, expressed
LOC_Os02g37360	Chr2:22572213-22573341	4.03483	14.2473	1.82011	2.30505	0.0003	0.00344573	expressed protein
LOC_Os09g34920	Chr9:20348938-20350901	1.09977	3.88255	1.8198	3.26706	0.0003	0.00344573	glycosyl hydrolase family 29, putative, expressed
LOC_Os01g58194	Chr1:33641953-33650995	12.7065	44.8345	1.81904	5.00659	5e-05	0.00072992	protein disulfide isomerase, putative, expressed
LOC_Os03g04060	Chr3:1860426-1861786	19.3235	68.177	1.81893	4.41563	5e-05	0.00072992	CHIT16 - Chitinase family protein precursor, expressed
LOC_Os04g33830	Chr4:20495974-20497051	28.1519	99.1145	1.81587	4.15537	5e-05	0.00072992	membrane protein, putative, expressed
LOC_Os02g47020	Chr2:28701803-28704409	5.37844	18.9181	1.81451	4.17287	5e-05	0.00072992	phosphoribulokinase/Uridine kinase family protein, expressed
LOC_Os11g05360	Chr11:2379138-2380413	2.84889	10.0191	1.81429	3.33311	0.00015	0.00189973	RCLEA9 - Root cap and Late embryogenesis related family protein precursor, putative, expressed
LOC_Os06g36390	Chr6:21372362-21377313	3.30893	11.6268	1.81301	1.97605	0.00365	0.0254858	expressed protein
LOC_Os08g43620	Chr8:27582996-27584064	1.53902	5.40641	1.81266	2.32709	0.0004	0.0043648	expressed protein
LOC_Os01g67820	Chr1:39411189-39413062	0.910903	3.19209	1.80913	2.67182	0.00045	0.00480686	exo70 exocyst complex subunit domain containing protein, expressed
LOC_Os03g48050	Chr3:27314272-27316175	0.876628	3.06704	1.80681	1.95135	0.00545	0.0343111	RNA methyltransferase, TrmH family protein, putative, expressed
LOC_Os01g51050	Chr1:29323219-29324340	2.67527	9.34697	1.80482	2.25177	0.0006	0.00612607	jacalin-like lectin domain containing protein, expressed
LOC_Os09g37690	Chr9:21724338-21726152	2.14251	7.47932	1.80361	3.39049	5e-05	0.00072992	flavin-containing monooxygenase family protein, putative, expressed
LOC_Os10g39110	Chr10:20846282-20847507	1.99734	6.96988	1.80306	2.37923	0.0022	0.0172309	expansin precursor, putative, expressed
LOC_Os01g62980	Chr1:36479578-36484818	10.1498	35.3571	1.80054	2.33146	0.00205	0.01633	LTPL101 - Protease inhibitor/seed storage/LTP family protein precursor, expressed
LOC_Os10g31710	Chr10:16621127-16621703	6.29798	21.9014	1.79806	2.64409	5e-05	0.00072992	glycine-rich cell wall structural protein 2 precursor, putative, expressed
LOC_Os07g43390	Chr7:25980424-25984955	15.8126	54.9449	1.79691	5.07471	5e-05	0.00072992	4-alpha-glucanotransferase, chloroplast precursor, putative, expressed
LOC_Os03g16334	Chr3:9011582-9016580	7.64416	26.4887	1.79295	4.85334	5e-05	0.00072992	fringe-related protein, putative, expressed
LOC_Os04g31040	Chr4:18551237-18553801	0.62312	2.15614	1.79087	2.29561	0.0007	0.00697948	violaxanthin de-epoxidase, putative, expressed
LOC_Os09g11630	Chr9:6490597-6496754	0.161235	0.556189	1.78641	2.22193	0.0084	0.0471819	retrotransposon protein, putative, unclassified, expressed
LOC_Os07g37550	Chr7:22487420-22488766	31.1263	107.336	1.78592	4.08814	5e-05	0.00072992	chlorophyll A-B binding protein, putative, expressed
LOC_Os10g08018	Chr10:4338813-4340390	0.763777	2.63356	1.78579	2.2011	0.00205	0.01633	expressed protein
LOC_Os01g68680	Chr1:39881006-39890797	2.8987	9.94356	1.77835	4.36317	5e-05	0.00072992	tetratricopeptide repeat domain containing protein, expressed
LOC_Os03g18540	Chr3:10381357-10387602	1.30492	4.47546	1.77807	3.04176	5e-05	0.00072992	expressed protein
LOC_Os05g38530	Chr5:22599354-22602579	13.3699	45.8487	1.77789	4.94354	5e-05	0.00072992	DnaK family protein, putative, expressed
LOC_Os02g49880	Chr2:30471979-30475773	0.50608	1.73531	1.77775	1.77175	0.00475	0.0309602	CCT/B-box zinc finger protein, putative, expressed
LOC_Os12g24020	Chr12:13657098-13658780	46.7084	160.097	1.7772	5.18838	5e-05	0.00072992	rhodanese-like domain containing protein, putative, expressed
LOC_Os02g32950	Chr2:19567631-19568968	11.0573	37.891	1.77686	3.49713	5e-05	0.00072992	RCN2 Centroradialis-like1 homologous to TFL1 gene; contains Pfam profile PF01161: Phosphatidylethanolamine-binding protein, expressed
LOC_Os04g24319	Chr4:13936563-13937522	1.16609	3.97658	1.76985	1.62878	0.00875	0.0486429	jasmonate-induced protein, putative, expressed
LOC_Os03g64020	Chr3:36180581-36183152	2.40438	8.1852	1.76735	3.03454	5e-05	0.00072992	expressed protein
LOC_Os08g37130	Chr8:23463932-23468392	1.6683	5.67809	1.76703	2.56996	0.00025	0.00295117	oxidoreductase, short chain dehydrogenase/reductase family domain containing protein, expressed
LOC_Os07g36430	Chr7:21798278-21798902	3.21143	10.9223	1.76598	2.08198	0.0017	0.0141133	expressed protein
LOC_Os05g26210	Chr5:15250976-15251690	1.57431	5.34392	1.76318	2.26843	0.0057	0.0354445	ATOFP17/OFP17, putative, expressed
LOC_Os03g39610	Chr3:21999941-22001714	26.4462	89.7365	1.76263	3.79338	5e-05	0.00072992	chlorophyll A-B binding protein, putative, expressed
LOC_Os01g66980	Chr1:38900544-38902752	1.13291	3.83607	1.75959	2.01241	0.0022	0.0172309	expressed protein
LOC_Os08g33150	Chr8:20600430-20601995	0.528292	1.78842	1.75928	1.70778	0.0054	0.0340684	MYB family transcription factor, putative, expressed
LOC_Os01g16120	Chr1:9088087-9089111	3.33588	11.2871	1.75853	3.31365	0.00025	0.00295117	zinc finger, C3HC4 type domain containing protein, expressed
LOC_Os11g37970	Chr11:22511505-22512404	240.464	813.511	1.75834	4.95551	5e-05	0.00072992	WIP5 - Wound-induced protein precursor, expressed
LOC_Os05g27100	Chr5:15770496-15773664	4.21214	14.2227	1.75557	2.87171	5e-05	0.00072992	expressed protein
LOC_Os02g42810	Chr2:25734460-25736672	2.38692	8.05347	1.75446	2.92904	5e-05	0.00072992	oxidoreductase, short chain dehydrogenase/reductase family domain containing protein, expressed
LOC_Os02g51750	Chr2:31698160-31700503	92.1993	310.234	1.75053	5.0155	5e-05	0.00072992	annexin, putative, expressed
LOC_Os12g43110	Chr12:26768219-26768893	3.45415	11.6159	1.7497	2.51666	0.00155	0.0131947	OsSAUR58 - Auxin-responsive SAUR gene family member, expressed
LOC_Os03g60560	Chr3:34424179-34425104	6.70113	22.4807	1.74621	2.88664	5e-05	0.00072992	ZOS3-21 - C2H2 zinc finger protein, expressed
LOC_Os07g44410	Chr7:26542979-26545183	173.894	582.923	1.74509	6.02242	5e-05	0.00072992	WD40-like Beta Propeller Repeat family protein, expressed
LOC_Os01g49720	Chr1:28568720-28569792	20.9335	70.1538	1.74471	4.52593	5e-05	0.00072992	glutathione S-transferase, putative, expressed
LOC_Os08g44680	Chr8:28083292-28084298	33.7446	112.84	1.74155	4.34635	5e-05	0.00072992	photosystem I reaction center subunit II, chloroplast precursor, putative, expressed
LOC_Os03g17070	Chr3:9491413-9492494	21.6427	72.2576	1.73927	4.47122	5e-05	0.00072992	ATP synthase B chain, chloroplast precursor, putative, expressed
LOC_Os10g34920	Chr10:18637488-18638521	8.58991	28.6682	1.73873	4.02936	5e-05	0.00072992	secretory protein, putative, expressed
LOC_Os05g50770	Chr5:29119643-29121884	0.345652	1.15144	1.73604	1.96157	0.0074	0.0430582	C4-dicarboxylate transporter/malic acid transport protein, expressed
LOC_Os01g14514	Chr1:8130246-8131090	2.9627	9.85844	1.73445	2.36236	0.00165	0.013809	expressed protein
LOC_Os02g17920	Chr2:10378454-10380939	0.497393	1.64694	1.72733	1.77411	0.0015	0.0128149	glyoxalase family protein, putative, expressed
LOC_Os01g42860	Chr1:24392840-24393423	211.547	699.299	1.72493	4.91361	5e-05	0.00072992	inhibitor I family protein, putative, expressed
LOC_Os03g50310	Chr3:28686957-28689716	2.5282	8.34059	1.72204	3.25019	5e-05	0.00072992	CCT/B-box zinc finger protein, putative, expressed
LOC_Os05g35470	Chr5:21078432-21079880	4.24871	14.0094	1.7213	3.22928	5e-05	0.00072992	dienelactone hydrolase family protein, expressed
LOC_Os03g47210	Chr3:26722019-26722640	1.9617	6.45845	1.71908	2.01106	0.00425	0.0287071	expressed protein
LOC_Os05g07890	Chr5:4262640-4263514	3.2948	10.8436	1.71858	2.49843	0.00085	0.00814427	embryo-specific 3, putative, expressed
LOC_Os01g08860	Chr1:4449031-4449876	12.9294	42.4559	1.71531	3.97211	5e-05	0.00072992	hsp20/alpha crystallin family protein, putative, expressed
LOC_Os02g40530	Chr2:24580381-24582527	7.32136	24.0173	1.71389	4.04096	5e-05	0.00072992	MYB family transcription factor, putative, expressed
LOC_Os11g13890	Chr11:7659681-7662281	39.2344	128.539	1.71202	4.07616	5e-05	0.00072992	chlorophyll A-B binding protein, putative, expressed
LOC_Os05g29740	Chr5:17199644-17200631	0.914045	2.98711	1.70841	1.8483	0.00625	0.0379914	invertase/pectin methylesterase inhibitor family protein, putative, expressed
LOC_Os02g26470	Chr2:15543702-15544246	6.31132	20.615	1.70768	2.39636	0.00035	0.00391428	expressed protein
LOC_Os02g26480	Chr2:15549297-15558300	0.890177	2.90621	1.70698	2.16153	0.002	0.0160445	OsSCP7 - Putative Serine Carboxypeptidase homologue, expressed
LOC_Os03g55720	Chr3:31725101-31725900	20.8338	67.9516	1.70558	3.66892	5e-05	0.00072992	cytochrome b6f complex subunit, putative, expressed
LOC_Os03g20330	Chr3:11497785-11498677	4.91426	16.0231	1.70511	2.77306	5e-05	0.00072992	VQ domain containing protein, putative, expressed
LOC_Os03g22120	Chr3:12674461-12680657	29.9602	97.2569	1.69875	4.77288	5e-05	0.00072992	sucrose synthase, putative, expressed
LOC_Os07g27390	Chr7:15938294-15941058	2.14016	6.94726	1.69872	3.40487	5e-05	0.00072992	retrotransposon protein, putative, unclassified, expressed
LOC_Os11g04900	Chr11:2087796-2089433	0.530208	1.71849	1.69651	2.02161	0.0024	0.0184335	glycoprotein X precursor, putative, expressed
LOC_Os03g02020	Chr3:636724-639459	0.54937	1.76827	1.68649	1.65457	0.00525	0.0334142	stress responsive A/B Barrel domain containing protein, expressed
LOC_Os03g39830	Chr3:22150322-22151612	5.81508	18.6807	1.68368	3.02184	5e-05	0.00072992	expressed protein
LOC_Os02g19924	Chr2:11716854-11736546	6.89162	22.1312	1.68317	4.05506	5e-05	0.00072992	aminotransferase, classes I and II, domain containing protein, expressed
LOC_Os06g20200	Chr6:11586342-11588079	1.45444	4.67063	1.68315	2.7872	0.00095	0.00888084	gibberellin receptor GID1L2, putative, expressed
LOC_Os07g43810	Chr7:26211744-26214023	19.5687	62.8085	1.68242	4.39325	5e-05	0.00072992	RNA recognition motif containing protein, putative, expressed
LOC_Os04g41340	Chr4:24527896-24530505	1.85776	5.95802	1.68127	2.5861	5e-05	0.00072992	4-nitrophenylphosphatase, putative, expressed
LOC_Os05g43310	Chr5:25193457-25194714	1.1627	3.71851	1.67725	1.69816	0.00855	0.0478101	photosystem II reaction center W protein, chloroplast precursor, putative, expressed
LOC_Os02g05470	Chr2:2638416-2642111	4.2955	13.7287	1.67629	3.6948	5e-05	0.00072992	CCT motif family protein, expressed
LOC_Os01g72810	Chr1:42238810-42240567	0.979277	3.12965	1.67621	2.58667	0.00115	0.0103875	secreted glycoprotein, putative, expressed
LOC_Os03g43880	Chr3:24616321-24617923	3.46201	11.0538	1.67485	4.04019	5e-05	0.00072992	PLA IIIA/PLP7, putative, expressed
LOC_Os03g22960	Chr3:13263132-13264464	9.22357	29.4407	1.67442	3.2411	5e-05	0.00072992	expressed protein
LOC_Os03g04770	Chr3:2272964-2276401	22.9437	73.1864	1.67348	5.09621	5e-05	0.00072992	beta-amylase, putative, expressed
LOC_Os02g26210	Chr2:15397393-15398605	5.0571	16.123	1.67274	3.11634	5e-05	0.00072992	flowering promoting factor-like 1, putative, expressed
LOC_Os09g20000	Chr9:11976354-11978024	5.50531	17.5119	1.66944	3.08543	5e-05	0.00072992	heavy metal-associated domain containing protein, expressed
LOC_Os04g52670	Chr4:31349655-31350722	3.83306	12.1747	1.66731	2.93189	5e-05	0.00072992	OsSAUR21 - Auxin-responsive SAUR gene family member, expressed
LOC_Os08g25734	Chr8:15666200-15672594	14.6513	46.5132	1.66662	4.77373	5e-05	0.00072992	glucose-1-phosphate adenylyltransferase large subunit, chloroplast precursor, putative, expressed
LOC_Os08g41040	Chr8:25952896-25954768	4.40168	13.9678	1.66597	3.02995	5e-05	0.00072992	expressed protein
LOC_Os06g15400	Chr6:8751273-8752628	12.5971	39.9448	1.66491	3.46774	5e-05	0.00072992	expressed protein
LOC_Os01g43120	Chr1:24598180-24601892	3.40232	10.7844	1.66435	3.71723	5e-05	0.00072992	DEAD/DEAH box helicase, putative, expressed
LOC_Os10g33540	Chr10:17682550-17684961	0.565523	1.78898	1.66148	2.27401	0.00265	0.0199294	alcohol oxidase, putative, expressed
LOC_Os08g30900	Chr8:19070539-19076379	0.454861	1.43439	1.65694	2.45139	0.0004	0.0043648	YDG/SRA domain containing protein, expressed
LOC_Os01g13390	Chr1:7457834-7459959	3.10983	9.80564	1.65677	2.66909	5e-05	0.00072992	expressed protein
LOC_Os02g18990	Chr2:11093809-11097793	0.760864	2.39796	1.6561	1.51073	0.0054	0.0340684	GDSL-like lipase/acylhydrolase, putative, expressed
LOC_Os01g57599	Chr1:33302678-33304543	0.775624	2.44203	1.65465	2.10336	0.0011	0.010008	retrotransposon protein, putative, unclassified, expressed
LOC_Os10g15300	Chr10:8000556-8001417	1.76677	5.55978	1.65392	1.81168	0.00275	0.0204362	expressed protein
LOC_Os09g20220	Chr9:12120285-12121335	80.0027	251.578	1.65289	5.27398	5e-05	0.00072992	glutathione S-transferase, putative, expressed
LOC_Os02g41760	Chr2:25103333-25105616	0.595444	1.87206	1.65259	1.94299	0.0031	0.0224896	NB-ARC domain containing protein, expressed
LOC_Os08g42850	Chr8:27090850-27093355	1.55239	4.87852	1.65196	2.09978	0.00055	0.00566905	peptidyl-prolyl cis-trans isomerase, FKBP-type, putative, expressed
LOC_Os03g19980	Chr3:11252326-11259529	0.993966	3.11765	1.64919	2.66912	5e-05	0.00072992	tetratricopeptide-like helical, putative, expressed
LOC_Os01g09540	Chr1:4872118-4873806	9.70215	30.4081	1.64808	3.81325	5e-05	0.00072992	HAD superfamily phosphatase, putative, expressed
LOC_Os06g45184	Chr6:27319470-27322662	2.5377	7.95296	1.64797	2.41391	0.0005	0.0052468	retrotransposon protein, putative, Ty3-gypsy subclass, expressed
LOC_Os01g50700	Chr1:29119760-29124636	0.346623	1.08516	1.64647	1.66565	0.006	0.0368861	dehydrin family protein, expressed
LOC_Os07g46480	Chr7:27746307-27748010	8.47656	26.5224	1.64566	4.79981	5e-05	0.00072992	eukaryotic aspartyl protease domain containing protein, expressed
LOC_Os03g34040	Chr3:19412907-19417098	9.05954	28.2441	1.64044	3.83559	5e-05	0.00072992	ribosomal protein, putative, expressed
LOC_Os08g32630	Chr8:20208859-20218837	2.65133	8.26311	1.63997	3.33419	5e-05	0.00072992	FAD dependent oxidoreductase, putative, expressed
LOC_Os01g69030	Chr1:40101403-40107186	2.00688	6.24187	1.63702	3.65434	5e-05	0.00072992	sucrose-phosphate synthase, putative, expressed
LOC_Os03g16430	Chr3:9064855-9068078	1.1674	3.62544	1.63485	2.52373	5e-05	0.00072992	RNA polymerase sigma factor, putative, expressed
LOC_Os07g36910	Chr7:22101916-22105152	0.372895	1.15723	1.63383	1.73126	0.0087	0.0484668	OsFBX254 - F-box domain containing protein, expressed
LOC_Os04g58310	Chr4:34706680-34707954	1.40178	4.34753	1.63294	2.00658	0.00305	0.0221945	CBS domain-containing protein, putative, expressed
LOC_Os06g36840	Chr6:21700477-21703430	1.63329	5.06031	1.63144	2.66541	0.00015	0.00189973	cysteine synthase, putative, expressed
LOC_Os11g31060	Chr11:18070198-18071815	3.08641	9.53898	1.62791	3.52083	5e-05	0.00072992	IQ calmodulin-binding and BAG domain containing protein, putative, expressed
LOC_Os12g01449	Chr12:273545-282070	0.438136	1.34944	1.62291	2.20234	0.0007	0.00697948	chloroplast unusual positioning protein, putative, expressed
LOC_Os08g04340	Chr8:2129612-2130615	2.6003	8.00755	1.62268	1.92247	0.0022	0.0172309	plastocyanin-like domain containing protein, putative, expressed
LOC_Os05g34830	Chr5:20678000-20680343	15.0138	46.1572	1.62027	4.86656	5e-05	0.00072992	No apical meristem protein, putative, expressed
LOC_Os11g09680	Chr11:5168779-5171223	0.592509	1.81988	1.61894	1.59955	0.0081	0.0459631	expressed protein
LOC_Os12g40260	Chr12:24915509-24917030	3.72065	11.4269	1.6188	3.60579	5e-05	0.00072992	WD-40 repeat family protein, putative, expressed
LOC_Os07g39250	Chr7:23497078-23500287	0.477485	1.46527	1.61764	2.26415	0.00115	0.0103875	expressed protein
LOC_Os03g01870	Chr3:524007-525278	0.910749	2.79333	1.61686	1.67513	0.0074	0.0430582	no apical meristem protein, putative, expressed
LOC_Os07g44480	Chr7:26561531-26563360	3.69587	11.3206	1.61496	3.50643	5e-05	0.00072992	peroxidase, putative, expressed
LOC_Os01g28500	Chr1:15958734-15959500	21.8462	66.8337	1.6132	3.62022	5e-05	0.00072992	SCP-like extracellular protein, expressed
LOC_Os08g40160	Chr8:25416105-25418793	3.52951	10.7962	1.61298	2.90776	5e-05	0.00072992	thylakoid lumen protein, chloroplast precursor, putative, expressed
LOC_Os03g50270	Chr3:28651106-28653092	7.32996	22.3332	1.60731	3.37358	5e-05	0.00072992	expressed protein
LOC_Os03g06020	Chr3:3006329-3007331	4.03755	12.2997	1.60707	2.60785	0.00015	0.00189973	expansin precursor, putative, expressed
LOC_Os03g60100	Chr3:34174772-34176702	11.6659	35.523	1.60646	3.54102	5e-05	0.00072992	50S ribosomal protein L17, putative, expressed
LOC_Os02g03710	Chr2:1558478-1559143	17.1116	52.089	1.606	3.7431	5e-05	0.00072992	UP-9A, putative, expressed
LOC_Os02g45040	Chr2:27296969-27300115	13.9898	42.5309	1.60414	4.52653	5e-05	0.00072992	retrotransposon protein, putative, unclassified, expressed
LOC_Os02g13220	Chr2:7044616-7046245	0.529166	1.60872	1.60413	1.51265	0.00875	0.0486429	F-box family protein, putative, expressed
LOC_Os01g74450	Chr1:43115741-43117231	29.0983	88.4559	1.60403	4.78789	5e-05	0.00072992	aquaporin protein, putative, expressed
LOC_Os07g04820	Chr7:2131759-2133500	1.38334	4.20084	1.60252	2.30587	0.0009	0.00853065	protein kinase, putative, expressed
LOC_Os04g25740	Chr4:14927224-14929680	0.835762	2.53488	1.60075	2.32593	0.0004	0.0043648	expressed protein
LOC_Os02g52170	Chr2:31932282-31933316	2.2128	6.70925	1.60028	2.22413	0.0005	0.0052468	expressed protein
LOC_Os06g06440	Chr6:2999106-3009250	0.860511	2.60341	1.59714	2.63503	0.0003	0.00344573	ABC transporter, ATP-binding protein, putative, expressed
LOC_Os12g37980	Chr12:23337899-23344845	7.59287	22.969	1.59697	4.74635	5e-05	0.00072992	protein kinase domain containing protein, expressed
LOC_Os12g35630	Chr12:21660650-21669379	2.72826	8.23913	1.59451	2.74922	5e-05	0.00072992	elongation factor TS family protein, expressed
LOC_Os11g31190	Chr11:18171677-18174478	57.6284	173.845	1.59295	5.07075	5e-05	0.00072992	nodulin MtN3 family protein, putative, expressed
LOC_Os02g45690	Chr2:27798047-27805631	3.82997	11.5503	1.59253	3.62723	5e-05	0.00072992	uncharacterized mscS family protein, putative, expressed
LOC_Os06g04150	Chr6:1733934-1735135	1.94559	5.86286	1.59139	2.21896	0.0007	0.00697948	magnesium-protoporphyrin O-methyltransferase, putative, expressed
LOC_Os06g28950	Chr6:16504513-16505369	6.56708	19.7678	1.58983	3.0304	5e-05	0.00072992	expressed protein
LOC_Os05g47442	Chr5:27177893-27178615	1.52943	4.59797	1.588	1.77987	0.00905	0.0498451	expressed protein
LOC_Os05g49170	Chr5:28213807-28216045	4.75582	14.268	1.58501	2.77062	5e-05	0.00072992	cold acclimation protein WCOR413, putative, expressed
LOC_Os05g38660	Chr5:22665338-22666007	8.39549	25.1721	1.58414	2.93661	0.0001	0.00135054	expressed protein
LOC_Os12g07110	Chr12:3483863-3489371	2.74541	8.22575	1.58312	3.50572	5e-05	0.00072992	acyl-CoA synthetase protein, putative, expressed
LOC_Os06g41070	Chr6:24531825-24533798	1.34918	4.04214	1.58303	2.85389	0.0038	0.0263247	cytochrome P450, putative, expressed
LOC_Os07g03020	Chr7:1133504-1135075	0.59462	1.78022	1.58202	1.71472	0.00435	0.0291019	expressed protein
LOC_Os09g37060	Chr9:21375812-21378577	2.24697	6.72489	1.58153	2.90652	0.0001	0.00135054	transposon protein, putative, unclassified, expressed
LOC_Os11g06150	Chr11:2932658-2933856	7.08514	21.2009	1.58126	3.2853	5e-05	0.00072992	basic proline-rich protein precursor, putative, expressed
LOC_Os06g17070	Chr6:9892372-9895168	1.34373	4.02084	1.58125	2.60468	0.0001	0.00135054	retrotransposon protein, putative, Ty1-copia subclass, expressed
LOC_Os02g46980	Chr2:28681680-28683849	1.26852	3.7955	1.58114	2.4367	0.00035	0.00391428	pentatricopeptide, putative, expressed
LOC_Os07g02980	Chr7:1110498-1112022	1.01717	3.0415	1.58023	2.0599	0.00245	0.018727	expressed protein
LOC_Os02g22260	Chr2:13280848-13292533	10.899	32.589	1.58019	3.62613	5e-05	0.00072992	fruit protein PKIWI502, putative, expressed
LOC_Os03g62630	Chr3:35444417-35446363	7.78486	23.2758	1.58009	3.12662	5e-05	0.00072992	ribosomal protein S6, putative, expressed
LOC_Os12g40300	Chr12:24957947-24961239	2.46152	7.33568	1.57538	2.14828	0.001	0.00925019	SKP1, putative, expressed
LOC_Os07g43160	Chr7:25867211-25871233	2.3508	7.0052	1.57527	2.66524	5e-05	0.00072992	uncharacterized glycosyl hydrolase Rv2006/MT2062, putative, expressed
LOC_Os05g30940	Chr5:17962033-17964352	1.44659	4.30482	1.5733	2.42597	0.00185	0.0150851	vacuolar calcium binding protein, putative, expressed
LOC_Os06g14324	Chr6:7983954-7990958	3.01152	8.9587	1.5728	2.59046	5e-05	0.00072992	caleosin related protein, putative, expressed
LOC_Os02g49326	Chr2:30144259-30148692	3.46514	10.3022	1.57196	3.19333	5e-05	0.00072992	SET domain-containing protein, putative, expressed
LOC_Os02g10350	Chr2:5442078-5447380	0.471838	1.40246	1.57159	1.68547	0.0042	0.0284177	MLO domain containing protein, putative, expressed
LOC_Os03g06460	Chr3:3228976-3233508	0.514187	1.52762	1.57092	2.14803	0.00065	0.00656619	type I inositol-1,4,5-trisphosphate 5-phosphatase, putative, expressed
LOC_Os07g05000	Chr7:2197572-2201446	0.709961	2.10466	1.56778	1.8285	0.0044	0.0292719	oxidoreductase, aldo/keto reductase family protein, putative, expressed
LOC_Os02g04369	Chr2:1928624-1929506	1.69301	5.01609	1.56697	1.77821	0.0046	0.0302558	expressed protein
LOC_Os08g31090	Chr8:19206657-19207921	2.39948	7.10245	1.5656	2.79861	0.00035	0.00391428	expressed protein
LOC_Os11g05614	Chr11:2550550-2553128	2.06508	6.10456	1.56369	3.10575	5e-05	0.00072992	no apical meristem protein, putative, expressed
LOC_Os07g35680	Chr7:21367968-21374694	2.53231	7.48497	1.56354	3.14722	5e-05	0.00072992	TKL_IRAK_DUF26-lc22 - DUF26 kinases have homology to DUF26 containing loci, expressed
LOC_Os02g08400	Chr2:4481871-4483470	1.33236	3.93182	1.56121	2.04743	0.00575	0.0356623	HLS, putative, expressed
LOC_Os06g41120	Chr6:24586163-24586853	32.2289	94.9757	1.5592	4.2033	5e-05	0.00072992	expressed protein
LOC_Os02g43470	Chr2:26240125-26242983	0.947232	2.78556	1.55618	1.8879	0.00525	0.0334142	glutamate dehydrogenase protein, putative, expressed
LOC_Os07g43740	Chr7:26173594-26174386	1.97565	5.78661	1.55039	1.91998	0.0058	0.0358976	zinc finger, C3HC4 type domain containing protein, expressed
LOC_Os07g06450	Chr7:3122610-3124604	2.46668	7.21416	1.54826	2.66942	5e-05	0.00072992	RNA recognition motif containing protein, putative, expressed
LOC_Os03g06390	Chr3:3194989-3196661	16.2127	47.3939	1.54758	4.05688	5e-05	0.00072992	expressed protein
LOC_Os04g36720	Chr4:22182598-22186943	1.17593	3.43204	1.54527	2.45063	0.00015	0.00189973	ferric-chelate reductase, putative, expressed
LOC_Os03g49630	Chr3:28260580-28266479	5.89409	17.198	1.5449	4.00181	5e-05	0.00072992	expressed protein
LOC_Os10g35810	Chr10:19146522-19150913	2.04623	5.94872	1.53961	2.55019	0.00015	0.00189973	thylakoid lumenal protein, putative, expressed
LOC_Os04g17100	Chr4:9367934-9369158	134.761	391.76	1.53957	4.632	5e-05	0.00072992	heavy metal-associated domain containing protein, expressed
LOC_Os10g28120	Chr10:14602522-14603702	118.264	343.791	1.53951	4.80556	5e-05	0.00072992	glycosyl hydrolase, putative, expressed
LOC_Os07g47100	Chr7:28164411-28169335	6.4533	18.7553	1.53919	3.71925	5e-05	0.00072992	transporter, monovalent cation:proton antiporter-2 family, putative, expressed
LOC_Os07g35300	Chr7:21128611-21132530	1.23108	3.57462	1.53787	2.39945	0.0004	0.0043648	TKL_IRAK_DUF26-lc.11 - DUF26 kinases have homology to DUF26 containing loci, expressed
LOC_Os01g36540	Chr1:20280854-20282564	0.567835	1.6484	1.53752	1.65293	0.00615	0.0375658	pentatricopeptide, putative, expressed
LOC_Os01g32780	Chr1:17990827-17993764	43.5273	126.315	1.53703	4.35493	5e-05	0.00072992	universal stress protein domain containing protein, putative, expressed
LOC_Os06g35960	Chr6:20996263-20998867	14.8307	42.9839	1.53521	4.1826	5e-05	0.00072992	HSF-type DNA-binding domain containing protein, expressed
LOC_Os01g19630	Chr1:11129420-11131876	5.98628	17.3167	1.53243	3.53456	5e-05	0.00072992	expressed protein
LOC_Os05g45030	Chr5:26175526-26177067	7.20145	20.8284	1.5322	3.49154	5e-05	0.00072992	calcium homeostasis regulator CHoR1, putative, expressed
LOC_Os02g38040	Chr2:22978829-22981571	0.89024	2.57475	1.53217	2.22879	0.0021	0.0166061	leucine-rich repeat family protein, putative, expressed
LOC_Os02g37834	Chr2:22835796-22838845	3.1717	9.16487	1.53086	2.00854	0.00135	0.0117355	expressed protein
LOC_Os03g05910	Chr3:2961745-2964306	121.625	351.252	1.53007	4.81428	5e-05	0.00072992	expressed protein
LOC_Os01g59090	Chr1:34139767-34141215	1.95361	5.63978	1.5295	2.16637	0.00075	0.00738829	thylakoid lumenal 20 kDa protein, putative, expressed
LOC_Os04g52100	Chr4:30945117-30948691	2.74614	7.92505	1.52902	2.83512	5e-05	0.00072992	peptidase, M24 family protein, putative, expressed
LOC_Os03g36540	Chr3:20247673-20250146	3.063	8.8321	1.52781	3.04291	5e-05	0.00072992	magnesium-chelatase subunit chlI, chloroplast precursor, putative, expressed
LOC_Os01g67810	Chr1:39408245-39410374	2.8237	8.13386	1.52636	3.21817	5e-05	0.00072992	transposon protein, putative, unclassified, expressed
LOC_Os12g08730	Chr12:4461673-4463096	18.9163	54.4746	1.52595	4.02644	5e-05	0.00072992	thioredoxin, putative, expressed
LOC_Os12g42660	Chr12:26507439-26513551	0.258935	0.744569	1.52382	1.7717	0.00675	0.04027	AGC_AGC_other_GWLd.1 - ACG kinases include homologs to PKA, PKG and PKC, expressed
LOC_Os04g32404	Chr4:19430044-19435390	1.40303	4.02315	1.51977	1.93576	0.0026	0.0196402	expressed protein
LOC_Os05g39000	Chr5:22878684-22882073	0.399332	1.14265	1.51672	2.08684	0.00135	0.0117355	KIP1, putative, expressed
LOC_Os10g01820	Chr10:529427-533602	0.349902	1.00114	1.51662	1.86665	0.00335	0.0239171	expressed protein
LOC_Os03g62780	Chr3:35520539-35523897	0.811632	2.32174	1.51631	1.85613	0.0026	0.0196402	S1 RNA binding domain containing protein, expressed
LOC_Os03g61220	Chr3:34765938-34772346	8.58808	24.5606	1.51594	4.10099	5e-05	0.00072992	DEAD-box ATP-dependent RNA helicase 3, putative, expressed
LOC_Os01g53430	Chr1:30694908-30696710	0.80898	2.31142	1.5146	2.11603	0.0035	0.0247212	anthocyanidin 5,3-O-glucosyltransferase, putative, expressed
LOC_Os04g54830	Chr4:32605091-32608651	9.81801	28.0168	1.51279	4.26082	5e-05	0.00072992	expressed protein
LOC_Os02g21810	Chr2:12970221-12972230	1.04078	2.96857	1.5121	2.21512	0.0012	0.0107172	cytochrome P450 51, putative, expressed
LOC_Os10g39160	Chr10:20895705-20896832	7.0452	20.0665	1.51007	3.4434	0.0001	0.00135054	peroxidase precursor, putative, expressed
LOC_Os12g13110	Chr12:7289213-7291739	0.551178	1.5692	1.50944	1.77357	0.0065	0.0391216	pentatricopeptide, putative, expressed
LOC_Os03g20640	Chr3:11677889-11680211	5.51652	15.6928	1.50827	3.08297	5e-05	0.00072992	expressed protein
LOC_Os05g41640	Chr5:24378360-24381762	14.7163	41.7874	1.50565	3.90799	5e-05	0.00072992	phosphoglycerate kinase protein, putative, expressed
LOC_Os01g52110	Chr1:29965063-29970767	51.1888	145.291	1.50505	4.28122	5e-05	0.00072992	RING finger and CHY zinc finger domain-containing protein 1, putative, expressed
LOC_Os02g12750	Chr2:6677114-6680136	22.3658	63.4769	1.50494	4.52481	5e-05	0.00072992	tetraspanin family protein, putative, expressed
LOC_Os08g14200	Chr8:8488369-8489922	8.01724	22.7293	1.50338	3.22948	5e-05	0.00072992	glycosyl hydrolases family 16, putative, expressed
LOC_Os05g47510	Chr5:27219014-27220337	6.1528	17.4381	1.50292	3.45429	5e-05	0.00072992	pentatricopeptide, putative, expressed
LOC_Os05g38770	Chr5:22745075-22747649	1.95549	5.53889	1.50207	2.77159	0.0002	0.00243581	protein kinase APK1B, chloroplast precursor, putative, expressed
LOC_Os11g24450	Chr11:13941556-13945519	1.11772	3.16555	1.5019	1.86319	0.003	0.021911	mitochondrial carrier protein, putative, expressed
LOC_Os01g09280	Chr1:4714467-4718746	11.5855	32.8068	1.50168	4.08177	5e-05	0.00072992	myb-related transcription activator, putative, expressed
LOC_Os10g38740	Chr10:20633311-20634954	113.932	322.449	1.5009	4.51898	5e-05	0.00072992	glutathione S-transferase, putative, expressed
LOC_Os01g68300	Chr1:39682833-39683442	20.6632	58.474	1.50073	3.34768	5e-05	0.00072992	expressed protein
LOC_Os03g52810	Chr3:30281982-30288140	0.231379	0.654088	1.49923	2.02163	0.00355	0.0250075	retrotransposon protein, putative, unclassified, expressed
LOC_Os11g47500	Chr11:28723112-28724027	7.83088	22.1167	1.49789	2.86272	5e-05	0.00072992	glycosyl hydrolase, putative, expressed
LOC_Os03g55590	Chr3:31643336-31646161	23.575	66.5553	1.4973	4.61986	5e-05	0.00072992	MYB family transcription factor, putative, expressed
LOC_Os11g42510	Chr11:25596436-25603489	11.7707	33.1752	1.4949	3.93416	5e-05	0.00072992	tyrosine aminotransferase, putative, expressed
LOC_Os10g31680	Chr10:16607803-16608520	39.902	112.419	1.49435	3.77658	5e-05	0.00072992	glycine-rich cell wall structural protein 2 precursor, putative, expressed
LOC_Os03g56869	Chr3:32394937-32397257	0.807815	2.26574	1.48788	1.6898	0.009	0.0496501	ribose-5-phosphate isomerase A, putative, expressed
LOC_Os02g56340	Chr2:34488376-34489365	1.68876	4.73629	1.48779	1.79573	0.00815	0.0461917	expressed protein
LOC_Os06g46930	Chr6:28472586-28474784	5.99368	16.8054	1.48741	2.84092	5e-05	0.00072992	ribosomal protein L24, putative, expressed
LOC_Os01g03130	Chr1:1217005-1218122	3.86845	10.8351	1.48589	2.48918	0.00015	0.00189973	expressed protein
LOC_Os03g02430	Chr3:861239-862777	1.6741	4.68832	1.48568	2.16017	0.00045	0.00480686	PPR repeat domain containing protein, putative, expressed
LOC_Os03g04660	Chr3:2211806-2213941	5.23427	14.6357	1.48343	3.39729	5e-05	0.00072992	cytochrome P450 86A1, putative, expressed
LOC_Os12g32970	Chr12:19910582-19911477	13.9103	38.8151	1.48046	3.64049	5e-05	0.00072992	membrane associated DUF588 domain containing protein, putative, expressed
LOC_Os07g49270	Chr7:29505006-29516375	17.3991	48.5084	1.47922	2.73473	5e-05	0.00072992	AMP deaminase, putative, expressed
LOC_Os04g40070	Chr4:23859219-23863737	1.39681	3.89277	1.47866	2.72258	5e-05	0.00072992	GRAM and C2 domains containing protein, putative, expressed
LOC_Os02g11040	Chr2:5912590-5914192	13.9227	38.798	1.47854	4.40586	5e-05	0.00072992	expressed protein
LOC_Os02g33560	Chr2:19962596-19967923	7.62994	21.2319	1.47649	3.63749	5e-05	0.00072992	expressed protein
LOC_Os03g51010	Chr3:29150119-29153687	5.33363	14.8342	1.47574	3.3336	5e-05	0.00072992	hydrolase, alpha/beta fold family domain containing protein, expressed
LOC_Os09g09320	Chr9:4988971-4991687	9.5594	26.574	1.47502	3.26179	0.0001	0.00135054	nuclear transport factor, putative, expressed
LOC_Os01g07040	Chr1:3315001-3315609	12.6256	35.0921	1.4748	2.72176	5e-05	0.00072992	POEI41 - Pollen Ole e I allergen and extensin family protein precursor, expressed
LOC_Os03g06010	Chr3:3003412-3004575	3.43561	9.54682	1.47445	2.37412	0.00145	0.0124502	expansin precursor, putative, expressed
LOC_Os10g31640	Chr10:16581495-16582365	44.1454	122.602	1.47365	3.85414	5e-05	0.00072992	glycine-rich cell wall structural protein 2 precursor, putative, expressed
LOC_Os11g37260	Chr11:22003367-22010520	5.53072	15.3553	1.4732	3.87954	5e-05	0.00072992	SEY1, putative, expressed
LOC_Os12g12740	Chr12:7017320-7022666	5.86878	16.2861	1.47251	3.78801	5e-05	0.00072992	leucine-rich repeat family protein, putative, expressed
LOC_Os11g35240	Chr11:20660237-20661856	1.13261	3.14166	1.47187	1.69138	0.00805	0.0457448	transposon protein, putative, unclassified, expressed
LOC_Os01g63620	Chr1:36894553-36897429	6.14254	17.0113	1.46958	4.03141	5e-05	0.00072992	expressed protein
LOC_Os08g10500	Chr8:6168468-6169041	207.745	574.489	1.46747	2.58914	5e-05	0.00072992	expressed protein
LOC_Os01g17170	Chr1:9874325-9876951	11.7917	32.5887	1.4666	3.63924	5e-05	0.00072992	magnesium-protoporphyrin IX monomethyl ester cyclase,chloroplast precursor, putative, expressed
LOC_Os07g29330	Chr7:17198414-17209485	3.70081	10.2269	1.46646	2.41593	0.00015	0.00189973	serine/threonine-protein kinase CTR1, putative, expressed
LOC_Os10g39890	Chr10:21338217-21339608	15.5779	43.0217	1.46557	3.35892	5e-05	0.00072992	POEI31 - Pollen Ole e I allergen and extensin family protein precursor, putative, expressed
LOC_Os02g15660	Chr2:8809966-8813976	2.90884	8.02053	1.46325	3.55559	5e-05	0.00072992	tetratricopeptide repeat, putative, expressed
LOC_Os03g28090	Chr3:16151223-16153558	0.930507	2.56209	1.46123	2.49689	0.002	0.0160445	pectinesterase, putative, expressed
LOC_Os03g03450	Chr3:1484201-1490669	23.7265	65.2315	1.45907	3.20001	5e-05	0.00072992	anthranilate phosphoribosyltransferase, chloroplast precursor, putative, expressed
LOC_Os05g35430	Chr5:21048354-21049166	2.84594	7.82132	1.45851	2.11116	0.00125	0.0110436	expressed protein
LOC_Os09g28210	Chr9:17132210-17133476	5.16701	14.1946	1.45794	2.94594	0.0001	0.00135054	bHelix-loop-helix transcription factor, putative, expressed
LOC_Os10g31320	Chr10:16426001-16426931	7.85375	21.5747	1.45789	2.41528	0.0004	0.0043648	retrotransposon protein, putative, unclassified, expressed
LOC_Os09g10760	Chr9:5870960-5873202	9.30963	25.5712	1.45772	3.30518	5e-05	0.00072992	RNA recognition motif containing protein, putative, expressed
LOC_Os10g35370	Chr10:18900289-18904022	4.74548	13.0303	1.45725	2.99685	5e-05	0.00072992	oxidoreductase, short chain dehydrogenase/reductase family domain containing family, expressed
LOC_Os09g31514	Chr9:19020419-19024392	10.537	28.926	1.45691	3.05196	5e-05	0.00072992	dihydroflavonol-4-reductase, putative, expressed
LOC_Os03g15960	Chr3:8805566-8806601	26.4884	72.6073	1.45476	4.14982	5e-05	0.00072992	hsp20/alpha crystallin family protein, putative, expressed
LOC_Os02g17880	Chr2:10359559-10361069	6.92344	18.9772	1.45471	2.82349	5e-05	0.00072992	glycosyl hydrolases family 16, putative, expressed
LOC_Os03g03990	Chr3:1817495-1818855	1.55152	4.25167	1.45434	2.2476	0.0027	0.0201843	signal recognition particle 43 kDa protein, chloroplast precursor, putative, expressed
LOC_Os02g37309	Chr2:22556911-22558163	3.75825	10.2916	1.45334	2.4456	0.00015	0.00189973	expressed protein
LOC_Os12g07840	Chr12:3966719-3971412	0.477779	1.3068	1.45162	2.35358	0.0019	0.0154399	dehydration response related protein, putative, expressed
LOC_Os08g43440	Chr8:27479060-27481168	6.65808	18.2069	1.45131	3.81837	5e-05	0.00072992	cytochrome P450, putative, expressed
LOC_Os08g32980	Chr8:20461749-20465194	119.001	324.685	1.44807	4.2877	5e-05	0.00072992	expressed protein
LOC_Os05g34550	Chr5:20484911-20490183	0.691005	1.88486	1.44769	1.81029	0.0034	0.0241943	MLO domain containing protein, putative, expressed
LOC_Os02g45270	Chr2:27502722-27503874	1.01193	2.76018	1.44766	1.71746	0.0087	0.0484668	expressed protein
LOC_Os05g33130	Chr5:19426415-19427875	432.554	1178.71	1.44625	3.87399	5e-05	0.00072992	CHIT17 - Chitinase family protein precursor, expressed
LOC_Os03g11020	Chr3:5669922-5672004	0.719519	1.95904	1.44505	1.80243	0.0037	0.0257669	PPR repeat containing protein, expressed
LOC_Os01g52240	Chr1:30030996-30041476	106.78	290.53	1.44404	2.60823	0.0004	0.0043648	chlorophyll A-B binding protein, putative, expressed
LOC_Os11g32880	Chr11:19421480-19429665	3.07596	8.36573	1.44345	3.38585	5e-05	0.00072992	DEAD-box ATP-dependent RNA helicase, putative, expressed
LOC_Os01g33460	Chr1:18425444-18430767	0.231172	0.628325	1.44254	1.74181	0.00395	0.0271349	retrotransposon protein, putative, unclassified, expressed
LOC_Os04g58200	Chr4:34663054-34664723	3.16632	8.60603	1.44254	2.25611	0.0001	0.00135054	protochlorophyllide reductase A, chloroplast precursor, putative, expressed
LOC_Os03g47050	Chr3:26617085-26618334	8.1803	22.2151	1.44132	3.09487	5e-05	0.00072992	expressed protein
LOC_Os02g43010	Chr2:25890440-25895244	14.7735	40.0675	1.43942	4.09891	5e-05	0.00072992	vacuolar-processing enzyme precursor, putative, expressed
LOC_Os01g57968	Chr1:33531938-33533704	11.3119	30.6502	1.43805	3.80346	5e-05	0.00072992	expressed protein
LOC_Os01g37130	Chr1:20738582-20742431	4.95909	13.428	1.43709	3.03286	5e-05	0.00072992	protein phosphatase 2C, putative, expressed
LOC_Os07g30090	Chr7:17740981-17742315	2.07575	5.61809	1.43644	1.91229	0.00195	0.0157495	actin-depolymerizing factor, putative, expressed
LOC_Os03g42230	Chr3:23491994-23496324	1.45592	3.93669	1.43505	2.61306	5e-05	0.00072992	B3 DNA binding domain containing protein, expressed
LOC_Os06g09570	Chr6:4870859-4874711	38.9296	105.047	1.43209	4.21143	5e-05	0.00072992	nucleolar GTP-binding protein 1, putative, expressed
LOC_Os08g24390	Chr8:14724916-14732071	1.72184	4.637	1.42924	2.43852	0.0001	0.00135054	expressed protein
LOC_Os07g46860	Chr7:28013819-28014683	2.82289	7.58203	1.42541	2.10614	0.0051	0.032634	sex determination protein tasselseed-2, putative, expressed
LOC_Os03g25790	Chr3:14759851-14767857	21.3062	57.201	1.42477	4.63091	5e-05	0.00072992	glycosyl hydrolases family 17 protein, expressed
LOC_Os01g44250	Chr1:25368480-25371011	5.80502	15.5754	1.4239	2.99407	5e-05	0.00072992	CBS domain containing membrane protein, putative, expressed
LOC_Os03g16900	Chr3:9392252-9395747	1.88929	5.06805	1.42359	2.30177	0.0003	0.00344573	rab GDP dissociation inhibitor alpha, putative, expressed
LOC_Os02g54900	Chr2:33623755-33633614	1.59459	4.27613	1.42312	1.78216	0.00785	0.0449732	STE_PAK_Ste20_STLK.2 - STE kinases include homologs to sterile 7, sterile 11 and sterile 20 from yeast, expressed
LOC_Os01g73540	Chr1:42613762-42614641	2.01098	5.38515	1.42109	1.5804	0.00855	0.0478101	YGGT family protein, putative, expressed
LOC_Os03g63950	Chr3:36132037-36134636	6.24171	16.6945	1.41936	3.43078	5e-05	0.00072992	plastid-specific 30S ribosomal protein 1, chloroplast precursor, putative, expressed
LOC_Os01g63270	Chr1:36670220-36676478	9.15123	24.4684	1.41888	4.04392	5e-05	0.00072992	alpha-glucan phosphorylast isozyme, putative, expressed
LOC_Os06g08500	Chr6:4192206-4194416	2.7718	7.41001	1.41865	2.19758	0.00075	0.00738829	BHLH transcription factor, putative, expressed
LOC_Os06g51084	Chr6:30897375-30905815	35.6264	95.2247	1.41839	4.16436	5e-05	0.00072992	1,4-alpha-glucan-branching enzyme, chloroplast precursor, putative, expressed
LOC_Os05g37450	Chr5:21914658-21917380	1.94844	5.2077	1.41833	2.51132	0.0001	0.00135054	starch binding domain containing protein, putative, expressed
LOC_Os06g23684	Chr6:13835592-13844081	13.1455	35.1231	1.41786	3.80409	5e-05	0.00072992	tyrosine aminotransferase, putative, expressed
LOC_Os09g08570	Chr9:4467901-4468804	2.67185	7.1371	1.4175	2.23165	0.004	0.0273914	expressed protein
LOC_Os02g30630	Chr2:18236024-18238376	57.9905	154.891	1.41736	4.22295	5e-05	0.00072992	thiamine pyrophosphate enzyme, C-terminal TPP binding domain containing protein, expressed
LOC_Os11g02240	Chr11:630579-633695	8.98793	24.0001	1.41698	3.82511	5e-05	0.00072992	CAMK_KIN1/SNF1/Nim1_like.4 - CAMK includes calcium/calmodulin depedent protein kinases, expressed
LOC_Os05g02060	Chr5:600301-603321	16.3469	43.6472	1.41687	3.31809	5e-05	0.00072992	mitochondrial import inner membrane translocase subunit Tim17, putative, expressed
LOC_Os03g13050	Chr3:7061768-7063319	16.5886	44.2235	1.41462	4.27346	5e-05	0.00072992	E2F-related protein, putative, expressed
LOC_Os02g36140	Chr2:21765008-21773418	7.34876	19.5279	1.40996	3.6447	5e-05	0.00072992	terpene synthase, putative, expressed
LOC_Os02g49820	Chr2:30444895-30449508	1.63184	4.33603	1.40988	2.22072	0.0006	0.00612607	RNA recognition motif family protein, expressed
LOC_Os06g18140	Chr6:10553308-10555191	6.19609	16.4239	1.40637	3.61155	5e-05	0.00072992	UDP-glucoronosyl and UDP-glucosyl transferase domain containing protein, expressed
LOC_Os03g02590	Chr3:955870-960249	7.52375	19.9302	1.40543	3.29187	5e-05	0.00072992	peroxisomal biogenesis factor 11, putative, expressed
LOC_Os01g24764	Chr1:13934494-13935854	3.73236	9.88567	1.40525	2.5225	0.0001	0.00135054	expressed protein
LOC_Os10g38110	Chr10:20411943-20416491	2.19398	5.80991	1.40497	2.65761	0.0001	0.00135054	cytochrome P450, putative, expressed
LOC_Os02g46560	Chr2:28390169-28393248	2.91115	7.70137	1.40352	2.765	0.0001	0.00135054	helix-loop-helix DNA-binding protein, putative, expressed
LOC_Os02g52620	Chr2:32189250-32190146	9.113	24.0636	1.40085	2.99987	5e-05	0.00072992	expressed protein
LOC_Os11g02840	Chr11:959795-961058	3.35263	8.84794	1.40005	1.7851	0.00495	0.0319316	protein kinase, putative, expressed
LOC_Os10g31780	Chr10:16663931-16664717	165.389	435.932	1.39824	5.08284	5e-05	0.00072992	oxidoreductase, short chain dehydrogenase/reductase family domain containing protein, expressed
LOC_Os07g35050	Chr7:20999328-21001308	0.956988	2.52055	1.39716	1.82065	0.0057	0.0354445	OsFBX237 - F-box domain containing protein, expressed
LOC_Os03g17580	Chr3:9781433-9782590	9.72577	25.5993	1.39622	3.16159	5e-05	0.00072992	ribosomal protein L10, putative, expressed
LOC_Os05g49060	Chr5:28128413-28131204	4.9142	12.9203	1.39461	2.65387	5e-05	0.00072992	uncharacterized protein ycf23, putative, expressed
LOC_Os09g38090	Chr9:21945941-21949026	2.23461	5.87462	1.39447	2.99309	5e-05	0.00072992	expressed protein
LOC_Os02g04460	Chr2:1972934-1974663	10.9766	28.849	1.39409	3.25164	5e-05	0.00072992	ribosomal protein L3, putative, expressed
LOC_Os05g36930	Chr5:21567281-21571812	1.04865	2.7547	1.39335	1.98272	0.0033	0.023631	histone deacetylase, putative, expressed
LOC_Os03g19380	Chr3:10910539-10911544	18.075	47.3783	1.39023	3.33762	5e-05	0.00072992	calvin cycle protein CP12, putative, expressed
LOC_Os08g31630	Chr8:19578769-19583372	7.93762	20.8052	1.39017	3.74	5e-05	0.00072992	uncharacterized glycosyl hydrolase Rv2006/MT2062, putative, expressed
LOC_Os01g47330	Chr1:27041790-27042669	10.8063	28.3116	1.38952	3.08091	5e-05	0.00072992	ribosomal protein L7/L12 C-terminal domain containing protein, expressed
LOC_Os05g31730	Chr5:18475522-18479480	30.5339	79.8253	1.38643	4.7392	5e-05	0.00072992	transporter, monovalent cation:proton antiporter-2 family, putative, expressed
LOC_Os03g06400	Chr3:3197654-3199982	1.51181	3.95179	1.38623	2.35887	0.0004	0.0043648	expressed protein
LOC_Os07g46280	Chr7:27615396-27618751	4.8917	12.7757	1.385	3.27145	5e-05	0.00072992	Os7bglu26 - beta-mannosidase/glucosidase/exoglucanase, expressed
LOC_Os07g26460	Chr7:15221077-15223063	2.90219	7.57631	1.38435	1.85989	0.0027	0.0201843	GLTP domain containing protein, putative, expressed
LOC_Os08g36140	Chr8:22772965-22775158	3.45474	9.01098	1.38311	2.14777	0.00045	0.00480686	expressed protein
LOC_Os06g13940	Chr6:7763142-7763949	15.0138	39.1232	1.38173	2.95155	5e-05	0.00072992	expressed protein
LOC_Os10g11370	Chr10:6304121-6307275	3.70933	9.65296	1.37981	2.36667	0.00065	0.00656619	LTPL87 - Protease inhibitor/seed storage/LTP family protein precursor, putative, expressed
LOC_Os05g08860	Chr5:4895040-4895877	4.66238	12.1253	1.37889	2.35725	0.0014	0.0120995	expressed protein
LOC_Os05g46340	Chr5:26858363-26860249	11.0236	28.6622	1.37856	4.01264	5e-05	0.00072992	expressed protein
LOC_Os01g39960	Chr1:22534998-22538743	2.27951	5.92592	1.37831	2.33383	5e-05	0.00072992	lycopene epsilon cyclase, chloroplast precursor, putative, expressed
LOC_Os01g65260	Chr1:37866112-37868060	2.29225	5.9568	1.37777	2.69277	0.0002	0.00243581	amidophosphoribosyltransferase, chloroplast precursor, putative, expressed
LOC_Os01g55420	Chr1:31925865-31927051	2.67872	6.96092	1.37773	2.29239	0.0016	0.013514	expressed protein
LOC_Os04g55840	Chr4:33245193-33251356	1.14955	2.98663	1.37745	2.1534	0.00065	0.00656619	expressed protein
LOC_Os02g26390	Chr2:15495888-15499054	1.29832	3.36387	1.37348	2.58367	0.0001	0.00135054	expressed protein
LOC_Os02g17500	Chr2:10074580-10081512	50.0707	129.681	1.37293	4.03784	5e-05	0.00072992	transporter family protein, putative, expressed
LOC_Os07g04560	Chr7:2023157-2025061	15.9831	41.3861	1.3726	3.74507	5e-05	0.00072992	no apical meristem protein, putative, expressed
LOC_Os09g09650	Chr9:5197974-5201335	4.51362	11.686	1.37242	2.82595	5e-05	0.00072992	retrotransposon protein, putative, Ty3-gypsy subclass, expressed
LOC_Os04g49460	Chr4:29507626-29508822	4.11878	10.6482	1.37032	2.6104	0.00015	0.00189973	protein kinase domain containing protein, expressed
LOC_Os09g29960	Chr9:18234923-18235879	4.70838	12.1701	1.37003	2.69485	0.0003	0.00344573	dof zinc finger domain containing protein, putative, expressed
LOC_Os01g17150	Chr1:9859349-9860764	8.39927	21.6946	1.369	2.4932	0.00015	0.00189973	plastid-specific 50S ribosomal protein 5, chloroplast precursor, putative, expressed
LOC_Os06g48240	Chr6:29180249-29181960	3.82214	9.87107	1.36882	2.65778	5e-05	0.00072992	AAA ATPase, putative, expressed
LOC_Os01g59560	Chr1:34437261-34444377	0.600566	1.55058	1.36841	1.88308	0.00295	0.0216122	protein kinase domain containing protein, expressed
LOC_Os09g31446	Chr9:18944401-18946190	0.954511	2.4633	1.36776	1.79113	0.0068	0.0404568	expressed protein
LOC_Os12g23200	Chr12:13115138-13117356	22.7473	58.6444	1.3663	3.26706	5e-05	0.00072992	photosystem I reaction center subunit XI, chloroplast precursor, putative, expressed
LOC_Os07g36610	Chr7:21901504-21908493	1.70712	4.40076	1.36618	2.74605	0.0001	0.00135054	CSLF9 - cellulose synthase-like family F; beta1,3;1,4 glucan synthase, expressed
LOC_Os04g46010	Chr4:27256244-27258942	2.38467	6.14703	1.3661	2.59697	5e-05	0.00072992	PPR repeat domain containing protein, putative, expressed
LOC_Os03g37240	Chr3:20638708-20641638	0.872467	2.24711	1.3649	2.01442	0.00165	0.013809	retrotransposon protein, putative, unclassified, expressed
LOC_Os03g57260	Chr3:32656082-32660637	1.22774	3.15877	1.36335	1.83853	0.00275	0.0204362	GRF zinc finger family protein, expressed
LOC_Os02g13870	Chr2:7515988-7519336	13.3245	34.2674	1.36276	3.49623	5e-05	0.00072992	aquaporin protein, putative, expressed
LOC_Os09g31230	Chr9:18782719-18788014	1.28987	3.31723	1.36275	2.47782	5e-05	0.00072992	expressed protein
LOC_Os04g56400	Chr4:33624331-33631095	6.36123	16.3321	1.36034	3.31612	5e-05	0.00072992	glutamine synthetase, catalytic domain containing protein, expressed
LOC_Os02g15930	Chr2:9021453-9023139	1.19865	3.07591	1.3596	2.01963	0.0028	0.0207301	expressed protein
LOC_Os05g49610	Chr5:28464099-28466023	4.00709	10.2711	1.35796	2.93503	5e-05	0.00072992	ubiquitin carboxyl-terminal hydrolase, family 1, putative, expressed
LOC_Os08g13795	Chr8:8224154-8224982	2.68646	6.87451	1.35555	1.8999	0.00685	0.0406324	expressed protein
LOC_Os04g43390	Chr4:25658226-25666730	18.8331	48.1396	1.35396	3.60193	5e-05	0.00072992	Os4bglu16 - monolignol beta-glucoside homologue, expressed
LOC_Os11g05556	Chr11:2517480-2521945	4.53017	11.5778	1.35373	3.2156	5e-05	0.00072992	signal recognition particle 54 kDa protein, putative, expressed
LOC_Os03g59640	Chr3:33955197-33961962	3.91058	9.98867	1.35291	3.19326	5e-05	0.00072992	magnesium-chelatase subunit chlD, chloroplast precursor, putative, expressed
LOC_Os04g48390	Chr4:28862599-28869130	8.66592	22.1155	1.35163	3.6101	5e-05	0.00072992	uncharacterized membrane protein, putative, expressed
LOC_Os01g37630	Chr1:21056630-21058040	54.8213	139.88	1.35138	4.36741	5e-05	0.00072992	esterase, putative, expressed
LOC_Os01g49360	Chr1:28376397-28379686	6.14988	15.685	1.35075	3.56303	5e-05	0.00072992	FAD-binding and arabino-lactone oxidase domains containing protein, putative, expressed
LOC_Os03g55400	Chr3:31517357-31518883	2.90561	7.40775	1.35019	2.18922	0.0006	0.00612607	expressed protein
LOC_Os07g11110	Chr7:6134014-6136780	1.54385	3.93493	1.3498	1.92643	0.0013	0.0113923	NAD dependent epimerase/dehydratase family protein, putative, expressed
LOC_Os04g47400	Chr4:28126889-28130289	1.54339	3.93351	1.34971	2.24846	0.0005	0.0052468	monocopper oxidase, putative, expressed
LOC_Os07g06080	Chr7:2945226-2949178	12.421	31.6548	1.34964	3.1243	5e-05	0.00072992	FAD dependent oxidoreductase domain containing protein, expressed
LOC_Os02g47840	Chr2:29259328-29265497	21.9667	55.9504	1.34883	3.24045	5e-05	0.00072992	universal stress protein domain containing protein, putative, expressed
LOC_Os02g09590	Chr2:4936409-4937806	14.4298	36.7492	1.34866	3.11342	5e-05	0.00072992	ribosome, putative, expressed
LOC_Os02g44920	Chr2:27215240-27217719	1.15191	2.93	1.34688	1.9072	0.00715	0.0420038	protein kinase domain containing protein, expressed
LOC_Os12g37610	Chr12:23096993-23099367	5.50875	14.0071	1.34637	2.77495	5e-05	0.00072992	ribosomal protein S6, putative, expressed
LOC_Os01g59000	Chr1:34099443-34101175	2.84803	7.23401	1.34483	2.56113	5e-05	0.00072992	cytochrome P450, putative, expressed
LOC_Os06g41360	Chr6:24789411-24793565	22.4121	56.7768	1.34102	3.84865	5e-05	0.00072992	phosphoribosyl transferase, putative, expressed
LOC_Os06g04480	Chr6:1922428-1923594	14.287	36.1924	1.34098	3.05687	5e-05	0.00072992	expressed protein
LOC_Os06g09900	Chr6:5044930-5046247	36.5952	92.6502	1.34014	4.40499	5e-05	0.00072992	expressed protein
LOC_Os02g40240	Chr2:24350427-24354694	1.26065	3.18922	1.33903	2.70563	5e-05	0.00072992	receptor kinase, putative, expressed
LOC_Os12g38590	Chr12:23703441-23712907	2.51401	6.35336	1.33753	3.28677	5e-05	0.00072992	pumilio-family RNA binding repeat containing protein, expressed
LOC_Os02g50372	Chr2:30763129-30764865	0.808421	2.04242	1.3371	1.66473	0.0067	0.0400118	expressed protein
LOC_Os10g41100	Chr10:22069628-22072449	1.43622	3.62482	1.33563	1.98323	0.00395	0.0271349	CCT motif family protein, expressed
LOC_Os01g52530	Chr1:30180580-30184477	9.75677	24.5907	1.33364	3.30961	5e-05	0.00072992	phosphoribosyl transferase, putative, expressed
LOC_Os01g64730	Chr1:37556673-37560104	38.842	97.8563	1.33305	3.95616	5e-05	0.00072992	bZIP transcription factor domain containing protein, expressed
LOC_Os01g46760	Chr1:26652943-26658313	5.89016	14.8328	1.33241	3.16556	5e-05	0.00072992	protein phosphatase 2C, putative, expressed
LOC_Os01g40310	Chr1:22754487-22755471	7.62927	19.212	1.33239	2.57392	5e-05	0.00072992	expressed protein
LOC_Os01g43320	Chr1:24753698-24758859	6.00488	15.1144	1.33171	2.98238	5e-05	0.00072992	transmembrane amino acid transporter protein, putative, expressed
LOC_Os01g43070	Chr1:24572981-24576859	5.64825	14.2162	1.33166	3.06872	5e-05	0.00072992	psbP-related thylakoid lumenal protein 4, chloroplast precursor, putative, expressed
LOC_Os02g53660	Chr2:32822597-32823749	2.45537	6.17606	1.33075	2.34672	0.00405	0.0276305	expressed protein
LOC_Os01g50930	Chr1:29240063-29246877	8.27166	20.7941	1.32993	2.99079	5e-05	0.00072992	expressed protein
LOC_Os03g02420	Chr3:857753-859760	81.0818	203.801	1.32971	4.00789	5e-05	0.00072992	KH domain containing protein, putative, expressed
LOC_Os09g26920	Chr9:16356706-16360010	6.32277	15.8912	1.32959	3.90487	5e-05	0.00072992	OsSub57 - Putative Subtilisin homologue, expressed
LOC_Os12g13910	Chr12:7892374-7893944	6.78224	17.0429	1.32934	3.02713	5e-05	0.00072992	expressed protein
LOC_Os06g48200	Chr6:29156424-29157883	4.88199	12.2579	1.32817	2.8242	0.0001	0.00135054	glycosyl hydrolases family 16, putative, expressed
LOC_Os01g60600	Chr1:35032510-35035321	1.28623	3.22655	1.32684	1.9608	0.00315	0.0227968	WRKY108, expressed
LOC_Os01g06990	Chr1:3297849-3298410	13.8204	34.5795	1.32312	2.40384	0.0002	0.00243581	POEI36 - Pollen Ole e I allergen and extensin family protein precursor, putative, expressed
LOC_Os05g30500	Chr5:17670773-17671582	3.70602	9.26317	1.32164	2.31919	0.0007	0.00697948	expressed protein
LOC_Os11g43990	Chr11:26577114-26582185	0.655056	1.6361	1.32057	1.56795	0.00625	0.0379914	expressed protein
LOC_Os01g12820	Chr1:7095373-7097654	0.857941	2.1416	1.31974	1.71187	0.0074	0.0430582	harpin-induced protein, putative, expressed
LOC_Os01g21144	Chr1:11800238-11803815	1.61315	4.02288	1.31835	2.33091	0.00015	0.00189973	expressed protein
LOC_Os07g31610	Chr7:18765672-18767140	14.2726	35.5567	1.31687	3.96208	5e-05	0.00072992	peroxidase precursor, putative, expressed
LOC_Os02g48370	Chr2:29611155-29616291	0.711106	1.77136	1.31672	1.77096	0.00505	0.0323837	ARID/BRIGHT DNA-binding domain-containing protein, putative, expressed
LOC_Os01g64910	Chr1:37682287-37684066	2.95023	7.34122	1.31519	2.84336	0.00035	0.00391428	anthocyanidin 5,3-O-glucosyltransferase, putative, expressed
LOC_Os12g36750	Chr12:22511488-22514907	8.32869	20.6959	1.31318	3.38366	5e-05	0.00072992	expressed protein
LOC_Os01g43270	Chr1:24712169-24713612	2.70857	6.72753	1.31255	2.16992	0.0012	0.0107172	hydroquinone glucosyltransferase, putative, expressed
LOC_Os07g34589	Chr7:20733145-20735347	962.31	2387.59	1.31098	2.96386	5e-05	0.00072992	translation initiation factor SUI1, putative, expressed
LOC_Os11g13970	Chr11:7745979-7747416	2.15916	5.34867	1.30871	2.06946	0.00255	0.0193238	transferase family protein, putative, expressed
LOC_Os01g64960	Chr1:37696777-37699752	24.7154	61.1856	1.30778	3.17506	5e-05	0.00072992	chlorophyll A-B binding protein, putative, expressed
LOC_Os03g48310	Chr3:27510163-27517321	6.49977	16.0651	1.30547	3.55021	5e-05	0.00072992	plasma membrane ATPase, putative, expressed
LOC_Os01g69950	Chr1:40453828-40456679	7.62437	18.7731	1.29998	3.2708	5e-05	0.00072992	ribosomal protein L27, putative, expressed
LOC_Os03g55050	Chr3:31302707-31305227	4.48248	11.0353	1.29976	3.02386	5e-05	0.00072992	UDP-glucoronosyl and UDP-glucosyl transferase domain containing protein, expressed
LOC_Os08g24750	Chr8:14976006-14978065	8.93798	22.0021	1.29962	3.82872	5e-05	0.00072992	xyloglucan fucosyltransferase, putative, expressed
LOC_Os06g04780	Chr6:2084591-2087400	16.2031	39.8843	1.29955	3.6771	5e-05	0.00072992	coiled-coil domain-containing protein 97, putative, expressed
LOC_Os08g36440	Chr8:22996543-22997904	3.98181	9.79617	1.29879	2.03542	0.00135	0.0117355	HVA22, putative, expressed
LOC_Os09g27750	Chr9:16886018-16887617	32.4436	79.7867	1.29822	4.02737	5e-05	0.00072992	1-aminocyclopropane-1-carboxylate oxidase 1, putative, expressed
LOC_Os11g04910	Chr11:2091023-2093124	3.87292	9.52121	1.29772	2.01807	0.0014	0.0120995	ankyrin repeat domain containing protein, expressed
LOC_Os11g25780	Chr11:14705214-14714572	12.7383	31.3085	1.29738	3.28659	5e-05	0.00072992	PB1 domain containing protein, expressed
LOC_Os08g41780	Chr8:26379417-26384641	9.51282	23.365	1.2964	3.21182	5e-05	0.00072992	triacylglycerol lipase precursor, putative, expressed
LOC_Os02g14460	Chr2:7959781-7960984	20.2093	49.6287	1.29616	3.43711	5e-05	0.00072992	peroxidase precursor, putative, expressed
LOC_Os05g11260	Chr5:6358098-6362407	0.58405	1.43264	1.29451	1.88139	0.0046	0.0302558	expressed protein
LOC_Os06g07040	Chr6:3342422-3346318	42.542	104.35	1.29447	3.71746	5e-05	0.00072992	OsIAA20 - Auxin-responsive Aux/IAA gene family member, expressed
LOC_Os01g32730	Chr1:17947746-17951664	2.43615	5.97502	1.29434	2.18322	0.00055	0.00566905	tetratricopeptide repeat containing protein, putative, expressed
LOC_Os09g35800	Chr9:20600603-20603003	13.8575	33.9581	1.29309	3.59625	5e-05	0.00072992	UDP-glucose 4-epimerase, putative, expressed
LOC_Os05g40400	Chr5:23739163-23739799	9.98173	24.4527	1.29263	2.37923	0.00095	0.00888084	harpin-induced protein 1 domain containing protein, expressed
LOC_Os02g41510	Chr2:24878774-24879934	2.65494	6.50171	1.29214	2.00233	0.00105	0.0096341	MYB family transcription factor, putative, expressed
LOC_Os11g47530	Chr11:28733116-28734280	3.97254	9.7141	1.29002	2.31504	0.00025	0.00295117	glycosyl hydrolase, putative, expressed
LOC_Os07g35860	Chr7:21465219-21466378	18.6969	45.7021	1.28946	3.67415	5e-05	0.00072992	plastocyanin-like domain containing protein, putative, expressed
LOC_Os10g30870	Chr10:16092772-16098550	12.785	31.2362	1.28877	3.21097	5e-05	0.00072992	expressed protein
LOC_Os03g38800	Chr3:21544800-21546790	3.29243	8.04324	1.28863	2.44686	0.0001	0.00135054	AAA family ATPase, putative, expressed
LOC_Os12g27440	Chr12:16144946-16146126	2.21276	5.4031	1.28794	2.0153	0.00115	0.0103875	expressed protein
LOC_Os08g03880	Chr8:1848412-1853016	0.759223	1.85238	1.28679	2.25946	0.00055	0.00566905	retrotransposon protein, putative, unclassified, expressed
LOC_Os11g13850	Chr11:7639435-7642984	2.82287	6.87344	1.28387	2.05954	0.00075	0.00738829	rieske domain containing protein, expressed
LOC_Os01g59530	Chr1:34420989-34423678	7.88437	19.1793	1.28248	2.71447	5e-05	0.00072992	OsCML1 - Calmodulin-related calcium sensor protein, expressed
LOC_Os08g36860	Chr8:23288612-23294164	16.4686	40.0436	1.28186	3.91595	5e-05	0.00072992	cytochrome P450, putative, expressed
LOC_Os09g21460	Chr9:12975275-12977293	4.19983	10.2109	1.2817	1.94043	0.0034	0.0241943	expressed protein
LOC_Os12g38660	Chr12:23744663-23760159	180.869	438.477	1.27755	2.53617	5e-05	0.00072992	expressed protein
LOC_Os05g38210	Chr5:22404289-22406227	5.18914	12.5691	1.27632	2.43041	0.00015	0.00189973	mitochondrial glycoprotein, putative, expressed
LOC_Os05g03750	Chr5:1652019-1654379	2.50704	6.05473	1.27208	2.09054	0.00075	0.00738829	expressed protein
LOC_Os01g68480	Chr1:39794225-39799341	7.14384	17.2503	1.27185	2.52944	5e-05	0.00072992	thioredoxin, putative, expressed
LOC_Os02g39930	Chr2:24152111-24153073	33.29	80.3527	1.27126	3.18081	5e-05	0.00072992	OsTIL-1 Temperature-induced lipocalin-1, expressed
LOC_Os01g46380	Chr1:26392163-26396348	232.249	559.879	1.26945	3.15599	5e-05	0.00072992	ketol-acid reductoisomerase, chloroplast precursor, putative, expressed
LOC_Os03g01830	Chr3:505921-510284	8.27757	19.9515	1.26922	3.32459	5e-05	0.00072992	DEAD-box ATP-dependent RNA helicase, putative, expressed
LOC_Os03g61150	Chr3:34733452-34734781	143.988	346.725	1.26784	3.97933	5e-05	0.00072992	expressed protein
LOC_Os01g20110	Chr1:11412130-11421047	3.72999	8.97769	1.26717	2.75077	5e-05	0.00072992	expressed protein
LOC_Os07g01420	Chr7:264524-265650	8.36203	20.1128	1.26619	2.79561	0.0004	0.0043648	peroxidase precursor, putative, expressed
LOC_Os09g29404	Chr9:17851429-17868669	5.25308	12.6341	1.26609	3.23706	5e-05	0.00072992	glycogen operon protein glgX, putative, expressed
LOC_Os12g27830	Chr12:16398237-16400772	1.64374	3.95135	1.26536	1.78054	0.0032	0.0230815	dehydrogenase/reductase, putative, expressed
LOC_Os04g23440	Chr4:13399727-13401220	2.42861	5.8301	1.26339	1.68845	0.0089	0.0492583	helix-loop-helix DNA-binding domain containing protein, expressed
LOC_Os10g35140	Chr10:18751394-18754005	3.36987	8.08751	1.263	2.1664	0.0004	0.0043648	integral membrane protein, putative, expressed
LOC_Os03g03020	Chr3:1232213-1234476	6.59562	15.82	1.26217	2.49635	5e-05	0.00072992	L11 domain containing ribosomal protein, putative, expressed
LOC_Os09g34910	Chr9:20342785-20347227	92.6671	222.155	1.26144	3.53144	5e-05	0.00072992	DEAD-box ATP-dependent RNA helicase 7, putative, expressed
LOC_Os01g65620	Chr1:38098936-38099628	6.16835	14.7861	1.26128	2.03972	0.0008	0.00773994	expressed protein
LOC_Os07g36390	Chr7:21753821-21757322	0.652351	1.56274	1.26036	1.66853	0.00495	0.0319316	PPR repeat containing protein, expressed
LOC_Os11g40760	Chr11:24382954-24384066	4.86744	11.6452	1.2585	2.28125	0.0008	0.00773994	expressed protein
LOC_Os09g30200	Chr9:18381039-18384342	1.81447	4.3403	1.25825	2.10255	0.0012	0.0107172	ATP binding protein, putative, expressed
LOC_Os05g40950	Chr5:24013452-24014600	6.72063	16.0758	1.25822	2.56459	0.0002	0.00243581	pentatricopeptide repeat-containing protein, putative, expressed
LOC_Os01g36580	Chr1:20299521-20302467	1.43456	3.43058	1.25785	1.71455	0.0052	0.033158	auxin-induced protein 5NG4, putative, expressed
LOC_Os04g21340	Chr4:12047019-12048695	1.02191	2.44352	1.2577	1.67743	0.0053	0.0336694	expressed protein
LOC_Os01g28840	Chr1:16151539-16154058	4.8881	11.6868	1.25754	3.02396	5e-05	0.00072992	C4-dicarboxylate transporter/malic acid transport protein, expressed
LOC_Os06g22690	Chr6:13196295-13198641	12.1273	28.9934	1.25747	2.58484	5e-05	0.00072992	bundle sheath defective protein 2, putative, expressed
LOC_Os09g36850	Chr9:21251841-21252866	3.23497	7.7332	1.25731	2.14556	0.0017	0.0141133	expressed protein
LOC_Os06g33710	Chr6:19614271-19619689	40.7156	97.2679	1.25638	3.76311	5e-05	0.00072992	spermidine synthase, putative, expressed
LOC_Os07g41310	Chr7:24751587-24755397	1.06207	2.53469	1.25492	1.85769	0.00325	0.0233502	COBRA, putative, expressed
LOC_Os03g44620	Chr3:25127233-25131791	327.212	780.274	1.25376	2.30632	5e-05	0.00072992	chaperone protein dnaJ, putative, expressed
LOC_Os12g42020	Chr12:26055220-26057002	5.6476	13.4671	1.25373	3.36991	0.0001	0.00135054	AGC_PVPK_like_kin82y.20 - ACG kinases include homologs to PKA, PKG and PKC, expressed
LOC_Os07g08430	Chr7:4330345-4333642	62.0481	147.929	1.25345	3.72164	5e-05	0.00072992	indole-3-glycerol phosphate lyase, chloroplast precursor, putative, expressed
LOC_Os03g45710	Chr3:25800414-25801331	11.1567	26.5985	1.25343	2.65939	5e-05	0.00072992	2Fe-2S iron-sulfur cluster binding domain containing protein, expressed
LOC_Os04g58090	Chr4:34597644-34598781	16.5675	39.4747	1.25258	3.64625	5e-05	0.00072992	harpin-induced protein 1 domain containing protein, expressed
LOC_Os01g73720	Chr1:42706523-42707981	6.13621	14.6079	1.25132	2.88616	0.0001	0.00135054	RCLEA4 - Root cap and Late embryogenesis related family protein precursor, expressed
LOC_Os10g21090	Chr10:10699245-10701961	2.26342	5.38744	1.2511	2.44733	0.0001	0.00135054	ATP binding protein, putative, expressed
LOC_Os06g05470	Chr6:2472603-2473406	12.4504	29.5931	1.24907	2.49799	0.0001	0.00135054	expressed protein
LOC_Os03g22370	Chr3:12812214-12812977	16.4959	39.1878	1.2483	2.63005	5e-05	0.00072992	ultraviolet-B-repressible protein, putative, expressed
LOC_Os11g39350	Chr11:23421716-23426690	1.44017	3.42022	1.24785	2.03367	0.0011	0.010008	expressed protein
LOC_Os07g23990	Chr7:13589490-13604623	2.3258	5.52122	1.24726	3.26861	5e-05	0.00072992	tetratricopeptide repeat domain containing protein, putative, expressed
LOC_Os03g41330	Chr3:22976954-22979936	3.56789	8.4678	1.24691	2.17894	0.0022	0.0172309	DUF260 domain containing protein, putative, expressed
LOC_Os01g07030	Chr1:3312461-3313273	12.0096	28.5016	1.24685	2.57469	5e-05	0.00072992	POEI40 - Pollen Ole e I allergen and extensin family protein precursor, expressed
LOC_Os03g58080	Chr3:33065376-33070874	3.38685	8.0371	1.24673	2.56193	0.00015	0.00189973	BT1 family protein, putative, expressed
LOC_Os01g71270	Chr1:41242466-41243837	1.49912	3.55642	1.24631	1.85373	0.0038	0.0263247	eukaryotic peptide chain release factor subunit 1-1, putative, expressed
LOC_Os02g16490	Chr2:9409106-9413648	5.91509	14.024	1.24543	3.36561	5e-05	0.00072992	expressed protein
LOC_Os07g01340	Chr7:213777-219544	1.96868	4.66242	1.24385	1.98228	0.0013	0.0113923	gibberellin 2-beta-dioxygenase 7, putative, expressed
LOC_Os09g33470	Chr9:19728408-19735541	1.85832	4.39739	1.24265	1.85214	0.00375	0.0260313	mitochondrial carrier protein, putative, expressed
LOC_Os11g01439	Chr11:256826-262011	2.86556	6.77836	1.24212	2.91638	5e-05	0.00072992	chloroplast unusual positioning protein, putative, expressed
LOC_Os07g12630	Chr7:7224592-7228243	2.96589	7.00574	1.24007	2.37334	0.00015	0.00189973	transcription elongation factor protein, putative, expressed
LOC_Os12g05690	Chr12:2622154-2623105	5.4463	12.8466	1.23804	2.18306	0.00035	0.00391428	expressed protein
LOC_Os06g37140	Chr6:21936884-21943005	4.78551	11.2877	1.23801	1.94738	0.00185	0.0150851	retrotransposon protein, putative, Ty3-gypsy subclass, expressed
LOC_Os06g27910	Chr6:15840813-15842660	4.12491	9.72546	1.23741	2.51374	5e-05	0.00072992	oleosin, putative, expressed
LOC_Os01g72460	Chr1:42018058-42019514	6.43986	15.1803	1.2371	2.13885	0.00035	0.00391428	NADPH quinone oxidoreductase, putative, expressed
LOC_Os06g20320	Chr6:11676952-11682092	7.71918	18.1718	1.23518	3.13411	5e-05	0.00072992	peptidyl-prolyl cis-trans isomerase, FKBP-type, putative, expressed
LOC_Os01g72270	Chr1:41900001-41901651	3.162	7.44118	1.23469	2.42724	0.00085	0.00814427	cytochrome P450, putative, expressed
LOC_Os08g20090	Chr8:12043341-12045833	4.9043	11.5273	1.23293	1.80548	0.00265	0.0199294	expressed protein
LOC_Os11g30500	Chr11:17729024-17730347	29.8802	70.1914	1.23211	3.17956	5e-05	0.00072992	HVA22, putative, expressed
LOC_Os08g31850	Chr8:19745525-19747077	12.7354	29.9103	1.2318	3.60032	5e-05	0.00072992	expressed protein
LOC_Os07g03100	Chr7:1180229-1182971	6.72561	15.7758	1.22997	2.95165	5e-05	0.00072992	OsFBX212 - F-box domain containing protein, expressed
LOC_Os02g56320	Chr2:34475929-34483804	1.56124	3.65637	1.22772	2.31446	0.0003	0.00344573	glycogen synthase 1, putative, expressed
LOC_Os01g20206	Chr1:11505076-11506103	9.86909	23.0823	1.2258	2.35923	0.0003	0.00344573	methyltransferase, putative, expressed
LOC_Os12g18530	Chr12:10711880-10717818	0.933665	2.18105	1.22405	2.15753	0.0005	0.0052468	nucleotidyltransferase, putative, expressed
LOC_Os03g05070	Chr3:2471159-2473026	2.91584	6.80948	1.22363	2.28788	0.0004	0.0043648	exostosin family domain containing protein, expressed
LOC_Os06g45710	Chr6:27676317-27679785	39.7365	92.7127	1.2223	3.60501	5e-05	0.00072992	phosphoglycerate kinase protein, putative, expressed
LOC_Os06g39240	Chr6:23293233-23294078	13.3833	31.222	1.22212	2.82043	0.0001	0.00135054	endothelial differentiation-related factor 1, putative, expressed
LOC_Os01g07730	Chr1:3711211-3713653	17.7229	41.3367	1.22181	3.48638	5e-05	0.00072992	phosphate/phosphoenolpyruvate translocator-related protein, putative, expressed
LOC_Os02g50990	Chr2:31190741-31197697	2.78093	6.48562	1.22168	1.70926	0.0046	0.0302558	RING-H2 finger protein ATL1Q, putative, expressed
LOC_Os02g16940	Chr2:9650580-9656895	1.6002	3.72678	1.21968	1.78968	0.00125	0.0110436	OsSub13 - Putative Subtilisin homologue, expressed
LOC_Os08g40930	Chr8:25889493-25900576	3.1052	7.2283	1.21897	2.2537	0.00025	0.00295117	Alpha amylase, catalytic domain containing protein, expressed
LOC_Os12g08770	Chr12:4506722-4507879	23.4345	54.5188	1.21812	2.71564	5e-05	0.00072992	photosystem I reaction center subunit N, chloroplast precursor, putative, expressed
LOC_Os10g34930	Chr10:18640396-18641937	37.693	87.5985	1.21661	3.39842	5e-05	0.00072992	secretory protein, putative, expressed
LOC_Os03g60480	Chr3:34385893-34388174	7.03422	16.3425	1.21617	2.67055	0.00015	0.00189973	heavy metal-associated domain containing protein, expressed
LOC_Os03g17730	Chr3:9863814-9868777	9.92705	23.0597	1.21594	3.23419	5e-05	0.00072992	P-protein, putative, expressed
LOC_Os03g46470	Chr3:26283113-26292023	22.766	52.8789	1.21581	2.92413	0.0011	0.010008	metal cation transporter, putative, expressed
LOC_Os01g21250	Chr1:11863919-11864332	178.402	413.957	1.21435	2.3851	0.00015	0.00189973	late embryogenesis abundant protein, putative, expressed
LOC_Os05g28740	Chr5:16859682-16860977	106.035	246.015	1.21421	3.86563	5e-05	0.00072992	universal stress protein domain containing protein, putative, expressed
LOC_Os02g30650	Chr2:18252569-18256034	2.21	5.12738	1.21418	2.17059	0.00055	0.00566905	heavy metal-associated domain containing protein, expressed
LOC_Os12g23780	Chr12:13512081-13513451	41.6259	96.5549	1.21387	3.53681	5e-05	0.00072992	expressed protein
LOC_Os02g55120	Chr2:33758965-33762633	4.6118	10.6947	1.2135	2.58054	5e-05	0.00072992	translation initiation factor IF-3, putative, expressed
LOC_Os12g28750	Chr12:16988414-16990867	2.91469	6.75856	1.21337	2.10123	0.0079	0.0451293	TPD1, putative, expressed
LOC_Os03g52390	Chr3:30078323-30078929	458.905	1063.07	1.21196	3.51313	5e-05	0.00072992	PIII1 - Proteinase inhibitor II family protein precursor, expressed
LOC_Os02g56700	Chr2:34764168-34766643	17.0872	39.5711	1.21153	3.47368	5e-05	0.00072992	dehydrogenase, putative, expressed
LOC_Os03g45720	Chr3:25801613-25804500	35.16	81.4168	1.21139	3.26779	5e-05	0.00072992	glyoxalase family protein, putative, expressed
LOC_Os07g38290	Chr7:22996768-23001763	2.53164	5.86078	1.21102	1.72833	0.0072	0.0422038	plastocyanin-like domain containing protein, putative, expressed
LOC_Os08g39370	Chr8:24882924-24886350	14.4313	33.3891	1.21018	3.36823	5e-05	0.00072992	citrate transporter, putative, expressed
LOC_Os01g47270	Chr1:27014071-27014866	7.67289	17.7469	1.20972	2.66353	0.00055	0.00566905	DUF1645 domain containing protein, putative, expressed
LOC_Os09g29160	Chr9:17731554-17733252	3.1286	7.23355	1.20919	2.48153	0.0012	0.0107172	expressed protein
LOC_Os03g25130	Chr3:14357770-14359171	4.49663	10.3902	1.2083	2.0677	0.00095	0.00888084	OB-fold nucleic acid binding domain containing protein, putative, expressed
LOC_Os04g44100	Chr4:26111636-26113913	5.00752	11.5698	1.2082	2.38108	0.00035	0.00391428	expressed protein
LOC_Os10g36680	Chr10:19616303-19618622	3.50521	8.09613	1.20773	2.50598	5e-05	0.00072992	ubiquitin carboxyl-terminal hydrolase, family 1, putative, expressed
LOC_Os07g09050	Chr7:4729465-4733531	1.66619	3.84382	1.20599	2.10448	0.0008	0.00773994	exostosin family protein, putative, expressed
LOC_Os05g11970	Chr5:6838792-6842750	1.69965	3.92028	1.20571	1.58993	0.0059	0.0363747	GDSL-like lipase/acylhydrolase, putative, expressed
LOC_Os04g57860	Chr4:34450560-34454341	7.42015	17.109	1.20524	3.58411	5e-05	0.00072992	endoglucanase precursor, putative, expressed
LOC_Os09g21180	Chr9:12780658-12783649	35.0517	80.81	1.20505	4.23818	5e-05	0.00072992	homeobox associated leucine zipper, putative, expressed
LOC_Os03g41460	Chr3:23068744-23071303	2.85983	6.5817	1.20253	2.29301	0.00025	0.00295117	CAMK_CAMK_like.20 - CAMK includes calcium/calmodulin depedent protein kinases, expressed
LOC_Os02g30150	Chr2:17910630-17915473	0.410763	0.945034	1.20206	1.78741	0.0075	0.043523	disease resistance protein, putative, expressed
LOC_Os06g29730	Chr6:17066918-17068618	346.193	794.989	1.19936	3.53329	5e-05	0.00072992	RALFL28 - Rapid ALkalinization Factor RALF family protein precursor, expressed
LOC_Os01g12920	Chr1:7176106-7177066	7.70998	17.6929	1.19838	2.24217	0.0008	0.00773994	thioesterase family protein, putative, expressed
LOC_Os03g10100	Chr3:5112101-5114453	4.75967	10.9118	1.19695	2.75298	5e-05	0.00072992	transporter family protein, putative, expressed
LOC_Os04g59600	Chr4:35439338-35443771	10.9735	25.1533	1.19672	3.32743	5e-05	0.00072992	pentatricopeptide, putative, expressed
LOC_Os03g55930	Chr3:31845363-31847238	7.13436	16.3364	1.19524	2.32481	0.00015	0.00189973	ribosomal protein, putative, expressed
LOC_Os01g45450	Chr1:25788701-25790988	6.89167	15.7784	1.19502	2.86465	5e-05	0.00072992	AAA family ATPase, putative, expressed
LOC_Os12g38051	Chr12:23382983-23391427	17.4571	39.9242	1.19345	2.6246	5e-05	0.00072992	metallothionein, putative, expressed
LOC_Os06g08670	Chr6:4321606-4325283	8.58513	19.6297	1.19313	2.65082	5e-05	0.00072992	glutathione peroxidase, putative, expressed
LOC_Os08g01480	Chr8:296907-298367	3.73092	8.52785	1.19265	2.11476	0.00045	0.00480686	cytochrome P450, putative, expressed
LOC_Os10g35030	Chr10:18687522-18693653	1.234	2.82058	1.19265	1.88938	0.0023	0.017873	IAP100, putative, expressed
LOC_Os12g35550	Chr12:21614835-21617503	16.6518	38.057	1.19249	2.9066	5e-05	0.00072992	expressed protein
LOC_Os06g05480	Chr6:2477491-2478406	74.7904	170.92	1.1924	3.73885	5e-05	0.00072992	expressed protein
LOC_Os04g55230	Chr4:32835168-32848481	13.6822	31.2493	1.19152	3.5261	5e-05	0.00072992	tetratricopeptide repeat domain containing protein, putative, expressed
LOC_Os04g59440	Chr4:35337066-35338192	16.1879	36.959	1.19101	2.31306	0.0001	0.00135054	chlorophyll A-B binding protein, putative, expressed
LOC_Os02g16630	Chr2:9502441-9505462	5.91472	13.5025	1.19084	2.66303	5e-05	0.00072992	tryptophan biosynthesis protein trpCF, putative, expressed
LOC_Os01g48380	Chr1:27725323-27732481	3.76472	8.59134	1.19034	3.07774	5e-05	0.00072992	PPR repeat domain containing protein, putative, expressed
LOC_Os01g04130	Chr1:1815768-1817554	11.1909	25.5264	1.18966	1.87641	0.0079	0.0451293	peptidyl-tRNA hydrolase, mitochondrial precursor protein, putative, expressed
LOC_Os02g05830	Chr2:2874933-2876452	12.3978	28.2678	1.18907	2.59718	5e-05	0.00072992	ribulose bisphosphate carboxylase small chain, chloroplast precursor, putative, expressed
LOC_Os09g31482	Chr9:18985506-18987209	79.7026	181.274	1.18548	3.51857	5e-05	0.00072992	splicing factor U2AF, putative, expressed
LOC_Os04g06590	Chr4:3465244-3470783	1.19457	2.71561	1.18478	1.97592	0.002	0.0160445	expressed protein
LOC_Os10g30410	Chr10:15806653-15811018	1.0205	2.31889	1.18416	1.71131	0.00675	0.04027	cytochrome P450 71D7, putative, expressed
LOC_Os05g15530	Chr5:8785447-8787593	16.9091	38.3818	1.18262	3.29574	5e-05	0.00072992	aminotransferase domain containing protein, putative, expressed
LOC_Os02g02770	Chr2:1047594-1050120	2.14411	4.86605	1.18238	2.25737	0.0001	0.00135054	PPR repeat domain containing protein, putative, expressed
LOC_Os10g38080	Chr10:20389638-20392319	13.533	30.7074	1.18211	4.02584	5e-05	0.00072992	OsSub61 - Putative Subtilisin homologue, expressed
LOC_Os01g59510	Chr1:34412852-34416988	2.73091	6.19376	1.18144	2.31117	0.00035	0.00391428	chloroplast ribonuclease III domain protein, putative, expressed
LOC_Os02g44980	Chr2:27244827-27246981	90.9117	206.143	1.18111	3.8959	5e-05	0.00072992	transmembrane amino acid transporter protein, putative, expressed
LOC_Os02g43330	Chr2:26143308-26144731	5.66767	12.8498	1.18092	2.37935	0.0003	0.00344573	homeobox associated leucine zipper, putative, expressed
LOC_Os10g38630	Chr10:20599871-20601934	107.541	243.811	1.18088	3.83405	5e-05	0.00072992	glutathione S-transferase, putative, expressed
LOC_Os06g29630	Chr6:16991719-16994085	7.23806	16.4028	1.18026	3.16062	5e-05	0.00072992	transposon protein, putative, unclassified, expressed
LOC_Os01g47262	Chr1:27008802-27012114	31.3684	71.0476	1.17948	3.38149	5e-05	0.00072992	AMSH-like protease, putative, expressed
LOC_Os02g40040	Chr2:24240086-24242558	21.9832	49.7811	1.1792	3.04925	5e-05	0.00072992	expressed protein
LOC_Os02g15704	Chr2:8850622-8851897	9.15063	20.7156	1.17877	2.81646	5e-05	0.00072992	expressed protein
LOC_Os04g16722	Chr4:9094074-9098277	12.1906	27.5881	1.17827	3.33761	5e-05	0.00072992	uncharacterized protein ycf68, putative, expressed
LOC_Os03g63310	Chr3:35777908-35781336	5.12148	11.5536	1.17371	2.9543	5e-05	0.00072992	cytochrome P450 71E1, putative, expressed
LOC_Os04g38950	Chr4:23139157-23142821	21.9983	49.5916	1.1727	3.17779	5e-05	0.00072992	class I glutamine amidotransferase, putative, expressed
LOC_Os02g43600	Chr2:26317493-26320435	6.17421	13.9172	1.17254	2.25506	0.00015	0.00189973	50S ribosomal protein L19, chloroplast precursor, putative, expressed
LOC_Os12g38640	Chr12:23735745-23736790	16.0994	36.2625	1.17147	2.80296	0.0001	0.00135054	expressed protein
LOC_Os05g11650	Chr5:6606021-6607745	4.30533	9.69519	1.17115	3.02381	0.0005	0.0052468	GIL1, putative, expressed
LOC_Os01g53220	Chr1:30582484-30583743	8.36315	18.8237	1.17043	2.66826	5e-05	0.00072992	HSF-type DNA-binding domain containing protein, expressed
LOC_Os02g02390	Chr2:818980-824546	4.80413	10.8099	1.17	3.02992	5e-05	0.00072992	S1 RNA binding domain containing protein, expressed
LOC_Os01g61510	Chr1:35585864-35588377	4.91825	11.0636	1.16961	2.76399	5e-05	0.00072992	ammonium transporter protein, putative, expressed
LOC_Os03g63360	Chr3:35806038-35808915	6.61079	14.8669	1.16921	2.45579	0.00015	0.00189973	glutathione S-transferase, putative, expressed
LOC_Os10g39930	Chr10:21368383-21373363	1.39359	3.13311	1.16878	1.85363	0.0015	0.0128149	cytochrome P450 97B2, putative, expressed
LOC_Os04g39780	Chr4:23698661-23707348	0.579819	1.30239	1.16749	2.15137	0.00045	0.00480686	AMP-binding enzyme family protein, expressed
LOC_Os06g22919	Chr6:13375502-13390470	12.0431	27.046	1.16721	2.35146	0.00275	0.0204362	DEFL9 - Defensin and Defensin-like DEFL family, expressed
LOC_Os01g07060	Chr1:3320450-3321035	6.4066	14.3835	1.16678	1.8309	0.006	0.0368861	POEI43 - Pollen Ole e I allergen and extensin family protein precursor, putative, expressed
LOC_Os03g17600	Chr3:9788872-9791862	6.25637	14.0427	1.16642	2.13192	0.0005	0.0052468	expressed protein
LOC_Os08g36320	Chr8:22878667-22882948	48.6593	109.136	1.16534	3.29352	5e-05	0.00072992	decarboxylase, putative, expressed
LOC_Os12g14126	Chr12:8015778-8019944	0.685954	1.53803	1.1649	1.80321	0.00285	0.0210349	retrotransposon protein, putative, Ty1-copia subclass, expressed
LOC_Os07g03770	Chr7:1566063-1572187	7.13945	16.0067	1.16479	2.79886	5e-05	0.00072992	Homeobox domain containing protein, expressed
LOC_Os01g58470	Chr1:33803153-33805393	2.83094	6.34685	1.16476	1.86979	0.0029	0.0212917	expressed protein
LOC_Os08g05280	Chr8:2756965-2765155	1.20801	2.70765	1.16441	1.90052	0.00155	0.0131947	oxidoreductase family, NAD-binding Rossmann fold containing protein, expressed
LOC_Os07g33910	Chr7:20277395-20279936	1.45456	3.25949	1.16406	1.93051	0.00135	0.0117355	transporter family protein, putative, expressed
LOC_Os09g33550	Chr9:19783523-19786777	9.75678	21.8553	1.16351	3.11622	5e-05	0.00072992	CCT/B-box zinc finger protein, putative, expressed
LOC_Os01g11860	Chr1:6412785-6419895	6.33321	14.1822	1.16307	2.74523	0.0002	0.00243581	DJ-1 family protein, putative, expressed
LOC_Os09g34340	Chr9:20272778-20274461	8.82112	19.7462	1.16254	2.75375	5e-05	0.00072992	expressed protein
LOC_Os01g22900	Chr1:12870227-12874264	12.3412	27.5956	1.16095	3.29182	5e-05	0.00072992	neutral/alkaline invertase, putative, expressed
LOC_Os04g51610	Chr4:30572094-30584308	17.8125	39.804	1.16002	3.48847	5e-05	0.00072992	calcium-transporting ATPase, plasma membrane-type, putative, expressed
LOC_Os02g55540	Chr2:34007566-34010089	3.34849	7.48235	1.15998	1.92092	0.0017	0.0141133	F-box/LRR-repeat protein 14, putative, expressed
LOC_Os02g56840	Chr2:34833866-34836156	28.57	63.8319	1.15978	3.27604	5e-05	0.00072992	OsFBX70 - F-box domain containing protein, expressed
LOC_Os11g23790	Chr11:13460526-13466808	7.02962	15.6956	1.15884	2.88687	5e-05	0.00072992	expressed protein
LOC_Os12g03899	Chr12:1606072-1620845	25.8071	57.6092	1.15853	3.3968	5e-05	0.00072992	major facilitator superfamily antiporter, putative, expressed
LOC_Os07g31884	Chr7:18956321-18963235	47.991	107.092	1.15801	3.80162	5e-05	0.00072992	MATE efflux family protein, putative, expressed
LOC_Os01g54540	Chr1:31367014-31369416	12.9702	28.9417	1.15795	2.77849	5e-05	0.00072992	ribosomal protein L13, putative, expressed
LOC_Os03g08940	Chr3:4635137-4636315	16.636	37.0938	1.15687	2.49649	0.00105	0.0096341	expressed protein
LOC_Os04g41540	Chr4:24640381-24641575	7.93168	17.6769	1.15616	2.73581	0.00015	0.00189973	OsCML22 - Calmodulin-related calcium sensor protein, expressed
LOC_Os03g61590	Chr3:34923275-34923820	13.5371	30.1501	1.15525	2.18766	0.00145	0.0124502	expressed protein
LOC_Os06g22060	Chr6:12794241-12800358	6.2624	13.9443	1.15488	2.92013	5e-05	0.00072992	pyrophosphate--fructose 6-phosphate 1-phosphotransferase subunit alpha, putative, expressed
LOC_Os09g02770	Chr9:1255784-1257020	4.46139	9.93171	1.15455	2.33515	0.0022	0.0172309	translation initiation factor IF-2, putative, expressed
LOC_Os06g42660	Chr6:25655523-25656230	7.17675	15.9684	1.15382	2.10221	0.0029	0.0212917	expressed protein
LOC_Os01g01190	Chr1:89652-91521	2.46117	5.47545	1.15363	2.27251	0.00125	0.0110436	phosphoesterase family protein, putative, expressed
LOC_Os02g38820	Chr2:23465968-23468071	5.25955	11.6893	1.15217	2.41632	0.0002	0.00243581	expressed protein
LOC_Os01g04630	Chr1:2074752-2077903	29.7373	66.0739	1.15181	3.37977	5e-05	0.00072992	muconate cycloisomerase, putative, expressed
LOC_Os12g39200	Chr12:24137774-24141860	43.1737	95.9203	1.15168	3.34471	5e-05	0.00072992	seed maturation protein PM23, putative, expressed
LOC_Os06g39690	Chr6:23559641-23563074	2.81253	6.2478	1.15148	2.03523	0.00085	0.00814427	SOUL heme-binding protein, putative, expressed
LOC_Os06g30820	Chr6:17871083-17874266	7.2998	16.2092	1.15088	1.88567	0.0053	0.0336694	expressed protein
LOC_Os07g46990	Chr7:28075548-28077667	225.819	500.929	1.14944	3.29712	5e-05	0.00072992	copper/zinc superoxide dismutase, putative, expressed
LOC_Os05g07810	Chr5:4205346-4207821	2.80345	6.21809	1.14927	1.67226	0.00755	0.043696	universal stress protein domain containing protein, putative, expressed
LOC_Os01g24030	Chr1:13539761-13541958	3.11708	6.90949	1.14839	2.77271	0.0006	0.00612607	AMP-binding enzyme, putative, expressed
LOC_Os04g45490	Chr4:26917881-26920646	8.03101	17.7916	1.14754	3.12754	5e-05	0.00072992	elongation factor, putative, expressed
LOC_Os03g57200	Chr3:32619181-32620289	203.198	449.496	1.14542	4.19929	5e-05	0.00072992	glutathione S-transferase, putative, expressed
LOC_Os05g10670	Chr5:5846044-5848291	35.1234	77.696	1.14541	3.59531	5e-05	0.00072992	zinc finger CCCH type family protein, putative, expressed
LOC_Os05g33010	Chr5:19353552-19357897	7.78263	17.2142	1.14527	2.36327	0.0003	0.00344573	heat shock protein DnaJ, putative, expressed
LOC_Os11g16550	Chr11:9177005-9178578	7.41859	16.3988	1.14438	2.5546	5e-05	0.00072992	uncharacterized protein ycf53, putative, expressed
LOC_Os01g52170	Chr1:30008280-30012094	1.87268	4.13844	1.14399	1.95169	0.0012	0.0107172	expressed protein
LOC_Os07g42885	Chr7:25675077-25676745	1.40514	3.10512	1.14394	1.93478	0.0071	0.0417926	retrotransposon protein, putative, Ty1-copia subclass, expressed
LOC_Os01g41890	Chr1:23746839-23751713	1.31467	2.90513	1.1439	1.96574	0.0019	0.0154399	MLA1, putative, expressed
LOC_Os02g12660	Chr2:6608060-6614191	1.96149	4.33172	1.14299	2.06152	0.0006	0.00612607	protein kinase domain containing protein, putative, expressed
LOC_Os03g49710	Chr3:28301287-28303246	14.3937	31.7815	1.14274	2.58992	5e-05	0.00072992	ribosomal protein S13p/S18e, putative, expressed
LOC_Os01g59060	Chr1:34133776-34135646	9.32788	20.5867	1.14209	2.15485	0.0008	0.00773994	50S ribosomal protein, putative, expressed
LOC_Os02g02520	Chr2:896073-900377	7.80891	17.2318	1.14188	2.59529	5e-05	0.00072992	expressed protein
LOC_Os03g25960	Chr3:14866652-14868768	11.4177	25.1578	1.13973	2.70122	5e-05	0.00072992	RNA recognition motif containing protein, putative, expressed
LOC_Os06g31890	Chr6:18524660-18525770	100.034	220.332	1.13919	2.96628	5e-05	0.00072992	THION3 - Plant thionin family protein precursor, expressed
LOC_Os01g43370	Chr1:24808513-24813403	30.926	68.0983	1.1388	3.30845	5e-05	0.00072992	CPuORF17 - conserved peptide uORF-containing transcript, expressed
LOC_Os04g32770	Chr4:19766025-19771877	0.658458	1.4496	1.13849	1.9024	0.002	0.0160445	retrotransposon protein, putative, unclassified, expressed
LOC_Os12g28770	Chr12:17009381-17011944	33.3989	73.5094	1.13813	4.5207	5e-05	0.00072992	POEI19 - Pollen Ole e I allergen and extensin family protein precursor, expressed
LOC_Os01g21420	Chr1:11957242-11964812	2.84586	6.26022	1.13735	1.91726	0.0013	0.0113923	pre-mRNA-splicing factor SF2, putative, expressed
LOC_Os05g49650	Chr5:28480920-28482905	10.2484	22.5336	1.13668	2.08812	0.00085	0.00814427	expressed protein
LOC_Os10g37660	Chr10:20154545-20159181	4.67597	10.2796	1.13645	2.60658	5e-05	0.00072992	trehalase precursor, putative, expressed
LOC_Os01g50050	Chr1:28752054-28755585	3.80299	8.35815	1.13605	2.24955	0.00025	0.00295117	polyprenyl synthetase, putative, expressed
LOC_Os12g02300	Chr12:727799-728701	9.64884	21.2038	1.1359	2.11794	0.00105	0.0096341	LTPL26 - Protease inhibitor/seed storage/LTP family protein precursor, expressed
LOC_Os02g41840	Chr2:25153198-25154265	23	50.4865	1.13426	3.20551	5e-05	0.00072992	DUF584 domain containing protein, putative, expressed
LOC_Os06g14450	Chr6:8116248-8119850	2.04015	4.47725	1.13394	2.06361	0.0008	0.00773994	exo70 exocyst complex subunit family protein, putative, expressed
LOC_Os03g01014	Chr3:13192-16729	8.87743	19.4674	1.13285	2.87241	5e-05	0.00072992	expressed protein
LOC_Os03g14040	Chr3:7615917-7618928	4.93443	10.7959	1.12953	1.91577	0.00155	0.0131947	expressed protein
LOC_Os08g43334	Chr8:27380764-27390339	3.845	8.41082	1.12926	2.29128	0.00095	0.00888084	HSF-type DNA-binding domain containing protein, expressed
LOC_Os04g58030	Chr4:34564383-34566060	3.21462	7.02587	1.12803	2.05127	0.0008	0.00773994	expressed protein
LOC_Os01g65920	Chr1:38275054-38279030	55.9446	122.208	1.12726	3.37061	5e-05	0.00072992	F-box/LRR-repeat protein 2, putative, expressed
LOC_Os03g50500	Chr3:28830825-28836835	2.15317	4.70321	1.12718	2.41013	5e-05	0.00072992	PPR repeat domain containing protein, putative, expressed
LOC_Os10g37670	Chr10:20160991-20162434	5.53877	12.0954	1.12682	1.84284	0.00245	0.018727	actin-depolymerizing factor, putative, expressed
LOC_Os07g44550	Chr7:26603636-26604970	92.4364	201.569	1.12474	4.23631	5e-05	0.00072992	peroxidase precursor, putative, expressed
LOC_Os12g30824	Chr12:18509842-18528700	1.48458	3.23725	1.12472	1.89907	0.0016	0.013514	terpene synthase, putative, expressed
LOC_Os07g08150	Chr7:4143339-4144573	17.2877	37.6766	1.12392	2.66886	0.0001	0.00135054	early light-induced protein, chloroplast precursor, putative, expressed
LOC_Os09g39390	Chr9:22649086-22652085	12.5519	27.3533	1.12381	2.92722	5e-05	0.00072992	oxidoreductase, aldo/keto reductase family protein, putative, expressed
LOC_Os05g31525	Chr5:18340310-18340856	9.77338	21.2875	1.12308	1.84923	0.00475	0.0309602	expressed protein
LOC_Os02g01210	Chr2:119390-121707	11.4115	24.8534	1.12295	3.14176	5e-05	0.00072992	amino acid transporter, putative, expressed
LOC_Os03g60910	Chr3:34609760-34614454	8.11437	17.6683	1.12262	3.10998	5e-05	0.00072992	PPR repeat domain containing protein, putative, expressed
LOC_Os02g33500	Chr2:19924353-19928340	6.12241	13.3109	1.12044	2.82149	5e-05	0.00072992	threonyl-tRNA synthetase, putative, expressed
LOC_Os06g35540	Chr6:20727091-20731771	7.99012	17.3704	1.12035	2.83965	5e-05	0.00072992	aminotransferase, classes I and II, domain containing protein, expressed
LOC_Os07g49470	Chr7:29630559-29633467	1.15086	2.50118	1.1199	1.71487	0.0055	0.0345254	protein kinase APK1B, chloroplast precursor, putative, expressed
LOC_Os02g40900	Chr2:24783194-24786565	4.23201	9.19738	1.11988	2.06069	0.0009	0.00853065	RNA recognition motif containing protein, putative, expressed
LOC_Os03g53170	Chr3:30502404-30507088	4.5436	9.87057	1.1193	2.72237	5e-05	0.00072992	pentatricopeptide, putative, expressed
LOC_Os07g30800	Chr7:18228559-18232364	3.01067	6.53966	1.11913	1.89181	0.00145	0.0124502	immunophilin, putative, expressed
LOC_Os10g33990	Chr10:18129551-18130135	14.0193	30.4444	1.11876	1.89722	0.0018	0.0147583	DUF584 domain containing protein, putative, expressed
LOC_Os02g39000	Chr2:23559739-23561669	3.08667	6.70295	1.11874	2.15715	0.00185	0.0150851	remorin C-terminal domain containing protein, putative, expressed
LOC_Os02g30714	Chr2:18296251-18310135	10.5148	22.8074	1.11708	2.73105	5e-05	0.00072992	dehydrogenase/reductase, putative, expressed
LOC_Os01g25990	Chr1:14730141-14738424	5.63733	12.223	1.11652	2.86301	5e-05	0.00072992	expressed protein
LOC_Os10g36260	Chr10:19379765-19382033	22.4239	48.6084	1.11617	3.28234	5e-05	0.00072992	expressed protein
LOC_Os06g44450	Chr6:26843086-26844776	44.2114	95.8296	1.11605	4.22176	5e-05	0.00072992	CCT/B-box zinc finger protein, putative, expressed
LOC_Os05g10650	Chr5:5813264-5815545	10.7417	23.2809	1.11593	3.30505	5e-05	0.00072992	6-phosphofructokinase, putative, expressed
LOC_Os04g53310	Chr4:31749102-31759581	6.26666	13.575	1.11518	3.29169	5e-05	0.00072992	soluble starch synthase 3, chloroplast precursor, putative, expressed
LOC_Os05g01970	Chr5:552020-561773	5.641	12.2196	1.11518	2.35855	5e-05	0.00072992	NAD dependent epimerase/dehydratase family protein, putative, expressed
LOC_Os12g31860	Chr12:19180633-19185917	38.8525	84.0905	1.11393	3.35739	5e-05	0.00072992	ureide permease, putative, expressed
LOC_Os03g52380	Chr3:30076354-30077045	23.7048	51.2994	1.11376	2.3876	0.00015	0.00189973	PIII5 - Proteinase inhibitor II family protein precursor, expressed
LOC_Os01g39020	Chr1:21938864-21941839	3.46768	7.50009	1.11294	2.14783	0.00045	0.00480686	HSF-type DNA-binding domain containing protein, expressed
LOC_Os02g44770	Chr2:27117990-27124462	2.27046	4.90269	1.11059	1.60812	0.0075	0.043523	uncharacterized mscS family protein, putative, expressed
LOC_Os01g51030	Chr1:29317539-29318159	20.7358	44.7726	1.11049	2.59719	0.00015	0.00189973	expressed protein
LOC_Os08g19374	Chr8:11587792-11590913	20.7842	44.8762	1.11046	2.83013	5e-05	0.00072992	expressed protein
LOC_Os01g21820	Chr1:12235261-12248213	6.14526	13.2668	1.11028	3.08217	5e-05	0.00072992	preprotein translocase subunit secA, chloroplast precursor, putative, expressed
LOC_Os03g10320	Chr3:5261709-5263669	21.198	45.7278	1.10914	3.19668	5e-05	0.00072992	expressed protein
LOC_Os12g08800	Chr12:4527361-4532890	1.98709	4.28513	1.10868	2.34656	5e-05	0.00072992	las1-like family protein, putative, expressed
LOC_Os01g03040	Chr1:1160151-1164635	5.81357	12.5264	1.10748	2.11351	0.0006	0.00612607	expressed protein
LOC_Os02g39330	Chr2:23742940-23744109	5.58049	12.0212	1.10712	2.08582	0.0007	0.00697948	CHIT1 - Chitinase family protein precursor, expressed
LOC_Os01g66900	Chr1:38852995-38854277	5.47487	11.7849	1.10604	2.11961	0.00745	0.0432962	expressed protein
LOC_Os06g45340	Chr6:27402361-27403768	8.71747	18.7606	1.10572	2.49454	0.00025	0.00295117	peptidyl-prolyl cis-trans isomerase, FKBP-type, putative, expressed
LOC_Os01g10110	Chr1:5270102-5275678	2.32029	4.99244	1.10544	1.95033	0.00215	0.0169396	cytokinin dehydrogenase precursor, putative, expressed
LOC_Os08g37630	Chr8:23847947-23848388	23.3287	50.1795	1.105	2.08393	0.00265	0.0199294	elastin precursor, putative, expressed
LOC_Os03g26229	Chr3:15005894-15008260	25.4743	54.7681	1.10429	2.99287	5e-05	0.00072992	40S ribosomal protein S9-1, putative, expressed
LOC_Os06g39330	Chr6:23333336-23335038	10.6206	22.8174	1.10327	3.29535	5e-05	0.00072992	UDP-glucoronosyl and UDP-glucosyl transferase domain containing protein, expressed
LOC_Os09g30458	Chr9:18558401-18563784	10.2114	21.9249	1.10239	3.73644	5e-05	0.00072992	subtilisin-like protease, putative, expressed
LOC_Os01g61430	Chr1:35518546-35523582	9.33767	20.02	1.10031	2.50361	0.0001	0.00135054	HIT zinc finger domain containing protein, expressed
LOC_Os06g09880	Chr6:5029394-5035358	1.06681	2.28684	1.10005	2.0774	0.00095	0.00888084	EMB1270, putative, expressed
LOC_Os08g02030	Chr8:655747-657391	27.4698	58.8371	1.09888	3.71011	5e-05	0.00072992	transferase family protein, putative, expressed
LOC_Os05g29710	Chr5:17175701-17177087	39.7716	85.1637	1.0985	3.67052	5e-05	0.00072992	RING-H2 finger protein, putative, expressed
LOC_Os06g33549	Chr6:19531561-19542004	5.96053	12.7494	1.09692	2.33888	0.0002	0.00243581	protein phosphatase 2C, putative, expressed
LOC_Os03g57840	Chr3:32951543-32956889	6.16325	13.1779	1.09635	2.57845	5e-05	0.00072992	peptidase M50, mammalian sterol-regulatory element binding protein, putative, expressed
LOC_Os07g47300	Chr7:28277519-28281063	1.46284	3.12772	1.09634	1.96998	0.00135	0.0117355	spo0B-associated GTP-binding protein, putative, expressed
LOC_Os06g03990	Chr6:1629716-1633629	9.88456	21.1314	1.09614	2.93301	5e-05	0.00072992	aminotransferase, classes I and II, domain containing protein, expressed
LOC_Os02g12440	Chr2:6487389-6490577	1.55073	3.31387	1.09557	2.21618	0.0011	0.010008	receptor kinase, putative, expressed
LOC_Os01g42720	Chr1:24300143-24301233	13.8483	29.5857	1.0952	2.34487	0.0002	0.00243581	expressed protein
LOC_Os04g39980	Chr4:23795408-23797531	68.1254	145.516	1.09491	3.79364	5e-05	0.00072992	gibberellin 20 oxidase 2, putative, expressed
LOC_Os02g51470	Chr2:31526903-31528541	15.7692	33.6757	1.0946	2.78498	5e-05	0.00072992	ATP synthase F1, delta subunit family protein, putative, expressed
LOC_Os03g58540	Chr3:33334429-33338512	2.01734	4.30752	1.09441	1.93791	0.0018	0.0147583	spo0B-associated GTP-binding protein, putative, expressed
LOC_Os04g50110	Chr4:29888071-29891194	3.15444	6.73387	1.09405	1.99274	0.0009	0.00853065	RNA recognition motif containing protein, putative, expressed
LOC_Os12g12850	Chr12:7095796-7101614	21.2664	45.3744	1.0933	3.21019	5e-05	0.00072992	ATP-dependent Clp protease ATP-binding subunit clpA homolog,chloroplast precursor, putative, expressed
LOC_Os10g01134	Chr10:110137-116454	24.2247	51.6636	1.09267	3.3439	5e-05	0.00072992	OsSCP46 - Putative Serine Carboxypeptidase homologue, expressed
LOC_Os01g25600	Chr1:14506672-14513164	1.57658	3.36222	1.09261	1.73305	0.0041	0.0278678	tetratricopeptide repeat domain containing protein, expressed
LOC_Os07g45260	Chr7:27006622-27008541	5.50055	11.729	1.09243	2.76301	0.00015	0.00189973	glycosyl transferase 8 domain containing protein, putative, expressed
LOC_Os02g03050	Chr2:1198095-1202330	2.4643	5.25214	1.09173	1.89496	0.0013	0.0113923	dimethyladenosine transferase, putative, expressed
LOC_Os01g37590	Chr1:21038805-21041083	2.64302	5.63264	1.09163	2.07166	0.00205	0.01633	peptide transporter PTR2, putative, expressed
LOC_Os01g56180	Chr1:32346888-32350138	27.9952	59.6289	1.09083	3.24757	5e-05	0.00072992	expressed protein
LOC_Os12g39520	Chr12:24359078-24360593	7.1471	15.2121	1.08979	2.5497	0.0001	0.00135054	OsFBDUF66 - F-box and DUF domain containing protein, expressed
LOC_Os05g32480	Chr5:18969219-18976160	1.7815	3.79155	1.08969	1.92286	0.00205	0.01633	transposon protein, putative, unclassified, expressed
LOC_Os10g31670	Chr10:16599487-16600321	25.5422	54.3566	1.08957	2.7379	5e-05	0.00072992	retrotransposon protein, putative, unclassified, expressed
LOC_Os01g48300	Chr1:27677193-27681560	9.26106	19.6979	1.08879	2.74548	5e-05	0.00072992	ATP synthase protein I related, putative, expressed
LOC_Os05g42100	Chr5:24623312-24624621	2.17511	4.61928	1.08658	1.69168	0.0088	0.0488752	expressed protein
LOC_Os07g38300	Chr7:23003379-23008497	8.9857	19.0718	1.08574	2.63165	5e-05	0.00072992	ribosome recycling factor, putative, expressed
LOC_Os08g06630	Chr8:3732440-3736521	2.79461	5.92876	1.08509	2.12516	0.00025	0.00295117	RNA polymerase sigma factor, putative, expressed
LOC_Os06g07914	Chr6:3846105-3848325	11.7207	24.8504	1.08421	3.09016	5e-05	0.00072992	hydroxylase, putative, expressed
LOC_Os05g49800	Chr5:28579193-28582615	49.2164	104.337	1.08403	3.19287	5e-05	0.00072992	ketol-acid reductoisomerase, chloroplast precursor, putative, expressed
LOC_Os01g50590	Chr1:29045048-29047994	4.26105	9.03181	1.08381	2.1849	0.00065	0.00656619	cytochrome P450, putative, expressed
LOC_Os02g52990	Chr2:32418492-32419361	35.9821	76.244	1.08334	3.51272	5e-05	0.00072992	OsSAUR12 - Auxin-responsive SAUR gene family member, expressed
LOC_Os04g49000	Chr4:29213190-29214430	14.405	30.5195	1.08316	2.86826	5e-05	0.00072992	zinc finger, C3HC4 type domain containing protein, expressed
LOC_Os05g51740	Chr5:29677514-29682272	1.10134	2.33271	1.08274	2.01745	0.0025	0.0190176	receptor protein kinase CLAVATA1 precursor, putative, expressed
LOC_Os02g45780	Chr2:27886976-27888250	7.03856	14.9068	1.08262	2.27101	0.0009	0.00853065	zinc finger, C3HC4 type domain containing protein, expressed
LOC_Os01g32330	Chr1:17740973-17742308	78.9063	167.095	1.08246	3.22231	5e-05	0.00072992	heavy metal-associated domain containing protein, expressed
LOC_Os01g01660	Chr1:327127-328451	60.6526	128.375	1.08172	3.44891	5e-05	0.00072992	isoflavone reductase, putative, expressed
LOC_Os02g55530	Chr2:34000668-34006651	6.78712	14.3623	1.08142	2.63056	5e-05	0.00072992	neurochondrin family protein, putative, expressed
LOC_Os04g36760	Chr4:22203112-22203965	23.1585	49.0019	1.0813	2.51905	5e-05	0.00072992	enzyme of the cupin superfamily protein, putative, expressed
LOC_Os04g55180	Chr4:32801072-32807530	1.63153	3.45215	1.08128	1.6624	0.0077	0.0442843	hydrolase, alpha/beta fold family domain containing protein, expressed
LOC_Os10g31460	Chr10:16494292-16495238	10.0723	21.3081	1.08102	1.96597	0.0018	0.0147583	retrotransposon protein, putative, unclassified, expressed
LOC_Os09g27795	Chr9:16909445-16910295	5.33513	11.2865	1.081	1.88486	0.0035	0.0247212	expressed protein
LOC_Os01g73450	Chr1:42562816-42566993	12.0952	25.5756	1.08034	2.71193	5e-05	0.00072992	amino acid kinase, putative, expressed
LOC_Os07g46520	Chr7:27783647-27786920	8.42693	17.8114	1.07972	2.39833	5e-05	0.00072992	rhythmically expressed gene 2 protein, putative, expressed
LOC_Os04g12970	Chr4:7156819-7159820	2.65407	5.60689	1.07899	1.91773	0.00235	0.0181608	UDP-glucoronosyl/UDP-glucosyl transferase, putative, expressed
LOC_Os02g38020	Chr2:22971562-22975296	2.05177	4.33219	1.07823	1.97826	0.0009	0.00853065	inorganic phosphate transporter 2-1, chloroplast precursor, putative, expressed
LOC_Os03g44150	Chr3:24810050-24818067	22.8062	48.1431	1.0779	3.20699	5e-05	0.00072992	aminotransferase, putative, expressed
LOC_Os05g34630	Chr5:20536275-20539844	2.4539	5.1775	1.07718	1.88011	0.0025	0.0190176	hydrolase, alpha/beta fold family domain containing protein, expressed
LOC_Os02g47470	Chr2:28995716-28998581	10.427	21.9976	1.07702	3.09966	5e-05	0.00072992	cytochrome P450, putative, expressed
LOC_Os02g28220	Chr2:16702130-16703949	10.4454	22.0273	1.07643	3.15647	5e-05	0.00072992	transferase family protein, putative, expressed
LOC_Os04g23220	Chr4:13220129-13225106	1.29621	2.73079	1.07502	2.12457	0.00435	0.0291019	expressed protein
LOC_Os09g09930	Chr9:5395172-5396935	59.1262	124.554	1.0749	3.22661	5e-05	0.00072992	heavy metal transport/detoxification protein, putative, expressed
LOC_Os09g15670	Chr9:9567470-9568905	27.3592	57.6318	1.07484	3.52397	5e-05	0.00072992	protein phosphatase 2C, putative, expressed
LOC_Os08g34170	Chr8:21418715-21421093	34.0928	71.8006	1.07453	3.25664	5e-05	0.00072992	CAF1 family ribonuclease containing protein, putative, expressed
LOC_Os01g14540	Chr1:8152629-8153685	4.68729	9.86224	1.07316	1.83906	0.00205	0.01633	STIGL1 - Stigma-specific Stig1 family protein precursor, expressed
LOC_Os10g25040	Chr10:12890903-12894595	3.68293	7.74864	1.07309	2.1124	0.0007	0.00697948	red chlorophyll catabolite reductase, putative, expressed
LOC_Os09g36240	Chr9:20897578-20903515	2.23554	4.70012	1.07208	2.06321	0.00105	0.0096341	deoxyribodipyrimidine photolyase family protein, expressed
LOC_Os01g18080	Chr1:10133856-10135806	106.823	224.508	1.07155	3.00647	5e-05	0.00072992	retrotransposon protein, putative, unclassified, expressed
LOC_Os05g47680	Chr5:27320572-27322871	1.83417	3.8543	1.07134	1.98815	0.00565	0.0351887	expressed protein
LOC_Os09g39180	Chr9:22505002-22507555	11.5193	24.2054	1.07127	2.67353	5e-05	0.00072992	RNA recognition motif containing protein, putative, expressed
LOC_Os11g12810	Chr11:7255765-7263164	6.0601	12.7264	1.07041	3.57011	5e-05	0.00072992	sucrose-phosphate synthase, putative, expressed
LOC_Os01g04620	Chr1:2071829-2073621	22.2467	46.6866	1.06942	3.39222	5e-05	0.00072992	transposon protein, putative, unclassified, expressed
LOC_Os03g22780	Chr3:13155799-13157404	3.58151	7.5077	1.06781	2.11771	0.0016	0.013514	DVR, putative, expressed
LOC_Os04g39600	Chr4:23599539-23600705	10.6448	22.3049	1.06722	2.86769	0.0006	0.00612607	fasciclin domain containing protein, expressed
LOC_Os02g41580	Chr2:24934933-24936468	36.3888	76.1968	1.06623	3.61516	5e-05	0.00072992	CAMK_CAMK_like.14 - CAMK includes calcium/calmodulin depedent protein kinases, expressed
LOC_Os03g11734	Chr3:6131844-6142785	31.1533	65.2143	1.0658	3.10217	5e-05	0.00072992	MATE efflux protein, putative, expressed
LOC_Os10g32080	Chr10:16851911-16853554	2.48146	5.19361	1.06555	2.08959	0.0062	0.037784	xyloglucan galactosyltransferase KATAMARI1, putative, expressed
LOC_Os09g34120	Chr9:20145578-20146567	13.0842	27.3665	1.06459	2.7308	0.0003	0.00344573	expressed protein
LOC_Os05g33400	Chr5:19631961-19633443	12.8536	26.8814	1.06443	3.11304	5e-05	0.00072992	basic 7S globulin precursor, putative, expressed
LOC_Os10g32400	Chr10:16981455-16989699	10.5522	22.067	1.06434	2.38945	0.0001	0.00135054	PsbP, putative, expressed
LOC_Os06g22050	Chr6:12781810-12782943	7.4589	15.5976	1.06429	2.17521	0.00065	0.00656619	GCRP2 - Glycine and cysteine rich family protein precursor, putative, expressed
LOC_Os02g57280	Chr2:35091193-35099291	7.51112	15.7062	1.06423	1.64648	0.0049	0.0317208	CBS domain containing membrane protein, putative, expressed
LOC_Os09g23894	Chr9:14251018-14252175	31.3463	65.4715	1.06257	3.43477	5e-05	0.00072992	expressed protein
LOC_Os06g23114	Chr6:13476486-13485209	8.82002	18.4029	1.06108	2.94486	5e-05	0.00072992	copper methylamine oxidase precursor, putative, expressed
LOC_Os08g05510	Chr8:2934785-2940197	33.3875	69.6541	1.0609	3.10805	5e-05	0.00072992	MYB family transcription factor, putative, expressed
LOC_Os12g44110	Chr12:27359423-27361454	8.04035	16.7659	1.0602	3.01876	5e-05	0.00072992	ligA, putative, expressed
LOC_Os03g04900	Chr3:2342157-2343175	4.8593	10.1326	1.06018	1.6163	0.00465	0.0304668	MYB family transcription factor, putative, expressed
LOC_Os08g34220	Chr8:21450961-21455969	4.16954	8.68497	1.05863	2.29564	0.00015	0.00189973	omega-6 fatty acid desaturase, chloroplast precursor, putative, expressed
LOC_Os11g10470	Chr11:5710545-5711249	9.10709	18.9677	1.05848	1.99343	0.0008	0.00773994	expressed protein
LOC_Os01g18970	Chr1:10720418-10721623	8.73678	18.1887	1.05787	2.46747	0.00235	0.0181608	peroxidase precursor, putative, expressed
LOC_Os02g54130	Chr2:33169842-33175612	41.1179	85.5737	1.0574	3.11045	5e-05	0.00072992	heat shock protein DnaJ, putative, expressed
LOC_Os06g02580	Chr6:908484-910322	4.89997	10.1973	1.05734	2.26113	0.0005	0.0052468	high-affinity nickel-transport family protein, putative, expressed
LOC_Os01g64000	Chr1:37174546-37176550	5.07038	10.5447	1.05636	2.28748	0.00015	0.00189973	bZIP transcription factor, putative, expressed
LOC_Os04g02650	Chr4:999639-1002381	3.23454	6.71471	1.05377	1.95467	0.00365	0.0254858	expressed protein
LOC_Os01g70710	Chr1:40930471-40932733	39.6913	82.378	1.05344	3.20973	5e-05	0.00072992	heavy metal-associated domain containing protein, expressed
LOC_Os12g43720	Chr12:27154448-27160461	2.45589	5.09182	1.05193	2.2823	0.00055	0.00566905	early-responsive to dehydration protein-related, putative, expressed
LOC_Os04g49690	Chr4:29636069-29638259	1.6963	3.51653	1.05176	1.87982	0.00555	0.0347386	FERONIA receptor-like kinase, putative, expressed
LOC_Os01g72160	Chr1:41847704-41849080	20.2651	41.9829	1.0508	2.60151	0.0001	0.00135054	glutathione S-transferase, putative, expressed
LOC_Os06g39906	Chr6:23732554-23734536	5.17221	10.7134	1.05057	2.22842	0.00025	0.00295117	homeobox domain containing protein, expressed
LOC_Os04g30420	Chr4:18168722-18172037	7.55488	15.6265	1.04851	2.41812	0.0005	0.0052468	dehydrogenase, putative, expressed
LOC_Os03g18880	Chr3:10575397-10576700	4.35903	9.01228	1.04789	1.92024	0.00105	0.0096341	retrotransposon protein, putative, unclassified, expressed
LOC_Os08g11480	Chr8:6734407-6739686	3.42273	7.07472	1.04752	2.70817	5e-05	0.00072992	expressed protein
LOC_Os06g12630	Chr6:6890584-6895644	8.98944	18.5751	1.04707	2.42232	5e-05	0.00072992	glutathione S-transferase, N-terminal domain containing protein, expressed
LOC_Os08g12800	Chr8:7583445-7588419	1.91753	3.96222	1.04706	1.89929	0.0034	0.0241943	glucan endo-1,3-beta-glucosidase precursor, putative, expressed
LOC_Os02g20950	Chr2:12387036-12394243	6.68983	13.822	1.04693	2.93916	5e-05	0.00072992	expressed protein
LOC_Os02g51910	Chr2:31791008-31793891	5.04172	10.4162	1.04684	2.61935	5e-05	0.00072992	cytokinin-O-glucosyltransferase 2, putative, expressed
LOC_Os04g39840	Chr4:23727919-23733947	4.40433	9.0963	1.04636	2.41005	5e-05	0.00072992	Os4bglu10 - beta-glucosidase homologue, similar to Os4Bglu12 exoglucanase/beta-glucosidase, expressed
LOC_Os02g12790	Chr2:6705603-6707734	1.66216	3.43227	1.0461	1.66087	0.0043	0.0289136	GATA zinc finger domain containing protein, expressed
LOC_Os07g09340	Chr7:4914607-4920788	36.3304	74.9756	1.04524	3.12421	5e-05	0.00072992	plasma membrane ATPase, putative, expressed
LOC_Os12g44070	Chr12:27329995-27332079	2.00864	4.14457	1.045	1.95508	0.00825	0.0465811	nodulin, putative, expressed
LOC_Os12g12880	Chr12:7130737-7132121	21.1541	43.6286	1.04434	2.98543	5e-05	0.00072992	expressed protein
LOC_Os03g10060	Chr3:5078135-5081710	18.7359	38.6382	1.04422	2.51222	5e-05	0.00072992	S10/S20 domain containing ribosomal protein, putative, expressed
LOC_Os10g03540	Chr10:1530558-1532298	20.3482	41.9629	1.04421	2.52598	5e-05	0.00072992	ribosomal protein L7Ae, putative, expressed
LOC_Os01g71080	Chr1:41139173-41140671	26.9346	55.5333	1.04389	3.5919	5e-05	0.00072992	xylanase inhibitor, putative, expressed
LOC_Os04g31350	Chr4:18757683-18758848	6.11877	12.5938	1.0414	2.05552	0.00055	0.00566905	expressed protein
LOC_Os06g47970	Chr6:29002131-29003608	6.73746	13.8665	1.04132	1.93155	0.0021	0.0166061	expressed protein
LOC_Os02g25780	Chr2:15106301-15107393	22.0598	45.3947	1.0411	3.0969	5e-05	0.00072992	expressed protein
LOC_Os12g43100	Chr12:26759581-26762370	14.5177	29.8648	1.04063	2.72625	5e-05	0.00072992	deoxyhypusine hydroxylase, putative, expressed
LOC_Os03g31150	Chr3:17738065-17741592	1.19621	2.46044	1.04044	1.66134	0.00445	0.0295056	expressed protein
LOC_Os01g09430	Chr1:4800246-4802179	27.159	55.8505	1.04014	2.94986	5e-05	0.00072992	expressed protein
LOC_Os07g01810	Chr7:467285-468754	5.53982	11.39	1.03986	2.19932	0.00075	0.00738829	potassium channel protein, putative, expressed
LOC_Os06g51350	Chr6:31100868-31102438	2.26368	4.65209	1.03921	1.72467	0.00835	0.0469675	IPP transferase, putative, expressed
LOC_Os11g03200	Chr11:1162135-1164910	6.44967	13.2337	1.03691	2.27884	0.0003	0.00344573	EMB2748, putative, expressed
LOC_Os04g42570	Chr4:25182200-25186675	1.52693	3.13298	1.0369	1.85237	0.00345	0.0244478	AP2/EREBP transcription factor BABY BOOM, putative, expressed
LOC_Os03g04260	Chr3:1954668-1955969	11.8618	24.3361	1.03678	2.34203	5e-05	0.00072992	glutathione S-transferase, putative, expressed
LOC_Os03g03360	Chr3:1430638-1435347	10.6391	21.8118	1.03574	2.59958	5e-05	0.00072992	ribosomal protein L5, putative, expressed
LOC_Os05g43040	Chr5:24997323-24999598	16.2599	33.2658	1.03272	2.71891	5e-05	0.00072992	tetratricopeptide repeat domain containing protein, expressed
LOC_Os03g51930	Chr3:29788460-29791210	15.6708	32.0584	1.03262	2.65303	5e-05	0.00072992	expressed protein
LOC_Os08g44770	Chr8:28132336-28135562	62.7279	128.115	1.03026	3.0622	5e-05	0.00072992	copper/zinc superoxide dismutase, putative, expressed
LOC_Os08g09270	Chr8:5384442-5388851	5.03404	10.2737	1.02917	2.49892	5e-05	0.00072992	pentatricopeptide, putative, expressed
LOC_Os10g04860	Chr10:2358789-2368732	15.5224	31.6785	1.02916	3.068	5e-05	0.00072992	aldehyde oxidase, putative, expressed
LOC_Os02g51480	Chr2:31529598-31531859	2.27544	4.64332	1.02901	1.86147	0.00265	0.0199294	PPR repeat domain containing protein, putative, expressed
LOC_Os08g31980	Chr8:19830327-19836087	3.04256	6.20734	1.02869	2.38275	5e-05	0.00072992	trehalose-6-phosphate synthase, putative, expressed
LOC_Os09g31130	Chr9:18715285-18718864	24.9861	50.9632	1.02833	3.32824	5e-05	0.00072992	citrate transporter, putative, expressed
LOC_Os02g56970	Chr2:34913713-34915486	2.72295	5.54542	1.02613	2.05602	0.00765	0.0440926	uncharacterized protein yqjG, putative, expressed
LOC_Os04g20474	Chr4:11450566-11455777	1.41799	2.88713	1.02579	2.02068	0.0008	0.00773994	UDP-glucoronosyl and UDP-glucosyl transferase domain containing protein, expressed
LOC_Os09g37720	Chr9:21742602-21743594	5.15598	10.4965	1.02559	2.07069	0.00535	0.0338966	RNA recognition motif containing protein, expressed
LOC_Os06g04250	Chr6:1789835-1791394	11.469	23.333	1.02464	3.02337	5e-05	0.00072992	phosphate-induced protein 1 conserved region domain containing protein, expressed
LOC_Os11g40420	Chr11:24096098-24100831	1.38032	2.80717	1.02411	1.77938	0.00265	0.0199294	expressed protein
LOC_Os02g35830	Chr2:21525888-21528977	40.0664	81.4324	1.02321	3.54614	5e-05	0.00072992	extracellular ligand-gated ion channel, putative, expressed
LOC_Os01g57420	Chr1:33182588-33192979	11.133	22.6135	1.02235	2.77178	5e-05	0.00072992	diacylglycerol kinase, putative, expressed
LOC_Os12g38150	Chr12:23427678-23428881	47.2442	95.9493	1.02214	3.18407	5e-05	0.00072992	osmotin, putative, expressed
LOC_Os09g38777	Chr9:22281488-22284212	9.81411	19.9148	1.02091	2.38244	0.0001	0.00135054	MOSC domain-containing protein, mitochondrial precursor, putative, expressed
LOC_Os02g49840	Chr2:30456665-30462759	2.19866	4.45654	1.0193	1.65477	0.0067	0.0400118	OsMADS57 - MADS-box family gene with MIKCc type-box, expressed
LOC_Os01g07940	Chr1:3835128-3838211	1.83311	3.71406	1.0187	1.91325	0.00395	0.0271349	AGC_PVPK_like_kin82y.3 - ACG kinases include homologs to PKA, PKG and PKC, expressed
LOC_Os01g65400	Chr1:37955087-37959001	5.13834	10.4038	1.01774	1.95792	0.00135	0.0117355	DNA polymerase I, putative, expressed
LOC_Os08g41690	Chr8:26314754-26317837	1.97676	3.99923	1.01658	1.84873	0.00185	0.0150851	expressed protein
LOC_Os01g17396	Chr1:10008035-10011595	2.32559	4.70197	1.01567	1.71747	0.00365	0.0254858	expressed protein
LOC_Os10g25210	Chr10:13015119-13017947	10.756	21.7364	1.01496	2.78982	5e-05	0.00072992	OsFBX384 - F-box domain containing protein, expressed
LOC_Os05g22730	Chr5:12895900-12896888	9.24286	18.6665	1.01404	1.89229	0.00205	0.01633	expressed protein
LOC_Os10g22890	Chr10:11893674-11899916	1.05872	2.13663	1.01302	1.78255	0.0036	0.0252477	receptor-like kinase, putative, expressed
LOC_Os09g09790	Chr9:5306895-5309061	4.28371	8.63792	1.01182	2.19704	0.0002	0.00243581	Fe-S metabolism associated domain containing protein, expressed
LOC_Os04g45160	Chr4:26695623-26700535	6.94094	13.994	1.0116	2.51591	5e-05	0.00072992	DTA2, putative, expressed
LOC_Os02g38210	Chr2:23111936-23113929	22.7228	45.8086	1.01148	2.86773	5e-05	0.00072992	elongation factor Tu, putative, expressed
LOC_Os01g07500	Chr1:3577465-3581859	15.2894	30.8151	1.0111	3.19972	5e-05	0.00072992	alliin lyase precursor, putative, expressed
LOC_Os05g39690	Chr5:23297456-23300472	3.70489	7.45967	1.00968	1.86532	0.00265	0.0199294	oxidoreductase, aldo/keto reductase family protein, putative, expressed
LOC_Os05g09728	Chr5:5511878-5512895	6.62058	13.3293	1.00957	2.11127	0.0032	0.0230815	expressed protein
LOC_Os08g41320	Chr8:26102848-26105371	10.5768	21.2855	1.00897	2.72161	5e-05	0.00072992	BHLH transcription factor, putative, expressed
LOC_Os01g66600	Chr1:38684422-38688097	3.76362	7.57176	1.00851	1.88795	0.0024	0.0184335	rhodanese-like, putative, expressed
LOC_Os03g19420	Chr3:10926468-10927950	98.1899	197.453	1.00786	3.23899	0.00015	0.00189973	nicotianamine synthase, putative, expressed
LOC_Os05g32710	Chr5:19154969-19157600	3.52324	7.08374	1.00761	2.1949	0.00015	0.00189973	Alpha amylase, catalytic domain containing protein, expressed
LOC_Os07g33660	Chr7:20113508-20115204	9.44675	18.9896	1.00732	2.11222	0.00125	0.0110436	expressed protein
LOC_Os12g27335	Chr12:16061380-16061989	8.55544	17.1968	1.00723	1.65522	0.0076	0.0439	expressed protein
LOC_Os01g50680	Chr1:29104883-29109135	3.17226	6.3689	1.00553	1.82982	0.0027	0.0201843	OsSub2 - Putative Subtilisin homologue, expressed
LOC_Os12g30040	Chr12:17979096-17983355	1.78456	3.58277	1.0055	1.69535	0.0051	0.032634	transmembrane amino acid transporter protein, putative, expressed
LOC_Os01g10440	Chr1:5507001-5509548	16.9754	34.0727	1.00517	3.25022	5e-05	0.00072992	xylosyltransferase, putative, expressed
LOC_Os04g24140	Chr4:13802275-13803543	57.3101	114.979	1.0045	3.48799	5e-05	0.00072992	ribose-5-phosphate isomerase A, putative, expressed
LOC_Os02g57250	Chr2:35073370-35075801	23.5993	47.341	1.00434	2.87226	5e-05	0.00072992	OsIAA10 - Auxin-responsive Aux/IAA gene family member, expressed
LOC_Os10g38470	Chr10:20551208-20552421	16.3112	32.703	1.00356	2.80389	0.0001	0.00135054	glutathione S-transferase, putative, expressed
LOC_Os05g35580	Chr5:21141375-21143534	13.6163	27.2943	1.00326	3.16051	5e-05	0.00072992	amidophosphoribosyltransferase, chloroplast precursor, putative, expressed
LOC_Os10g41940	Chr10:22558345-22561885	33.5329	67.1675	1.00219	2.72306	5e-05	0.00072992	expressed protein
LOC_Os04g24328	Chr4:13937942-13939152	68.4142	137.026	1.00208	2.49844	5e-05	0.00072992	jasmonate-induced protein, putative, expressed
LOC_Os04g38750	Chr4:23027338-23029083	13.7867	27.5819	1.00045	2.25012	5e-05	0.00072992	plastid-specific 30S ribosomal protein 3, chloroplast precursor, putative, expressed
LOC_Os05g15160	Chr5:8600455-8609826	3.47934	6.96	1.00027	1.77233	0.0031	0.0224896	phosphate/phosphate translocator, putative, expressed
LOC_Os03g44250	Chr3:24865499-24866348	5.28639	10.5744	1.00022	1.71096	0.0046	0.0302558	expressed protein
LOC_Os02g35940	Chr2:21587766-21589074	17.3795	34.7512	0.999673	3.42275	0.0001	0.00135054	gibberellin receptor GID1L2, putative, expressed
LOC_Os05g04450	Chr5:2050493-2052108	23.6621	47.2871	0.998871	3.30135	5e-05	0.00072992	peroxidase precursor, putative, expressed
LOC_Os10g34795	Chr10:18579904-18580742	19.1192	38.1776	0.997706	2.41227	0.00015	0.00189973	expressed protein
LOC_Os01g73900	Chr1:42821163-42825125	11.5464	23.0519	0.997445	2.63573	5e-05	0.00072992	DEAD-box ATP-dependent RNA helicase, putative, expressed
LOC_Os04g58780	Chr4:34958611-34970112	2.42985	4.84964	0.997012	2.22786	0.00025	0.00295117	pentatricopeptide repeat protein, putative, expressed
LOC_Os03g17780	Chr3:9893420-9896633	4.48527	8.95017	0.99672	2.20679	0.0003	0.00344573	WD domain, G-beta repeat domain containing protein, expressed
LOC_Os02g12030	Chr2:6247082-6250599	0.939863	1.87528	0.996581	1.61775	0.0083	0.0467747	receptor-like protein kinase precursor, putative, expressed
LOC_Os01g35030	Chr1:19378168-19387198	1.01008	2.01444	0.995913	1.8058	0.005	0.0321583	MDR-like ABC transporter, putative, expressed
LOC_Os08g27150	Chr8:16582625-16586421	1.15071	2.29389	0.995268	1.70011	0.0047	0.0307268	chloroplastic group IIA intron splicing facilitator CRS1, chloroplast precursor, putative, expressed
LOC_Os09g25934	Chr9:15572920-15580902	10.5303	20.9816	0.994583	2.29267	0.00015	0.00189973	expressed protein
LOC_Os12g38880	Chr12:23912104-23914774	2.82187	5.61824	0.993467	2.1146	0.00075	0.00738829	tetratricopeptide-like helical, putative, expressed
LOC_Os01g62860	Chr1:36403441-36407380	6.41251	12.7645	0.99317	2.10291	0.0008	0.00773994	oxidoreductase, aldo/keto reductase family protein, putative, expressed
LOC_Os04g56950	Chr4:33950220-33952563	7.61221	15.1515	0.993074	2.41527	0.0004	0.0043648	jasmonate O-methyltransferase, putative, expressed
LOC_Os01g20930	Chr1:11688900-11690975	6.69244	13.2993	0.990749	1.86328	0.00875	0.0486429	RING-H2 finger protein, putative, expressed
LOC_Os11g09020	Chr11:4799113-4801313	6.20152	12.3196	0.990266	1.97748	0.00035	0.00391428	amino acid transporter, putative, expressed
LOC_Os09g32030	Chr9:19119276-19121242	5.29933	10.5216	0.989465	1.8749	0.0018	0.0147583	expressed protein
LOC_Os01g48690	Chr1:27922229-27924368	13.7889	27.3454	0.987791	2.2965	0.0001	0.00135054	ribosomal protein rpS20, putative, expressed
LOC_Os03g60840	Chr3:34566987-34568087	42.4345	84.1527	0.987773	2.97331	5e-05	0.00072992	BBTI13 - Bowman-Birk type bran trypsin inhibitor precursor, expressed
LOC_Os02g36570	Chr2:22077488-22085283	6.47951	12.8464	0.987405	2.56071	5e-05	0.00072992	ABC1 family domain containing protein, putative, expressed
LOC_Os03g51840	Chr3:29730343-29732399	2.39414	4.74607	0.987224	1.86713	0.0027	0.0201843	PPR repeat containing protein, expressed
LOC_Os05g46770	Chr5:27085231-27089314	5.6399	11.1775	0.98686	2.57101	5e-05	0.00072992	expressed protein
LOC_Os08g41440	Chr8:26165008-26167022	6.80648	13.4884	0.986743	2.73774	0.0003	0.00344573	UDP-glucuronate 4-epimerase, putative, expressed
LOC_Os08g05780	Chr8:3093747-3094879	6.3949	12.6695	0.986371	2.2242	0.00465	0.0304668	expressed protein
LOC_Os04g58410	Chr4:34751497-34756079	4.21407	8.33593	0.98413	2.15953	0.00015	0.00189973	smr domain containing protein, expressed
LOC_Os11g14300	Chr11:8018355-8026673	21.4141	42.3398	0.983454	2.8362	5e-05	0.00072992	la domain containing protein, expressed
LOC_Os06g46900	Chr6:28463763-28466297	11.7892	23.3076	0.983336	2.42907	5e-05	0.00072992	phosphosulfolactate synthase-related protein, putative, expressed
LOC_Os02g50010	Chr2:30557557-30560966	5.10927	10.0987	0.982987	2.26969	0.00015	0.00189973	APO, putative, expressed
LOC_Os10g31530	Chr10:16515840-16516711	8.46492	16.7312	0.982977	1.69616	0.00465	0.0304668	glycine-rich cell wall protein, putative, expressed
LOC_Os06g13660	Chr6:7574977-7581553	2.81547	5.56271	0.982414	2.29562	5e-05	0.00072992	alanyl-tRNA synthetase, putative, expressed
LOC_Os09g25770	Chr9:15447548-15450012	64.584	127.443	0.980609	2.95238	5e-05	0.00072992	auxin-induced protein 5NG4, putative, expressed
LOC_Os01g23710	Chr1:13342878-13345906	1.81486	3.58112	0.980555	1.81228	0.00475	0.0309602	no apical meristem protein, putative, expressed
LOC_Os07g05820	Chr7:2797690-2801364	10.1006	19.9267	0.980256	2.29558	5e-05	0.00072992	hydroxyacid oxidase 1, putative, expressed
LOC_Os05g01750	Chr5:446348-453210	10.5792	20.8612	0.979597	2.45577	5e-05	0.00072992	TruB family pseudouridylate synthase, putative, expressed
LOC_Os11g04409	Chr11:1835450-1837930	68.3375	134.729	0.979311	3.01171	5e-05	0.00072992	expressed protein
LOC_Os06g01920	Chr6:511854-512804	8.26449	16.2911	0.979084	2.0016	0.00595	0.0366166	expansin precursor, putative, expressed
LOC_Os10g42240	Chr10:22750203-22753105	8.19296	16.1477	0.978874	2.37119	5e-05	0.00072992	kinase, pfkB family, putative, expressed
LOC_Os08g07550	Chr8:4242934-4243883	8.19198	16.1381	0.978186	1.87741	0.0025	0.0190176	hAT dimerisation domain-containing protein, putative, expressed
LOC_Os01g68770	Chr1:39948061-39951534	91.9896	181.204	0.978076	2.88454	5e-05	0.00072992	selenium-binding protein, putative, expressed
LOC_Os04g05650	Chr4:2890371-2891360	41.6702	82.0825	0.978058	2.45855	5e-05	0.00072992	expressed protein
LOC_Os11g20179	Chr11:11666320-11668718	13.5823	26.7352	0.97701	2.33088	0.0003	0.00344573	expressed protein
LOC_Os07g42910	Chr7:25691833-25694745	4.52876	8.90264	0.975118	1.69218	0.0048	0.0311836	cytochrome c oxidase subunit, putative, expressed
LOC_Os02g51930	Chr2:31805976-31807891	100.231	197.013	0.974962	3.12136	5e-05	0.00072992	cytokinin-O-glucosyltransferase 2, putative, expressed
LOC_Os08g42920	Chr8:27127759-27129724	33.7005	66.2232	0.974568	2.82691	5e-05	0.00072992	60S ribosomal protein L7, putative, expressed
LOC_Os04g12980	Chr4:7163747-7166406	19.7382	38.7844	0.974489	2.78867	5e-05	0.00072992	UDP-glucoronosyl/UDP-glucosyl transferase, putative, expressed
LOC_Os05g48800	Chr5:27967560-27971088	102.806	201.949	0.974065	2.87325	5e-05	0.00072992	drought induced 19 protein, putative, expressed
LOC_Os04g44410	Chr4:26287756-26292362	3.64219	7.15155	0.97345	1.87821	0.0044	0.0292719	OsSCP25 - Putative Serine Carboxypeptidase homologue, expressed
LOC_Os07g49110	Chr7:29392446-29401913	12.7661	25.0602	0.97308	2.8944	5e-05	0.00072992	D-alanine--D-alanine ligase family, putative, expressed
LOC_Os03g62510	Chr3:35392929-35398117	3.47859	6.8278	0.972917	2.00093	0.00115	0.0103875	amine oxidase, flavin-containing, domain containing protein, expressed
LOC_Os02g15900	Chr2:9005186-9007486	11.6514	22.8692	0.972904	2.25899	0.00015	0.00189973	50S ribosomal protein L21, chloroplast precursor, putative, expressed
LOC_Os07g47590	Chr7:28452721-28456569	23.631	46.3769	0.972724	2.75979	5e-05	0.00072992	expressed protein
LOC_Os09g20420	Chr9:12284152-12285435	5.8273	11.4289	0.971788	2.29223	0.0009	0.00853065	expressed protein
LOC_Os04g28470	Chr4:16860379-16862551	2.1492	4.21087	0.970318	1.69861	0.0036	0.0252477	retrotransposon protein, putative, unclassified, expressed
LOC_Os03g24860	Chr3:14153871-14159202	3.75962	7.36583	0.970264	1.82962	0.0027	0.0201843	transporter family protein, putative, expressed
LOC_Os08g42720	Chr8:27027582-27032155	5.19274	10.1736	0.970263	2.05807	0.00035	0.00391428	solute carrier family 35 member F1, putative, expressed
LOC_Os04g46810	Chr4:27740049-27740811	35.925	70.3395	0.969346	2.49744	5e-05	0.00072992	LTPL120 - Protease inhibitor/seed storage/LTP family protein precursor, expressed
LOC_Os04g36610	Chr4:22081904-22084258	2.95206	5.77893	0.969081	1.63118	0.00905	0.0498451	endoglucanase, putative, expressed
LOC_Os01g68070	Chr1:39577047-39580186	1.93855	3.79237	0.968122	1.84361	0.0028	0.0207301	PPR repeat containing protein, expressed
LOC_Os06g04350	Chr6:1849922-1853898	2.80481	5.48443	0.967439	1.71864	0.0054	0.0340684	expressed protein
LOC_Os06g51290	Chr6:31051970-31055926	6.66862	13.0374	0.967194	2.27586	0.00015	0.00189973	phytoene synthase, chloroplast precursor, putative, expressed
LOC_Os01g72240	Chr1:41887066-41890850	22.232	43.4082	0.965329	2.83531	5e-05	0.00072992	uridine 5-monophosphate synthase, putative, expressed
LOC_Os02g39790	Chr2:24045243-24049190	105.541	206.018	0.964964	2.81854	5e-05	0.00072992	CPuORF9 - conserved peptide uORF-containing transcript, expressed
LOC_Os10g41580	Chr10:22373185-22375105	8.75524	17.0868	0.96466	2.65761	0.00015	0.00189973	protein binding protein, putative, expressed
LOC_Os10g27280	Chr10:14399007-14400695	16.7351	32.6526	0.964319	2.59844	0.0001	0.00135054	thaumatin, putative, expressed
LOC_Os08g44650	Chr8:28074868-28077136	9.31175	18.1568	0.963382	2.08068	0.00045	0.00480686	expressed protein
LOC_Os03g45280	Chr3:25563652-25564577	65.2749	127.028	0.960545	2.81508	5e-05	0.00072992	dehydrin, putative, expressed
LOC_Os08g38570	Chr8:24384369-24389116	6.71267	13.0561	0.959764	2.5576	5e-05	0.00072992	WD domain, G-beta repeat domain containing protein, expressed
LOC_Os11g05552	Chr11:2512382-2517219	2.78101	5.40704	0.959229	2.04651	0.00075	0.00738829	signal recognition particle 54 kDa protein, chloroplast precursor, putative, expressed
LOC_Os11g10760	Chr11:5907949-5919029	4.69408	9.1228	0.958635	2.1533	0.0004	0.0043648	NBS-LRR disease resistance protein, putative, expressed
LOC_Os02g11740	Chr2:6057099-6060286	52.422	101.829	0.957899	2.89499	5e-05	0.00072992	plastidic ATP/ADP-transporter, putative, expressed
LOC_Os01g64470	Chr1:37411999-37413011	15.0281	29.1864	0.95763	2.28264	0.0005	0.0052468	harpin-induced protein 1 domain containing protein, expressed
LOC_Os05g46040	Chr5:26705163-26707820	23.813	46.1937	0.955946	2.65001	5e-05	0.00072992	protein phosphatase 2C, putative, expressed
LOC_Os06g08110	Chr6:3934026-3937229	7.99755	15.5088	0.955461	2.34403	5e-05	0.00072992	nodulin, putative, expressed
LOC_Os06g29180	Chr6:16649543-16653296	59.1272	114.621	0.954979	2.89962	5e-05	0.00072992	erythronate-4-phosphate dehydrogenase domain containing protein, expressed
LOC_Os08g07430	Chr8:4172145-4175556	7.72309	14.9706	0.954884	2.19398	0.0002	0.00243581	expressed protein
LOC_Os01g15900	Chr1:8949248-8952712	5.67433	10.9882	0.953429	2.33075	5e-05	0.00072992	expressed protein
LOC_Os07g09970	Chr7:5313787-5318164	32.7357	63.3758	0.953065	2.73858	0.0001	0.00135054	LTPL84 - Protease inhibitor/seed storage/LTP family protein precursor, expressed
LOC_Os02g26700	Chr2:15676222-15679689	204.222	395.116	0.952136	2.47934	5e-05	0.00072992	cation transport regulator-like protein 1, putative, expressed
LOC_Os12g17910	Chr12:10293566-10297912	25.4737	49.2028	0.949732	2.78446	5e-05	0.00072992	T-complex protein, putative, expressed
LOC_Os01g03870	Chr1:1641233-1644237	3.45195	6.66534	0.949268	2.12302	0.0005	0.0052468	expressed protein
LOC_Os06g49640	Chr6:30034711-30037742	15.3274	29.5903	0.949009	2.45086	5e-05	0.00072992	uncharacterized UPF0114 domain containing protein, expressed
LOC_Os01g50616	Chr1:29066656-29072196	2.69728	5.20092	0.947261	2.064	0.0014	0.0120995	phosphatidylinositol transfer, putative, expressed
LOC_Os01g48930	Chr1:28080391-28083388	152.413	293.759	0.946644	2.67036	5e-05	0.00072992	splicing factor-related, putative, expressed
LOC_Os02g39410	Chr2:23776247-23782298	2.88243	5.55373	0.946171	1.92016	0.001	0.00925019	protein phosphatase 2C, putative, expressed
LOC_Os04g58840	Chr4:34997070-34999168	7.19492	13.862	0.94608	2.60159	0.0004	0.0043648	Eukaryotic aspartyl protease domain containing protein, expressed
LOC_Os06g38680	Chr6:22967815-22971851	2.53471	4.88197	0.945642	2.2006	0.00035	0.00391428	expressed protein
LOC_Os07g43950	Chr7:26265493-26268673	19.1952	36.9573	0.945118	2.47471	5e-05	0.00072992	RNA recognition motif containing protein, putative, expressed
LOC_Os01g09460	Chr1:4820103-4823129	4.14556	7.97651	0.944189	2.0722	0.0008	0.00773994	hexokinase, putative, expressed
LOC_Os03g17910	Chr3:9978905-9981030	25.8921	49.8061	0.943807	2.64076	5e-05	0.00072992	kinesin like protein, putative, expressed
LOC_Os10g42130	Chr10:22669291-22671877	4.99255	9.59513	0.942527	1.90523	0.0017	0.0141133	no apical meristem protein, putative, expressed
LOC_Os04g39350	Chr4:23422506-23423339	6.9267	13.3123	0.942523	1.55365	0.009	0.0496501	heavy metal associated domain containing protein, expressed
LOC_Os09g30350	Chr9:18469701-18474199	19.2987	37.0869	0.942403	2.6771	5e-05	0.00072992	expressed protein
LOC_Os04g25990	Chr4:15122938-15126278	6.09409	11.7105	0.942317	2.00439	0.00105	0.0096341	tRNA methyltransferase complex GCD14 subunit, putative, expressed
LOC_Os07g45620	Chr7:27233091-27243299	0.735481	1.41305	0.942051	1.6181	0.00565	0.0351887	retrotransposon protein, putative, Ty3-gypsy subclass, expressed
LOC_Os08g33140	Chr8:20591458-20596596	2.71696	5.21491	0.940651	1.64624	0.0062	0.037784	F-box domain containing protein, expressed
LOC_Os04g02120	Chr4:692759-695278	3.22038	6.18019	0.94042	1.93283	0.0012	0.0107172	expressed protein
LOC_Os03g55080	Chr3:31323189-31326926	7.80919	14.9844	0.940222	2.34472	0.00125	0.0110436	WRKY3, expressed
LOC_Os06g49505	Chr6:29988039-29989101	45.9706	88.2068	0.940178	3.05352	5e-05	0.00072992	arogenate dehydrogenase 1, chloroplast precursor, putative, expressed
LOC_Os03g24020	Chr3:13627560-13630342	8.20596	15.7388	0.939582	1.99912	0.00095	0.00888084	ribosomal protein L6, putative, expressed
LOC_Os09g26610	Chr9:16143734-16144535	10.1502	19.4665	0.93949	1.90003	0.0016	0.013514	OsSAUR38 - Auxin-responsive SAUR gene family member, expressed
LOC_Os02g47310	Chr2:28893960-28897548	22.8388	43.7956	0.9393	2.68601	0.0001	0.00135054	Cyclopropane-fatty-acyl-phospholipid synthase, putative, expressed
LOC_Os05g09400	Chr5:5274198-5277765	12.5971	24.1519	0.939043	1.76854	0.0041	0.0278678	30S ribosomal protein S31, chloroplast precursor, putative, expressed
LOC_Os06g02340	Chr6:779994-782325	6.54097	12.5328	0.938127	2.0428	0.00035	0.00391428	OsFBX183 - F-box domain containing protein, expressed
LOC_Os08g42320	Chr8:26713273-26716439	7.68418	14.7135	0.93718	2.47656	5e-05	0.00072992	expressed protein
LOC_Os07g06850	Chr7:3344779-3346557	9.24791	17.692	0.935901	2.37798	0.0002	0.00243581	gibberellin receptor GID1L2, putative, expressed
LOC_Os01g71060	Chr1:41126093-41127677	9.89417	18.9267	0.93577	2.35375	0.0002	0.00243581	xylanase inhibitor, putative, expressed
LOC_Os06g20879	Chr6:12062650-12065347	2.25102	4.30275	0.934681	1.62606	0.00625	0.0379914	expressed protein
LOC_Os01g74490	Chr1:43141840-43142670	28.4083	54.2872	0.934299	2.39621	5e-05	0.00072992	heavy metal-associated domain containing protein, expressed
LOC_Os09g24954	Chr9:14896146-14901415	9.12318	17.4238	0.933448	1.99919	0.00055	0.00566905	double-stranded RNA binding motif containing protein, expressed
LOC_Os11g15250	Chr11:8612738-8613124	118.842	226.966	0.933434	2.15784	0.0003	0.00344573	THION31 - Plant thionin family protein precursor, expressed
LOC_Os05g32220	Chr5:18789635-18793774	24.5467	46.8562	0.932711	2.62445	5e-05	0.00072992	L1P family of ribosomal proteins domain containing protein, expressed
LOC_Os09g15810	Chr9:9652177-9654972	15.0733	28.7712	0.932633	2.45783	5e-05	0.00072992	bifunctional protein folD, putative, expressed
LOC_Os10g23050	Chr10:12015872-12017745	7.70022	14.6919	0.932046	2.3235	0.00085	0.00814427	helix-loop-helix DNA-binding protein, putative, expressed
LOC_Os01g03360	Chr1:1353628-1354802	366.631	698.835	0.930624	2.67443	5e-05	0.00072992	BBTI5 - Bowman-Birk type bran trypsin inhibitor precursor, expressed
LOC_Os03g31706	Chr3:18110003-18112658	12.6052	24.0252	0.930535	2.30096	0.0001	0.00135054	expressed protein
LOC_Os03g48820	Chr3:27815934-27817170	3.24998	6.19395	0.930431	1.85734	0.0085	0.04762	expressed protein
LOC_Os01g59980	Chr1:34677990-34682230	6.92128	13.1894	0.93027	2.56859	5e-05	0.00072992	zinc finger family protein, putative, expressed
LOC_Os03g10180	Chr3:5161509-5166769	8.51245	16.2168	0.929838	2.5723	5e-05	0.00072992	expressed protein
LOC_Os10g39000	Chr10:20786436-20787842	4.12154	7.85066	0.929628	1.75965	0.00885	0.0490842	expressed protein
LOC_Os05g04830	Chr5:2325837-2328042	3.21015	6.11203	0.929013	1.62892	0.00755	0.043696	expressed protein
LOC_Os01g07950	Chr1:3842752-3845541	30.4051	57.874	0.928603	2.54309	5e-05	0.00072992	OsGrx_S15.2 - glutaredoxin subgroup II, expressed
LOC_Os03g15890	Chr3:8767517-8770548	19.6844	37.439	0.927489	2.54331	5e-05	0.00072992	RNA recognition motif containing protein, expressed
LOC_Os07g09800	Chr7:5216003-5217096	3.89205	7.4024	0.927464	1.5781	0.00815	0.0461917	expressed protein
LOC_Os02g33610	Chr2:20005952-20013852	8.65305	16.4528	0.927053	2.6899	5e-05	0.00072992	metallo-beta-lactamase, putative, expressed
LOC_Os05g33290	Chr5:19509972-19514162	9.17717	17.4421	0.926455	2.10203	0.0003	0.00344573	uncharacterized conserved membrane protein specific to cyanobacteria, putative, expressed
LOC_Os08g01150	Chr8:102126-107380	32.767	62.2637	0.926149	2.90466	5e-05	0.00072992	DTA2, putative, expressed
LOC_Os07g08160	Chr7:4145911-4146866	38.7657	73.6486	0.925876	2.14559	5e-05	0.00072992	early light-induced protein, chloroplast precursor, putative, expressed
LOC_Os06g48020	Chr6:29035685-29038299	3.75601	7.1326	0.925228	1.79545	0.00765	0.0440926	peroxidase precursor, putative, expressed
LOC_Os03g11960	Chr3:6271894-6275728	77.0145	146.193	0.924667	1.84324	0.0022	0.0172309	copper/zinc superoxide dismutase, putative, expressed
LOC_Os11g43600	Chr11:26306074-26310454	3.26959	6.20471	0.924253	1.83612	0.003	0.021911	peptide chain release factor protein, putative, expressed
LOC_Os01g64620	Chr1:37505154-37506089	71.419	135.461	0.923502	3.25698	5e-05	0.00072992	zinc finger, C3HC4 type domain containing protein, expressed
LOC_Os03g24040	Chr3:13633728-13637491	15.448	29.2948	0.923231	2.41898	5e-05	0.00072992	seven in absentia protein family domain containing protein, expressed
LOC_Os07g48460	Chr7:28992713-28994935	64.3164	121.817	0.921451	2.80723	5e-05	0.00072992	stress responsive protein, putative, expressed
LOC_Os03g14010	Chr3:7599685-7603064	9.25418	17.511	0.920083	2.35533	5e-05	0.00072992	glycosyl hydrolase family 10 protein, putative, expressed
LOC_Os09g30418	Chr9:18533842-18541109	301.599	570.404	0.919351	2.02959	0.0008	0.00773994	heat shock protein, putative, expressed
LOC_Os03g43430	Chr3:24220020-24222271	15.5421	29.3894	0.919115	2.09554	0.00095	0.00888084	mttA/Hcf106 family protein, putative, expressed
LOC_Os08g40680	Chr8:25758850-25759949	8.77655	16.5934	0.918882	2.09254	0.00255	0.0193238	glycosyl hydrolase, putative, expressed
LOC_Os04g51792	Chr4:30688096-30689790	6.92685	13.0838	0.917509	1.73223	0.00335	0.0239171	PAP fibrillin family domain containing protein, expressed
LOC_Os07g02910	Chr7:1087387-1089210	4.03491	7.62106	0.917456	1.66425	0.0065	0.0391216	OsFBL33 - F-box domain and LRR containing protein, expressed
LOC_Os01g08510	Chr1:4208552-4213302	2.44459	4.61726	0.917442	2.04929	0.00065	0.00656619	MAR-binding filament-like protein 1, putative, expressed
LOC_Os12g04204	Chr12:1772556-1774719	125.751	237.401	0.916758	2.70852	5e-05	0.00072992	expressed protein
LOC_Os05g36310	Chr5:21509381-21510614	21.7291	41.0188	0.91666	2.78252	0.0001	0.00135054	zinc finger, C3HC4 type domain containing protein, expressed
LOC_Os01g01670	Chr1:330237-332345	9.34893	17.6468	0.916529	2.10771	0.0005	0.0052468	expressed protein
LOC_Os02g09390	Chr2:4824245-4825855	5.72122	10.7986	0.91645	2.07162	0.0025	0.0190176	cytochrome P450, putative, expressed
LOC_Os03g55350	Chr3:31487939-31490885	20.5034	38.6844	0.915891	3.3548	5e-05	0.00072992	OsSub31 - Putative Subtilisin homologue, expressed
LOC_Os02g49720	Chr2:30392546-30396775	17.2331	32.5077	0.915601	3.01062	5e-05	0.00072992	aldehyde dehydrogenase, putative, expressed
LOC_Os07g09420	Chr7:4969372-4971156	54.3275	102.37	0.914034	3.29627	5e-05	0.00072992	ATPase, putative, expressed
LOC_Os11g10480	Chr11:5712640-5716288	25.2742	47.5796	0.91268	2.58635	5e-05	0.00072992	dehydrogenase, putative, expressed
LOC_Os01g29830	Chr1:16716654-16719424	9.74178	18.3305	0.911993	2.19892	0.00035	0.00391428	expressed protein
LOC_Os01g37870	Chr1:21195397-21202961	3.90058	7.33825	0.911749	2.13805	0.0004	0.0043648	PPR repeat domain containing protein, putative, expressed
LOC_Os10g33270	Chr10:17471598-17474854	60.4777	113.761	0.911525	2.66219	5e-05	0.00072992	cyanate hydratase, putative, expressed
LOC_Os01g70950	Chr1:41061090-41070764	10.9889	20.6596	0.910759	2.08939	0.001	0.00925019	spermatogenesis-associated protein 20 precursor, putative, expressed
LOC_Os02g42960	Chr2:25855531-25859143	6.13634	11.5244	0.909237	1.83435	0.0016	0.013514	thylakoid lumenal protein, putative, expressed
LOC_Os01g06680	Chr1:3147378-3152501	2.08626	3.91737	0.908969	1.78087	0.0023	0.017873	retrotransposon protein, putative, unclassified, expressed
LOC_Os01g39680	Chr1:22379058-22383049	3.55149	6.6684	0.908917	1.61468	0.00725	0.0423717	expressed protein
LOC_Os04g39420	Chr4:23463356-23465733	11.4574	21.5079	0.90859	2.37118	5e-05	0.00072992	6-phosphofructokinase 2, putative, expressed
LOC_Os01g68650	Chr1:39866337-39867460	36.8078	69.082	0.908298	3.03182	5e-05	0.00072992	plant-specific domain TIGR01615 family protein, expressed
LOC_Os03g55970	Chr3:31860448-31863401	6.89261	12.9321	0.90783	2.23846	0.0001	0.00135054	uncharacterized protein ycf44, putative, expressed
LOC_Os05g04340	Chr5:1965595-1977874	32.4947	60.9663	0.907808	2.20119	0.00015	0.00189973	CGMC_GSK.6 - CGMC includes CDA, MAPK, GSK3, and CLKC kinases, expressed
LOC_Os10g39920	Chr10:21360017-21361057	8.62823	16.182	0.907252	1.93669	0.00255	0.0193238	expressed protein
LOC_Os12g05880	Chr12:2699174-2700272	9.36902	17.5707	0.9072	1.97827	0.0014	0.0120995	Cupin domain containing protein, expressed
LOC_Os12g07580	Chr12:3789861-3790727	12.6002	23.6176	0.906408	1.90186	0.0021	0.0166061	dirigent, putative, expressed
LOC_Os09g17580	Chr9:10751517-10752326	7.09061	13.2887	0.906215	1.70845	0.0069	0.0408679	expressed protein
LOC_Os03g53300	Chr3:30593464-30596059	12.2681	22.9911	0.906159	2.19251	0.00025	0.00295117	expressed protein
LOC_Os03g19330	Chr3:10864692-10866273	4.63705	8.68976	0.906111	1.94244	0.0049	0.0317208	glycosyltransferase, putative, expressed
LOC_Os02g36190	Chr2:21810333-21813460	3.60582	6.75704	0.906063	1.55001	0.00465	0.0304668	cytochrome P450, putative, expressed
LOC_Os03g15780	Chr3:8702787-8707794	21.7212	40.6873	0.905472	2.5663	5e-05	0.00072992	anthranilate synthase component I-1, chloroplast precursor, putative, expressed
LOC_Os04g01540	Chr4:370769-372421	16.8271	31.5069	0.904883	2.25578	0.0001	0.00135054	expressed protein
LOC_Os11g29780	Chr11:17284027-17285405	7.64771	14.3019	0.903104	2.39828	0.00195	0.0157495	plant-specific domain TIGR01627 family protein, expressed
LOC_Os05g18660	Chr5:10804137-10807183	15.7453	29.4445	0.903075	2.49097	5e-05	0.00072992	OsFBDUF24 - F-box and DUF domain containing protein, expressed
LOC_Os03g52640	Chr3:30188187-30191568	4.40523	8.23661	0.902833	1.7573	0.00385	0.0265706	expressed protein
LOC_Os08g09250	Chr8:5373215-5377152	301.973	564.596	0.902798	2.42497	0.0001	0.00135054	glyoxalase family protein, putative, expressed
LOC_Os03g62280	Chr3:35284997-35287389	56.9676	106.497	0.902594	2.51349	5e-05	0.00072992	expressed protein
LOC_Os03g04169	Chr3:1909200-1919541	28.5298	53.3284	0.902432	2.67255	5e-05	0.00072992	ATP phosphoribosyltransferase, putative, expressed
LOC_Os11g32780	Chr11:19362541-19366156	5.72092	10.6933	0.902392	1.69766	0.00485	0.0314741	expressed protein
LOC_Os09g36130	Chr9:20799134-20802933	2.65301	4.9553	0.901343	1.61571	0.00805	0.0457448	expressed protein
LOC_Os04g19740	Chr4:11026652-11032683	10.0831	18.8294	0.901055	2.49451	5e-05	0.00072992	transketolase, chloroplast precursor, putative, expressed
LOC_Os01g68580	Chr1:39836638-39837257	25.4592	47.53	0.90065	2.02298	0.0019	0.0154399	LTPL38 - Protease inhibitor/seed storage/LTP family protein precursor, expressed
LOC_Os03g07300	Chr3:3713490-3721105	15.4533	28.839	0.900105	2.31148	5e-05	0.00072992	ribulose-phosphate 3-epimerase, chloroplast precursor, putative, expressed
LOC_Os03g57660	Chr3:32859059-32866608	7.95252	14.8382	0.899832	2.36533	5e-05	0.00072992	peptidase, putative, expressed
LOC_Os08g41990	Chr8:26531390-26534074	26.4523	49.3281	0.899016	2.52391	5e-05	0.00072992	aminotransferase, putative, expressed
LOC_Os08g33390	Chr8:20820887-20824910	22.0144	41.0462	0.898804	2.60865	5e-05	0.00072992	Regulator of chromosome condensation domain containing protein, expressed
LOC_Os03g21980	Chr3:12591670-12595636	4.03725	7.52733	0.898766	1.97242	0.0013	0.0113923	tRNA pseudouridine synthase family protein, putative, expressed
LOC_Os01g10870	Chr1:5799606-5801142	12.0595	22.4774	0.898309	2.60632	0.0003	0.00344573	CAMK_KIN1/SNF1/Nim1_like.7 - CAMK includes calcium/calmodulin depedent protein kinases, expressed
LOC_Os10g27450	Chr10:14474780-14478810	4.11858	7.67628	0.898259	1.76785	0.00305	0.0221945	tetrapyrrole methylase family protein, putative, expressed
LOC_Os12g01940	Chr12:559261-562829	20.3577	37.923	0.897497	2.49527	0.00015	0.00189973	expressed protein
LOC_Os08g08960	Chr8:5208384-5209569	22.7832	42.4279	0.89704	2.20328	0.0001	0.00135054	Cupin domain containing protein, expressed
LOC_Os06g32020	Chr6:18615682-18616803	483.977	901.049	0.896667	2.43402	5e-05	0.00072992	THION6 - Plant thionin family protein precursor, expressed
LOC_Os02g36210	Chr2:21841058-21847837	5.63932	10.4977	0.896482	1.99967	0.00045	0.00480686	ent-kaurene synthase, chloroplast precursor, putative, expressed
LOC_Os04g53930	Chr4:32137817-32141183	29.4175	54.7371	0.895843	2.89737	5e-05	0.00072992	organic cation transporter protein, putative, expressed
LOC_Os06g10450	Chr6:5374768-5376782	7.30629	13.5783	0.89409	1.82697	0.00475	0.0309602	expressed protein
LOC_Os01g22352	Chr1:12564282-12570032	164.137	304.99	0.893865	2.54733	5e-05	0.00072992	peroxidase precursor, putative, expressed
LOC_Os07g30820	Chr7:18241519-18246940	90.8032	168.601	0.892801	2.70923	5e-05	0.00072992	zinc finger family protein, putative, expressed
LOC_Os02g36110	Chr2:21740303-21742030	10.2829	19.0924	0.892761	2.26438	0.0002	0.00243581	cytochrome P450, putative, expressed
LOC_Os02g51790	Chr2:31719720-31722499	5.0884	9.44673	0.892602	1.97521	0.00135	0.0117355	ribosomal protein L29, putative, expressed
LOC_Os03g05660	Chr3:2822928-2828096	2.90056	5.38385	0.892307	1.75999	0.0041	0.0278678	appr-1-p processing enzyme family protein, putative, expressed
LOC_Os12g05380	Chr12:2433324-2434865	5.82118	10.7952	0.891009	2.07675	0.00235	0.0181608	glycosyltransferase, putative, expressed
LOC_Os02g12010	Chr2:6228455-6231985	1.8318	3.39693	0.890965	1.75146	0.00325	0.0233502	receptor-like protein kinase precursor, putative, expressed
LOC_Os03g04140	Chr3:1892823-1897309	12.5065	23.1899	0.890819	2.36434	5e-05	0.00072992	serine acetyltransferase protein, putative, expressed
LOC_Os01g12580	Chr1:6922081-6923336	4.42325	8.19873	0.890292	1.66868	0.00555	0.0347386	late embryogenesis abundant protein, putative, expressed
LOC_Os03g19560	Chr3:10992828-10997554	8.59872	15.9348	0.889984	2.37971	5e-05	0.00072992	tetratricopeptide repeat domain containing protein, expressed
LOC_Os12g05980	Chr12:2751804-2752653	8.98849	16.655	0.889808	2.02886	0.0044	0.0292719	DUF584 domain containing protein, putative, expressed
LOC_Os01g16950	Chr1:9690234-9692180	26.3948	48.9006	0.889601	3.1899	5e-05	0.00072992	zinc finger, C3HC4 type domain containing protein, expressed
LOC_Os11g37560	Chr11:22175491-22178883	2.29319	4.24658	0.888948	1.69709	0.00285	0.0210349	expressed protein
LOC_Os06g48750	Chr6:29503678-29507318	318.319	588.91	0.887574	2.26424	0.00025	0.00295117	DEAD-box ATP-dependent RNA helicase, putative, expressed
LOC_Os05g48340	Chr5:27712349-27717899	19.6459	36.3052	0.885944	2.60742	5e-05	0.00072992	proteasome-related, putative, expressed
LOC_Os04g52130	Chr4:30961603-30965503	25.042	46.2687	0.88569	2.56176	5e-05	0.00072992	coproporphyrinogen III oxidase, chloroplast precursor, putative, expressed
LOC_Os01g07610	Chr1:3661687-3664319	2.57092	4.75003	0.885652	1.62778	0.0082	0.0463758	PPR repeat domain containing protein, putative, expressed
LOC_Os11g14130	Chr11:7869284-7871990	7.77948	14.3689	0.885207	2.25199	0.0001	0.00135054	mTERF family protein, expressed
LOC_Os02g10600	Chr2:5573181-5578016	5.38144	9.9375	0.884891	2.32941	5e-05	0.00072992	OsFBA1 - F-box and FBA domain containing protein, expressed
LOC_Os04g25410	Chr4:14718531-14722122	27.4301	50.6422	0.88458	2.64399	5e-05	0.00072992	pentatricopeptide repeat domain containing protein, putative, expressed
LOC_Os02g32660	Chr2:19355747-19367127	10.5552	19.4811	0.884126	2.51918	5e-05	0.00072992	1,4-alpha-glucan-branching enzyme, chloroplast precursor, putative, expressed
LOC_Os11g41910	Chr11:25212873-25216758	7.84962	14.4865	0.884018	2.04223	0.00075	0.00738829	GTP-binding protein, putative, expressed
LOC_Os07g01710	Chr7:424869-428523	4.03141	7.43989	0.883998	2.15859	0.0004	0.0043648	phytosulfokine receptor precursor, putative, expressed
LOC_Os07g36250	Chr7:21668219-21671905	2.42674	4.47844	0.883974	1.57125	0.00625	0.0379914	peptide chain release factor protein, putative, expressed
LOC_Os11g47574	Chr11:28749389-28750399	22.6159	41.7358	0.883946	2.35975	0.00015	0.00189973	expressed protein
LOC_Os01g72800	Chr1:42234583-42237458	4.73328	8.72953	0.883063	1.69493	0.0035	0.0247212	signal recognition particle receptor, putative, expressed
LOC_Os01g03530	Chr1:1433032-1436811	5.75587	10.6088	0.882155	2.36634	0.00055	0.00566905	multicopper oxidase domain containing protein, expressed
LOC_Os10g40570	Chr10:21724415-21727181	20.2417	37.3038	0.881993	2.56526	5e-05	0.00072992	flavin-containing monooxygenase family protein, putative, expressed
LOC_Os05g42110	Chr5:24626345-24626852	24.7983	45.6828	0.881412	1.82315	0.00435	0.0291019	allyl alcohol dehydrogenase, putative, expressed
LOC_Os02g26300	Chr2:15447210-15451795	3.87586	7.13143	0.879676	1.93975	0.0011	0.010008	expressed protein
LOC_Os09g29760	Chr9:18091034-18092234	8.34461	15.3353	0.877936	2.3497	0.0034	0.0241943	expressed protein
LOC_Os06g29844	Chr6:17194073-17200583	15.14	27.8164	0.87757	2.42128	0.0001	0.00135054	MATE efflux family protein, putative, expressed
LOC_Os05g01270	Chr5:185621-188487	58.0144	106.552	0.877074	2.55959	5e-05	0.00072992	peptidyl-prolyl cis-trans isomerase, putative, expressed
LOC_Os06g43140	Chr6:25932428-25935032	11.4108	20.952	0.876686	1.83689	0.00145	0.0124502	GA16396-PA, putative, expressed
LOC_Os06g03810	Chr6:1526535-1527625	7.98657	14.6459	0.874852	2.06042	0.00715	0.0420038	expressed protein
LOC_Os05g33510	Chr5:19681731-19684599	32.0544	58.7544	0.874176	2.36915	5e-05	0.00072992	peptide methionine sulfoxide reductase msrB, putative, expressed
LOC_Os04g43710	Chr4:25867806-25869189	8.88643	16.2868	0.874031	2.16667	0.00205	0.01633	CAMK_CAMK_like.3 - CAMK includes calcium/calmodulin depedent protein kinases, expressed
LOC_Os03g09230	Chr3:4820679-4822723	34.7495	63.6266	0.872639	2.57045	0.0001	0.00135054	LTPL69 - Protease inhibitor/seed storage/LTP family protein precursor, expressed
LOC_Os08g25430	Chr8:15476555-15483069	5.62332	10.2909	0.871876	2.10125	0.00075	0.00738829	cysteine-rich receptor-like protein kinase 35 precursor, putative, expressed
LOC_Os04g46630	Chr4:27645594-27647517	36.3079	66.4137	0.871197	2.2862	0.0002	0.00243581	expansin precursor, putative, expressed
LOC_Os02g37070	Chr2:22401333-22402093	7.66652	14.0215	0.870995	1.60326	0.00725	0.0423717	expressed protein
LOC_Os01g22600	Chr1:12704699-12709808	14.3753	26.282	0.87048	2.36502	5e-05	0.00072992	mitochondrial carrier protein, putative, expressed
LOC_Os02g13800	Chr2:7463931-7465506	64.3221	117.523	0.869554	2.83195	5e-05	0.00072992	HSF-type DNA-binding domain containing protein, expressed
LOC_Os03g49720	Chr3:28304984-28307930	10.867	19.8409	0.86852	1.95322	0.00095	0.00888084	PAP fibrillin family domain containing protein, expressed
LOC_Os05g31680	Chr5:18433310-18437696	4.38298	7.98935	0.866165	1.87522	0.00175	0.0144328	expressed protein
LOC_Os05g46520	Chr5:26943379-26945869	39.9427	72.7859	0.865725	2.7996	5e-05	0.00072992	polygalacturonase, putative, expressed
LOC_Os06g27770	Chr6:15724696-15727772	10.3813	18.9063	0.864884	2.16039	0.0005	0.0052468	isoflavone reductase homolog IRL, putative, expressed
LOC_Os03g60260	Chr3:34271315-34273067	33.1662	60.3829	0.864425	3.06439	5e-05	0.00072992	ANT1, putative, expressed
LOC_Os10g22960	Chr10:11947164-11951353	9.14822	16.6502	0.863976	2.15481	0.0006	0.00612607	hydrolase protein, putative, expressed
LOC_Os02g57670	Chr2:35320312-35322987	6.31668	11.492	0.863387	1.70735	0.00465	0.0304668	ribosomal L9, putative, expressed
LOC_Os09g31031	Chr9:18669316-18671727	13.6409	24.803	0.862575	1.88554	0.0011	0.010008	ubiquitin family protein, putative, expressed
LOC_Os10g41560	Chr10:22332955-22339916	31.8885	57.9803	0.862527	2.62604	5e-05	0.00072992	expressed protein
LOC_Os09g28050	Chr9:17024570-17028551	65.9462	119.823	0.861543	2.53639	5e-05	0.00072992	asparate aminotransferase, putative, expressed
LOC_Os08g27030	Chr8:16513725-16517896	5.71641	10.3852	0.861347	1.72359	0.00415	0.0281755	lipid phosphatase protein, putative, expressed
LOC_Os09g08130	Chr9:4201068-4204423	6.31733	11.4742	0.86101	1.80953	0.00355	0.0250075	indole-3-glycerol phosphate synthase, chloroplast precursor, putative, expressed
LOC_Os09g27744	Chr9:16884254-16885576	24.0819	43.7336	0.86079	2.31018	0.00015	0.00189973	expressed protein
LOC_Os04g57400	Chr4:34155423-34158705	50.241	91.1589	0.85952	2.58476	5e-05	0.00072992	methylthioribose kinase, putative, expressed
LOC_Os05g08970	Chr5:4965424-4971029	6.20624	11.2554	0.858833	2.18689	0.00025	0.00295117	SSRP1-like FACT complex subunit, putative, expressed
LOC_Os02g03230	Chr2:1288970-1292421	23.1301	41.92	0.857864	2.5034	5e-05	0.00072992	membrane related protein CP5, putative, expressed
LOC_Os09g36810	Chr9:21230302-21236811	1.53085	2.77417	0.857729	1.60292	0.00585	0.0361319	beta-galactosidase precursor, putative, expressed
LOC_Os01g03390	Chr1:1365507-1366503	514.859	931.959	0.856089	2.29412	0.00015	0.00189973	BBTI7 - Bowman-Birk type bran trypsin inhibitor precursor, expressed
LOC_Os02g02400	Chr2:824849-827644	388.674	703.435	0.855858	2.09197	0.00085	0.00814427	catalase isozyme A, putative, expressed
LOC_Os01g12100	Chr1:6587145-6587940	65.1427	117.892	0.855787	2.09762	0.00025	0.00295117	expressed protein
LOC_Os03g55100	Chr3:31344933-31350836	3.96165	7.16768	0.855404	1.86564	0.00215	0.0169396	cyclic nucleotide-gated ion channel 2, putative, expressed
LOC_Os02g56440	Chr2:34559237-34560374	21.0237	38.0172	0.854639	2.72439	0.00075	0.00738829	expressed protein
LOC_Os03g10460	Chr3:5324621-5330595	4.82513	8.72448	0.854502	1.76568	0.00375	0.0260313	expressed protein
LOC_Os07g48500	Chr7:29008870-29009943	30.3058	54.7588	0.853495	2.39594	0.00015	0.00189973	stress responsive protein, putative, expressed
LOC_Os12g06340	Chr12:3029595-3034778	29.25	52.8275	0.852853	3.12021	5e-05	0.00072992	BEL1-like homeodomain transcription factor, putative, expressed
LOC_Os07g32570	Chr7:19409952-19413299	118.494	213.983	0.852687	3.10764	5e-05	0.00072992	OsAPRL1 adenosine 5'-phosphosulfate reductase-like OsAPRL1, expressed
LOC_Os05g04620	Chr5:2172204-2174212	32.0124	57.8072	0.852617	2.49843	5e-05	0.00072992	expressed protein
LOC_Os12g14140	Chr12:8025151-8027413	5.3525	9.66438	0.852465	2.04051	0.0008	0.00773994	expressed protein
LOC_Os01g14410	Chr1:8061857-8062908	38.3906	69.3111	0.852335	1.98478	0.00065	0.00656619	early light-induced protein, chloroplast precursor, putative, expressed
LOC_Os02g53410	Chr2:32686076-32686828	59.5778	107.488	0.851327	2.51641	0.00015	0.00189973	expressed protein
LOC_Os03g18620	Chr3:10428926-10433732	15.9364	28.7393	0.850704	2.27214	0.0002	0.00243581	PPR repeat domain containing protein, putative, expressed
LOC_Os04g52440	Chr4:31169011-31174731	8.67971	15.6501	0.850457	2.15449	0.0003	0.00344573	aminotransferase, putative, expressed
LOC_Os09g30250	Chr9:18414042-18422769	3.49065	6.29277	0.850202	2.10273	0.0018	0.0147583	OsSub58 - Putative Subtilisin homologue, expressed
LOC_Os05g42210	Chr5:24676773-24682628	15.5868	28.0968	0.850083	2.54943	5e-05	0.00072992	serine/threonine-protein kinase receptor precursor, putative, expressed
LOC_Os12g04260	Chr12:1802705-1807516	3.42307	6.17004	0.84999	1.62027	0.00535	0.0338966	astaxanthin synthase KC28, putative, expressed
LOC_Os03g24560	Chr3:13995809-13996647	19.3797	34.9046	0.848875	2.27767	0.0008	0.00773994	ompA/MotB, putative, expressed
LOC_Os09g38772	Chr9:22278291-22281049	8.29456	14.9325	0.848215	1.92905	0.0011	0.010008	MOSC domain-containing protein, mitochondrial precursor, putative, expressed
LOC_Os05g48070	Chr5:27558742-27563026	10.0069	18.0131	0.848058	2.38385	5e-05	0.00072992	expressed protein
LOC_Os06g48250	Chr6:29184361-29186298	35.3792	63.6829	0.848002	3.13776	0.0001	0.00135054	ATPase, putative, expressed
LOC_Os08g29720	Chr8:18251996-18257565	80.4006	144.715	0.84794	2.52627	5e-05	0.00072992	mitochondrial carrier protein, putative, expressed
LOC_Os06g01360	Chr6:214966-218294	26.1191	47.0116	0.84791	2.50729	5e-05	0.00072992	homogentisate 1,2-dioxygenase, putative, expressed
LOC_Os12g36194	Chr12:22182884-22189908	13.3136	23.9591	0.847678	2.19423	0.0001	0.00135054	nucleoside diphosphate kinase, putative, expressed
LOC_Os02g15560	Chr2:8732272-8737878	2.86768	5.15991	0.847464	1.79305	0.0037	0.0257669	transposon protein, putative, Mutator sub-class, expressed
LOC_Os05g13390	Chr5:7432323-7438303	16.2939	29.3125	0.847179	2.354	5e-05	0.00072992	expressed protein
LOC_Os01g73730	Chr1:42710695-42712138	22.5665	40.5912	0.846985	2.66208	0.00015	0.00189973	RCLEA5 - Root cap and Late embryogenesis related family protein precursor, expressed
LOC_Os03g27770	Chr3:15923872-15927434	6.88163	12.3741	0.846498	2.05794	0.00045	0.00480686	heme oxygenase 2, putative, expressed
LOC_Os05g48422	Chr5:27764856-27766660	22.9733	41.3075	0.846444	2.54248	5e-05	0.00072992	60S ribosomal protein-related, putative, expressed
LOC_Os06g30370	Chr6:17539921-17542480	19.7352	35.4751	0.846036	2.11064	0.00145	0.0124502	osMFT1 MFT-Like1 homologous to Mother of FT and TFL1 gene; contains Pfam profile PF01161: Phosphatidylethanolamine-binding protein, expressed
LOC_Os07g37250	Chr7:22319006-22323191	16.4552	29.5771	0.845937	2.28362	0.00035	0.00391428	THYLAKOID FORMATION1, chloroplast precursor, putative, expressed
LOC_Os06g43270	Chr6:26003180-26010413	7.52642	13.522	0.845273	1.67104	0.00525	0.0334142	protein kinase domain containing protein, expressed
LOC_Os02g58090	Chr2:35553851-35558912	64.6283	116.108	0.845227	2.38642	5e-05	0.00072992	PSP domain containing protein, expressed
LOC_Os08g41460	Chr8:26174013-26185145	15.5373	27.9001	0.844532	2.13764	0.0002	0.00243581	expressed protein
LOC_Os09g30360	Chr9:18474986-18476381	10.8819	19.5363	0.844224	2.01503	0.0031	0.0224896	caffeoyl-CoA O-methyltransferase, putative, expressed
LOC_Os04g52180	Chr4:31000117-31001986	364.222	653.543	0.843466	2.36256	5e-05	0.00072992	expressed protein
LOC_Os09g15284	Chr9:9319982-9322013	10.6839	19.1439	0.841441	1.69338	0.00345	0.0244478	expressed protein
LOC_Os03g17790	Chr3:9899757-9900400	56.5471	101.315	0.841324	2.0584	0.0004	0.0043648	OsRCI2-5 - Putative low temperature and salt responsive protein, expressed
LOC_Os04g10350	Chr4:5590324-5592699	28.0182	50.181	0.840779	2.48982	5e-05	0.00072992	1-aminocyclopropane-1-carboxylate oxidase homolog 2, putative, expressed
LOC_Os03g13950	Chr3:7565321-7567803	110.981	198.748	0.840622	2.71534	5e-05	0.00072992	actin-depolymerizing factor, putative, expressed
LOC_Os04g53750	Chr4:32023857-32032485	2.91733	5.22291	0.840204	1.61238	0.00865	0.0482447	retrotransposon protein, putative, Ty3-gypsy subclass, expressed
LOC_Os02g06360	Chr2:3179476-3182791	5.87115	10.5047	0.839323	1.77805	0.00505	0.0323837	uncharacterized protein CPn_0526/CP_0226/CPj0526/CpB0547, putative, expressed
LOC_Os10g30530	Chr10:15874146-15876706	6.07445	10.8597	0.838152	2.46283	0.0017	0.0141133	lectin-like receptor kinase, putative, expressed
LOC_Os02g03010	Chr2:1184903-1186387	12.4309	22.2137	0.837513	2.08969	0.00055	0.00566905	expressed protein
LOC_Os09g33930	Chr9:20023946-20027482	39.6486	70.8268	0.837024	2.47842	5e-05	0.00072992	farnesyltransferase/geranylgeranyltransferase type-1 subunitalpha, putative, expressed
LOC_Os09g35670	Chr9:20519234-20522576	19.366	34.5894	0.836805	2.27387	5e-05	0.00072992	expressed protein
LOC_Os07g43510	Chr7:26036087-26039317	10.7336	19.1618	0.836101	1.84209	0.00195	0.0157495	40S ribosomal protein S9, putative, expressed
LOC_Os12g40550	Chr12:25086912-25091564	53.9682	96.3279	0.835843	2.54684	5e-05	0.00072992	peptidase, putative, expressed
LOC_Os04g32740	Chr4:19735870-19740198	6.57593	11.7357	0.835633	2.01354	0.0005	0.0052468	hydrolase, NUDIX family, domain containing protein, expressed
LOC_Os02g35950	Chr2:21596644-21602520	67.8493	121.085	0.835617	2.53134	5e-05	0.00072992	RNA recognition motif containing protein, putative, expressed
LOC_Os03g03510	Chr3:1514621-1519297	20.3348	36.266	0.834668	2.45305	5e-05	0.00072992	CAMK_KIN1/SNF1/Nim1_like.15 - CAMK includes calcium/calmodulin depedent protein kinases, expressed
LOC_Os06g41710	Chr6:24986837-24998104	2.43948	4.35008	0.834471	1.86817	0.00235	0.0181608	CW-type Zinc Finger, putative, expressed
LOC_Os04g35070	Chr4:21319616-21320638	14.9698	26.6922	0.834363	2.05589	0.0009	0.00853065	expressed protein
LOC_Os05g28840	Chr5:16908945-16910083	10.3225	18.4003	0.833941	1.86857	0.0026	0.0196402	expressed protein
LOC_Os04g39910	Chr4:23770071-23772456	1.93986	3.4576	0.833819	1.59361	0.00835	0.0469675	receptor-like protein kinase, putative, expressed
LOC_Os03g19390	Chr3:10911692-10913611	22.6035	40.2835	0.833643	2.17883	0.0003	0.00344573	TENA/THI-4 family protein, putative, expressed
LOC_Os02g33149	Chr2:19714869-19717682	9.11872	16.2472	0.833291	1.91566	0.001	0.00925019	OR, putative, expressed
LOC_Os05g40920	Chr5:24000266-24002607	3.34684	5.96202	0.833003	1.54207	0.00605	0.0370786	expressed protein
LOC_Os02g30050	Chr2:17846284-17847898	550.054	979.513	0.832492	2.66131	5e-05	0.00072992	ribosomal protein L29, putative, expressed
LOC_Os06g39370	Chr6:23367124-23368831	9.32182	16.5977	0.832296	2.14632	0.0029	0.0212917	OsFBK16 - F-box domain and kelch repeat containing protein, expressed
LOC_Os07g38170	Chr7:22889233-22890939	51.0493	90.7655	0.830253	2.91778	5e-05	0.00072992	remorin, putative, expressed
LOC_Os05g36340	Chr5:21514405-21515262	36.4222	64.746	0.829973	2.47635	0.00035	0.00391428	expressed protein
LOC_Os12g39320	Chr12:24191440-24197634	15.1186	26.873	0.829836	2.32912	5e-05	0.00072992	DUF221 domain containing protein, expressed
LOC_Os09g32510	Chr9:19406188-19408388	38.7468	68.7998	0.828328	2.48946	5e-05	0.00072992	BHLH transcription factor, putative, expressed
LOC_Os05g03820	Chr5:1698505-1703160	53.8671	95.5501	0.826854	2.5112	5e-05	0.00072992	glutamate--cysteine ligase, chloroplast precursor, putative, expressed
LOC_Os04g48484	Chr4:28903231-28904440	62.3973	110.635	0.826251	3.01296	5e-05	0.00072992	expressed protein
LOC_Os07g12770	Chr7:7310211-7313078	9.47896	16.8063	0.826201	2.01287	0.00085	0.00814427	transmembrane amino acid transporter protein, putative, expressed
LOC_Os06g30500	Chr6:17630571-17632346	8.3691	14.8067	0.823109	2.06217	0.00125	0.0110436	cytochrome P450, putative, expressed
LOC_Os04g42020	Chr4:24889982-24891487	16.3977	29.0079	0.822957	2.60414	0.00055	0.00566905	CCT/B-box zinc finger protein, putative, expressed
LOC_Os05g01950	Chr5:542155-542984	17.8826	31.6221	0.822378	1.7961	0.00275	0.0204362	expressed protein
LOC_Os11g40200	Chr11:23976786-23979856	5.65076	9.98285	0.821007	1.72151	0.00405	0.0276305	expressed protein
LOC_Os06g06860	Chr6:3241817-3246312	1.79172	3.16532	0.821006	1.55596	0.00765	0.0440926	MLA1, putative, expressed
LOC_Os03g19650	Chr3:11048487-11053465	3.72918	6.58569	0.820475	1.66566	0.0049	0.0317208	PPR2, putative, expressed
LOC_Os12g43130	Chr12:26780486-26783598	9.30115	16.4207	0.820034	1.97958	0.001	0.00925019	phytoene synthase, chloroplast precursor, putative, expressed
LOC_Os03g38950	Chr3:21634866-21637243	25.6948	45.3578	0.819877	2.27778	0.0001	0.00135054	chloroplast post-illumination chlorophyll fluorescence increase protein, putative, expressed
LOC_Os03g01020	Chr3:26525-28075	4.86913	8.58746	0.818567	1.59596	0.0043	0.0289136	pectinesterase inhibitor domain containing protein, putative, expressed
LOC_Os12g29220	Chr12:17302072-17305326	35.0133	61.7285	0.818034	2.38403	5e-05	0.00072992	nodulin MtN3 family protein, putative, expressed
LOC_Os02g07160	Chr2:3674672-3679955	52.8436	93.069	0.816573	2.42774	0.00015	0.00189973	glyoxalase family protein, putative, expressed
LOC_Os04g42950	Chr4:25404932-25407689	29.0191	51.1066	0.816507	2.32771	0.00015	0.00189973	MYB family transcription factor, putative, expressed
LOC_Os03g14400	Chr3:7831875-7833791	9.54157	16.8024	0.816371	2.17238	0.00115	0.0103875	cytochrome P450, putative, expressed
LOC_Os05g37170	Chr5:21715715-21724565	15.3448	27.0102	0.815759	2.19533	0.00035	0.00391428	transcription factor, putative, expressed
LOC_Os03g14510	Chr3:7874536-7878430	8.00957	14.0971	0.8156	1.75356	0.0036	0.0252477	immature colon carcinoma transcript 1 protein precursor, putative, expressed
LOC_Os03g36080	Chr3:20018643-20019699	101.731	178.95	0.814794	2.73892	5e-05	0.00072992	expressed protein
LOC_Os10g12290	Chr10:6836251-6841292	6.40836	11.2652	0.813841	1.54698	0.00705	0.0416011	expressed protein
LOC_Os08g13630	Chr8:8104901-8107543	6.03532	10.6086	0.813728	1.95216	0.00155	0.0131947	expressed protein
LOC_Os01g03750	Chr1:1569584-1570939	11.9462	20.9975	0.813669	1.85816	0.00685	0.0406324	expressed protein
LOC_Os02g52744	Chr2:32261575-32267534	7.37545	12.9608	0.813349	1.71902	0.0033	0.023631	DCL, chloroplast precursor, putative, expressed
LOC_Os02g13970	Chr2:7621904-7627260	5.03518	8.84324	0.812531	1.991	0.00065	0.00656619	Complex I intermediate-associated protein 30 domain containing protein, putative, expressed
LOC_Os07g41160	Chr7:24632318-24636319	16.5932	29.1375	0.812283	2.4355	0.0002	0.00243581	protein of unknown function DUF1675 domain containing protein, expressed
LOC_Os05g26020	Chr5:15124583-15125829	9.61387	16.8811	0.812219	2.06805	0.00405	0.0276305	cyclin, putative, expressed
LOC_Os02g38190	Chr2:23105539-23106569	150.596	264.393	0.812005	2.85545	5e-05	0.00072992	expressed protein
LOC_Os03g11230	Chr3:5777775-5779388	15.1894	26.6631	0.811779	1.92078	0.00045	0.00480686	expressed protein
LOC_Os01g63310	Chr1:36697007-36698963	3.69097	6.47299	0.81043	1.78086	0.00885	0.0490842	DUF740 domain containing protein, expressed
LOC_Os06g07820	Chr6:3795463-3798623	21.4105	37.5479	0.810417	2.25959	0.0002	0.00243581	BSD domain containing protein, expressed
LOC_Os01g13730	Chr1:7679029-7685923	32.081	56.2598	0.810387	2.44498	5e-05	0.00072992	WD domain, G-beta repeat domain containing protein, expressed
LOC_Os04g25570	Chr4:14821181-14826775	8.15	14.2841	0.809539	2.05774	0.0003	0.00344573	protein phosphatase 2C, putative, expressed
LOC_Os02g45000	Chr2:27261969-27263595	37.0111	64.8281	0.808662	2.74401	5e-05	0.00072992	expressed protein
LOC_Os10g34810	Chr10:18588275-18590981	4.57817	8.01383	0.807719	1.69085	0.00765	0.0440926	expressed protein
LOC_Os04g57300	Chr4:34114117-34116955	64.8629	113.509	0.807348	2.38698	5e-05	0.00072992	phosphatidylinositol 3- and 4-kinase family protein, putative, expressed
LOC_Os01g02400	Chr1:770331-773851	3.78767	6.62702	0.807049	1.80568	0.0027	0.0201843	protein kinase domain containing protein, expressed
LOC_Os01g16810	Chr1:9567525-9569263	6.01104	10.5151	0.806776	2.04012	0.00355	0.0250075	MYB family transcription factor, putative, expressed
LOC_Os01g56350	Chr1:32470273-32479148	5.83337	10.1955	0.805528	2.09884	0.0004	0.0043648	PTAC12, putative, expressed
LOC_Os03g06850	Chr3:3469652-3471023	7.73677	13.5127	0.804514	1.63543	0.0084	0.0471819	B3 DNA binding domain containing protein, expressed
LOC_Os09g35910	Chr9:20671753-20673282	50.038	87.339	0.803603	2.58533	0.0001	0.00135054	homeobox associated leucine zipper, putative, expressed
LOC_Os05g44570	Chr5:25927983-25935287	3.04132	5.3077	0.803387	1.68143	0.005	0.0321583	histidine-containing phosphotransfer protein, putative, expressed
LOC_Os05g34470	Chr5:20438343-20441717	3.29572	5.74835	0.802556	1.85099	0.00165	0.013809	expressed protein
LOC_Os02g49760	Chr2:30418452-30423404	34.774	60.6294	0.802008	2.33607	5e-05	0.00072992	potassium transporter, putative, expressed
LOC_Os03g43420	Chr3:24215220-24219448	5.0114	8.73687	0.801902	1.6083	0.0059	0.0363747	single-stranded DNA-binding protein, putative, expressed
LOC_Os10g20470	Chr10:10301574-10304395	32.3411	56.3741	0.801663	2.47017	0.00015	0.00189973	MATE efflux family protein, putative, expressed
LOC_Os07g44830	Chr7:26768337-26774167	4.14188	7.21901	0.801517	1.79633	0.0032	0.0230815	proline-rich family protein, putative, expressed
LOC_Os03g10050	Chr3:5063812-5065197	7.51585	13.0975	0.801278	1.99185	0.0074	0.0430582	serine acetyltransferase protein, putative, expressed
LOC_Os01g12810	Chr1:7092031-7095355	4.33177	7.53941	0.799496	1.96822	0.00235	0.0181608	retrotransposon protein, putative, unclassified, expressed
LOC_Os04g37700	Chr4:22425446-22426575	11.7676	20.4604	0.798013	1.87204	0.00495	0.0319316	expressed protein
LOC_Os01g41810	Chr1:23673291-23675869	4.6536	8.0906	0.797897	1.56977	0.0085	0.04762	cytochrome P450 72A1, putative, expressed
LOC_Os10g40020	Chr10:21434983-21439378	7.56214	13.1387	0.79696	1.97691	0.00085	0.00814427	oxidoreductase, short chain dehydrogenase/reductase family domain containing family, expressed
LOC_Os03g42130	Chr3:23450163-23452171	65.9941	114.604	0.796252	2.75987	5e-05	0.00072992	gibberellin 20 oxidase 2, putative, expressed
LOC_Os08g44290	Chr8:27877342-27882184	16.3567	28.4023	0.796124	1.76776	0.00245	0.018727	RNA recognition motif containing protein, putative, expressed
LOC_Os05g15360	Chr5:8691771-8696463	8.40181	14.5884	0.796045	1.61699	0.0067	0.0400118	expressed protein
LOC_Os07g13810	Chr7:7911924-7913775	12.4785	21.6579	0.795445	2.34703	0.0014	0.0120995	cytokinin-N-glucosyltransferase 1, putative, expressed
LOC_Os09g21230	Chr9:12817152-12821684	75.7367	131.365	0.794511	2.28329	5e-05	0.00072992	AMP-binding enzyme, putative, expressed
LOC_Os04g37580	Chr4:22353706-22357999	10.0606	17.4237	0.792328	1.95135	0.0013	0.0113923	cation transport regulator-like protein 1, putative, expressed
LOC_Os03g49220	Chr3:28035485-28038970	4.00521	6.93558	0.79214	1.59914	0.00735	0.0428405	adenylosuccinate synthetase, chloroplast precursor, putative, expressed
LOC_Os12g41715	Chr12:25828363-25832900	38.2346	66.1992	0.791933	2.40213	0.0001	0.00135054	DEAD-box ATP-dependent RNA helicase, putative, expressed
LOC_Os04g38680	Chr4:22977813-22980352	26.6749	46.1838	0.791903	2.42451	0.0001	0.00135054	transmembrane amino acid transporter protein, putative, expressed
LOC_Os03g63330	Chr3:35790046-35795496	9.48869	16.4252	0.791629	2.06186	0.0006	0.00612607	aspartokinase, chloroplast precursor, putative, expressed
LOC_Os02g09810	Chr2:5058715-5061965	44.4936	77.0145	0.791533	2.36168	5e-05	0.00072992	amino acid transporter, putative, expressed
LOC_Os06g48030	Chr6:29050767-29054613	50.7519	87.8157	0.791018	2.53252	0.0001	0.00135054	peroxidase precursor, putative, expressed
LOC_Os01g51530	Chr1:29598880-29601172	8.31764	14.3917	0.790989	1.66179	0.00405	0.0276305	methyltransferase domain containing protein, expressed
LOC_Os04g57290	Chr4:34110318-34112206	9.43166	16.3181	0.790887	2.04479	0.0008	0.00773994	OsFBX153 - F-box domain containing protein, expressed
LOC_Os12g02390	Chr12:783539-788120	6.80874	11.7792	0.790787	2.11367	5e-05	0.00072992	vacuolar-sorting receptor precursor, putative, expressed
LOC_Os09g16760	Chr9:10252138-10254787	7.60619	13.1586	0.790757	2.03064	0.00035	0.00391428	ankyrin repeat family protein, putative, expressed
LOC_Os04g39660	Chr4:23630049-23631990	57.8382	100.036	0.790431	2.48152	0.0001	0.00135054	OsFBDUF22 - F-box and DUF domain containing protein, expressed
LOC_Os07g09010	Chr7:4697185-4699622	39.3722	68.0936	0.790343	2.70945	0.0002	0.00243581	nodulin, putative, expressed
LOC_Os07g34610	Chr7:20749665-20751833	18.0276	31.1771	0.790278	2.03273	0.0007	0.00697948	oral cancer overexpressed protein 1, putative, expressed
LOC_Os08g23150	Chr8:13954451-13958415	44.8631	77.5687	0.789945	2.32284	5e-05	0.00072992	indole-3-glycerol phosphate synthase, chloroplast precursor, putative, expressed
LOC_Os01g37690	Chr1:21071369-21076730	40.3605	69.7686	0.789631	2.38156	0.0001	0.00135054	sodium/calcium exchanger protein, putative, expressed
LOC_Os07g48730	Chr7:29179660-29181610	10.3084	17.8166	0.789392	2.02108	0.001	0.00925019	tyrosine protein kinase domain containing protein, putative, expressed
LOC_Os06g40640	Chr6:24227135-24229290	7.41685	12.8182	0.789318	1.72249	0.00585	0.0361319	fructose-bisphospate aldolase isozyme, putative, expressed
LOC_Os08g22852	Chr8:13738800-13740419	5.78165	9.98755	0.788651	1.60103	0.0072	0.0422038	expressed protein
LOC_Os10g30156	Chr10:15673127-15681124	7.95755	13.7341	0.787364	2.14688	0.0002	0.00243581	starch synthase, putative, expressed
LOC_Os08g03870	Chr8:1843878-1846218	13.0153	22.4457	0.786235	1.86598	0.0016	0.013514	2-aminoethanethiol dioxygenase, putative, expressed
LOC_Os05g24160	Chr5:13939692-13946672	14.2792	24.622	0.786034	2.17798	0.00025	0.00295117	double-stranded RNA binding motif containing protein, expressed
LOC_Os08g43190	Chr8:27315937-27318495	116.412	200.723	0.785971	2.56577	5e-05	0.00072992	dehydrogenase, putative, expressed
LOC_Os07g44890	Chr7:26790784-26792117	30.7864	53.0738	0.785707	2.59221	0.0003	0.00344573	gibberellin receptor GID1L2, putative, expressed
LOC_Os05g43650	Chr5:25382321-25385633	7.54142	12.9984	0.785423	1.9263	0.00165	0.013809	expressed protein
LOC_Os03g60130	Chr3:34194881-34197992	71.7513	123.605	0.784656	2.32501	0.0001	0.00135054	transcription elongation factor protein, putative, expressed
LOC_Os03g16170	Chr3:8921369-8923437	6.14191	10.5795	0.784518	1.7999	0.0058	0.0358976	protein phosphatase 2C, putative, expressed
LOC_Os03g62370	Chr3:35332051-35334422	29.5827	50.9539	0.784438	2.86849	0.0001	0.00135054	WD40-like Beta Propeller Repeat family protein, expressed
LOC_Os01g74190	Chr1:42977144-42979816	5.7511	9.90425	0.78421	1.67544	0.00545	0.0343111	radical SAM enzyme, putative, expressed
LOC_Os01g14950	Chr1:8382093-8387260	140.931	242.7	0.784191	2.1916	0.00015	0.00189973	importin subunit alpha, putative, expressed
LOC_Os01g08970	Chr1:4497718-4504407	54.8838	94.4576	0.783287	2.35825	5e-05	0.00072992	SSRP1-like FACT complex subunit, putative, expressed
LOC_Os08g07390	Chr8:4147047-4149998	9.73691	16.736	0.781417	2.06579	0.0006	0.00612607	mla1, putative, expressed
LOC_Os10g23310	Chr10:12181084-12183127	8.04317	13.8211	0.781034	2.10459	0.0078	0.0447837	transferase family protein, putative, expressed
LOC_Os06g34040	Chr6:19824520-19829657	34.3108	58.9485	0.780793	2.29327	5e-05	0.00072992	DJ-1 family protein, putative, expressed
LOC_Os11g37990	Chr11:22523575-22529593	4.94279	8.49197	0.780773	1.97211	0.0004	0.0043648	chloroplastic group IIA intron splicing facilitator CRS1, chloroplast precursor, putative, expressed
LOC_Os01g43150	Chr1:24616102-24623185	22.8398	39.2273	0.780306	2.19171	0.00015	0.00189973	OsFtsH9 FtsH protease, homologue of AtFtsH11, expressed
LOC_Os04g57410	Chr4:34161728-34164361	11.6052	19.9249	0.779798	1.85796	0.00125	0.0110436	methylthioribose kinase, putative, expressed
LOC_Os06g02380	Chr6:811033-816534	86.6671	148.639	0.778257	2.37685	0.0001	0.00135054	T-complex protein, putative, expressed
LOC_Os05g44300	Chr5:25776475-25778593	11.4541	19.6428	0.778138	1.9569	0.0043	0.0289136	plant-specific domain TIGR01615 family protein, expressed
LOC_Os03g31490	Chr3:17939617-17942646	54.6589	93.6654	0.77706	2.33264	0.00015	0.00189973	expressed protein
LOC_Os03g11900	Chr3:6232978-6238297	42.7003	73.1675	0.776955	2.28937	0.00015	0.00189973	transporter family protein, putative, expressed
LOC_Os10g37230	Chr10:19915686-19916952	9.05605	15.5096	0.776205	1.95101	0.00415	0.0281755	expressed protein
LOC_Os12g16410	Chr12:9397033-9400411	22.0379	37.722	0.775416	2.08435	0.00035	0.00391428	isoflavone reductase, putative, expressed
LOC_Os04g59570	Chr4:35426963-35429654	9.52418	16.3013	0.775316	1.83982	0.00235	0.0181608	expressed protein
LOC_Os03g63110	Chr3:35673282-35676863	4.57724	7.82927	0.774402	1.71626	0.00255	0.0193238	prefoldin, putative, expressed
LOC_Os02g33580	Chr2:19973186-19977453	19.3072	33.0242	0.774383	2.27962	5e-05	0.00072992	digalactosyldiacylglycerol synthase, chloroplast precursor, putative, expressed
LOC_Os08g39980	Chr8:25325993-25329360	17.0762	29.2	0.77398	2.87827	0.0001	0.00135054	DNA-binding bromodomain-containing protein, putative, expressed
LOC_Os06g04330	Chr6:1838556-1842840	8.9739	15.3433	0.773807	1.90906	0.00095	0.00888084	expressed protein
LOC_Os06g31960	Chr6:18578401-18579512	20.6159	35.2403	0.773467	1.836	0.00145	0.0124502	THION5 - Plant thionin family protein precursor, expressed
LOC_Os02g43930	Chr2:26519325-26523437	117.568	200.885	0.772879	2.25448	0.00015	0.00189973	chaperone protein dnaJ, putative, expressed
LOC_Os01g61010	Chr1:35302491-35305739	2.68038	4.57676	0.771887	1.5616	0.00835	0.0469675	nodulin, putative, expressed
LOC_Os12g39650	Chr12:24478659-24482780	4.91781	8.39576	0.771646	1.75758	0.00245	0.018727	tubulin, putative, expressed
LOC_Os01g44050	Chr1:25234660-25238165	5.15773	8.79801	0.770441	1.74474	0.0033	0.023631	siroheme synthase, putative, expressed
LOC_Os03g63074	Chr3:35659819-35666982	1.70524	2.90859	0.770345	1.56849	0.008	0.0455149	Ser/Thr protein phosphatase family protein, expressed
LOC_Os01g67570	Chr1:39270531-39274996	5.6462	9.63046	0.770326	1.89592	0.0014	0.0120995	PDE312/PTAC10, putative, expressed
LOC_Os03g19427	Chr3:10929482-10930895	79.4261	135.457	0.77015	2.53289	0.001	0.00925019	nicotianamine synthase, putative, expressed
LOC_Os12g38430	Chr12:23589629-23593485	45.5762	77.7057	0.769741	2.29049	0.00025	0.00295117	SR repressor protein, putative, expressed
LOC_Os02g01380	Chr2:219576-221707	7.36099	12.5457	0.769217	2.08598	0.00185	0.0150851	expressed protein
LOC_Os12g15680	Chr12:8960776-8964018	73.4227	125.132	0.769156	2.22786	0.00025	0.00295117	laccase precursor protein, putative, expressed
LOC_Os04g51770	Chr4:30678805-30681800	9.60805	16.3693	0.768677	1.72201	0.00375	0.0260313	expressed protein
LOC_Os02g21920	Chr2:13039012-13040263	95.6841	163	0.768524	2.68493	0.0001	0.00135054	CPuORF24 - conserved peptide uORF-containing transcript, expressed
LOC_Os11g35050	Chr11:20533031-20538185	2.1398	3.64434	0.768181	1.59602	0.00665	0.039773	expressed protein
LOC_Os01g33514	Chr1:18446989-18448953	13.4284	22.8675	0.768015	1.78018	0.00245	0.018727	expressed protein
LOC_Os04g41570	Chr4:24655104-24660071	17.9564	30.5576	0.767032	2.00834	0.00045	0.00480686	ethylene-responsive protein related, putative, expressed
LOC_Os08g37840	Chr8:23969344-23970659	12.2472	20.8358	0.766611	2.10372	0.0042	0.0284177	phosphate-induced protein 1 conserved region domain containing protein, expressed
LOC_Os02g36070	Chr2:21690377-21692186	7.58801	12.9073	0.766398	1.681	0.00325	0.0233502	cytochrome P450, putative, expressed
LOC_Os06g02420	Chr6:832536-834915	29.1558	49.5867	0.766171	1.77863	0.002	0.0160445	ATOZI1, putative, expressed
LOC_Os04g39100	Chr4:23235805-23237196	12.3565	21.0147	0.766124	2.19379	0.0024	0.0184335	peroxidase precursor, putative, expressed
LOC_Os08g39730	Chr8:25155157-25156888	25.4094	43.2098	0.765996	2.40749	0.0002	0.00243581	cytochrome P450, putative, expressed
LOC_Os03g45400	Chr3:25627101-25631164	9.74192	16.5648	0.765839	1.90938	0.00085	0.00814427	antitermination NusB domain-containing protein, putative, expressed
LOC_Os03g55990	Chr3:31869146-31871521	26.2714	44.661	0.765524	2.22919	0.0004	0.0043648	homeobox domain containing protein, expressed
LOC_Os09g31478	Chr9:18978135-18983481	48.8898	83.1094	0.765479	2.29872	0.0002	0.00243581	auxin efflux carrier component, putative, expressed
LOC_Os12g28015	Chr12:16519710-16520331	202.421	344.03	0.765174	2.40159	0.0001	0.00135054	expressed protein
LOC_Os08g25390	Chr8:15438855-15450607	25.0974	42.6536	0.76513	2.38823	0.0001	0.00135054	bifunctional aspartokinase/homoserine dehydrogenase, chloroplast precursor, putative, expressed
LOC_Os11g18570	Chr11:10474863-10477749	27.0045	45.8862	0.764858	2.04318	0.00035	0.00391428	cytochrome P450, putative, expressed
LOC_Os03g41419	Chr3:23048221-23053499	13.8706	23.5653	0.76464	2.15589	5e-05	0.00072992	serpin domain containing protein, putative, expressed
LOC_Os06g05390	Chr6:2433392-2437377	13.4692	22.8827	0.764589	1.93137	0.0007	0.00697948	expressed protein
LOC_Os05g06300	Chr5:3219998-3228123	3.23287	5.49036	0.764084	1.71213	0.00305	0.0221945	3-hydroxyacyl-CoA dehydrogenase, putative, expressed
LOC_Os04g13210	Chr4:7301572-7312295	3.80682	6.46505	0.764074	1.90926	0.00125	0.0110436	multidrug resistance-associated protein, putative, expressed
LOC_Os12g38440	Chr12:23596108-23600231	7.66996	13.0152	0.762908	1.8533	0.0022	0.0172309	XH domain containing protein, expressed
LOC_Os03g59320	Chr3:33771755-33773624	13.4871	22.8785	0.762416	1.86997	0.001	0.00925019	expressed protein
LOC_Os05g02070	Chr5:605759-606871	311.255	527.874	0.762099	2.12655	0.0005	0.0052468	expressed protein
LOC_Os02g20200	Chr2:11897100-11902226	1.67609	2.84179	0.761703	1.71753	0.00495	0.0319316	retrotransposon protein, putative, unclassified, expressed
LOC_Os06g42560	Chr6:25590232-25594488	93.4039	158.339	0.761462	2.43708	0.00015	0.00189973	tryptophan synthase beta chain 2, putative, expressed
LOC_Os03g51610	Chr3:29535970-29543274	6.53252	11.0646	0.760244	1.92125	0.00135	0.0117355	Inositol 1, 3, 4-trisphosphate 5/6-kinase, putative, expressed
LOC_Os06g21330	Chr6:12318390-12322832	4.85539	8.22189	0.759884	1.80843	0.00225	0.0175648	ABB1 - Ankyrin repeat region with 2 Bric-a-Brac, Tramtrack, Broad Complex BTB domains, expressed
LOC_Os03g58070	Chr3:33061356-33065192	126.34	213.923	0.759783	2.23358	0.00035	0.00391428	frigida, putative, expressed
LOC_Os02g32250	Chr2:19044772-19050877	9.86249	16.6803	0.758122	2.1207	0.00025	0.00295117	retrotransposon protein, putative, unclassified, expressed
LOC_Os05g33840	Chr5:19957138-19963120	10.9513	18.5203	0.758003	2.23	0.00035	0.00391428	transketolase, putative, expressed
LOC_Os06g31800	Chr6:18466973-18468117	57.3901	97.0459	0.757865	1.91294	0.00095	0.00888084	THION2 - Plant thionin family protein precursor, expressed
LOC_Os05g46020	Chr5:26682471-26684208	14.9944	25.339	0.756935	2.0053	0.0008	0.00773994	WRKY7, expressed
LOC_Os04g31804	Chr4:19042702-19058654	17.9281	30.2899	0.756613	2.06176	0.00065	0.00656619	OsMADS64 - MADS-box family gene with M-alpha type-box, expressed
LOC_Os01g07090	Chr1:3332951-3336075	9.15401	15.4591	0.755977	1.76327	0.00265	0.0199294	5-azacytidine resistance protein azr1, putative, expressed
LOC_Os06g05420	Chr6:2449088-2449823	16.331	27.5584	0.754882	1.56389	0.0072	0.0422038	expressed protein
LOC_Os08g02070	Chr8:679357-681739	37.2805	62.8939	0.754499	2.21327	0.00025	0.00295117	OsMADS26 - MADS-box family gene with MIKCc type-box, expressed
LOC_Os09g32840	Chr9:19581484-19586210	6.34527	10.6929	0.752899	1.87117	0.00155	0.0131947	nucleotide pyrophosphatase/phosphodiesterase, putative, expressed
LOC_Os11g45850	Chr11:27740141-27741375	17.1249	28.8428	0.752119	1.86797	0.0013	0.0113923	WRKY61, expressed
LOC_Os02g43670	Chr2:26348649-26353479	4.63834	7.8106	0.751826	1.85125	0.00185	0.0150851	transferase family protein, putative, expressed
LOC_Os04g24170	Chr4:13821588-13830213	23.5596	39.6718	0.7518	2.30381	0.0002	0.00243581	RNA recognition motif containing protein, putative, expressed
LOC_Os01g09320	Chr1:4738904-4744591	107.036	180.23	0.75174	2.13597	0.00025	0.00295117	NADP-dependent malic enzyme, chloroplast precursor, putative, expressed
LOC_Os03g13770	Chr3:7453612-7457796	6.92775	11.6526	0.750191	1.85229	0.00125	0.0110436	tubulin, putative, expressed
LOC_Os04g42380	Chr4:25076763-25079041	43.9864	73.9584	0.749655	2.10939	0.00045	0.00480686	ribosomal protein S17, putative, expressed
LOC_Os03g38730	Chr3:21498056-21500615	97.2619	163.509	0.749427	2.29324	0.0002	0.00243581	peroxisomal membrane protein, putative, expressed
LOC_Os03g59030	Chr3:33599054-33600843	18.0313	30.3063	0.749113	2.31573	0.001	0.00925019	UDP-rhamnose rhamnosyltransferase, putative, expressed
LOC_Os01g33420	Chr1:18394241-18401699	27.9809	47.0128	0.748613	2.31497	0.00025	0.00295117	glycosyl hydrolase family protein 27, putative, expressed
LOC_Os01g07870	Chr1:3804527-3811030	11.1136	18.6718	0.748533	2.21056	0.0002	0.00243581	ABC transporter family protein, putative, expressed
LOC_Os10g04050	Chr10:1858232-1866072	2.37342	3.98694	0.748316	1.91339	0.0013	0.0113923	transposon protein, putative, CACTA, En/Spm sub-class, expressed
LOC_Os08g37700	Chr8:23871194-23876240	2.64955	4.45077	0.748307	1.63191	0.00635	0.0384325	RNA recognition motif containing protein, putative, expressed
LOC_Os06g30310	Chr6:17488831-17501184	15.3212	25.7332	0.748102	2.31668	0.00035	0.00391428	alpha-glucan water dikinase, chloroplast precursor, putative, expressed
LOC_Os12g20390	Chr12:11904645-11907293	59.2861	99.5571	0.74783	2.27804	5e-05	0.00072992	expressed protein
LOC_Os11g01880	Chr11:481056-484727	17.7902	29.8694	0.74759	2.06003	0.00085	0.00814427	expressed protein
LOC_Os01g51040	Chr1:29318191-29322569	3.79786	6.37566	0.747387	1.66978	0.00485	0.0314741	transmembrane protein 16K, putative, expressed
LOC_Os03g42650	Chr3:23738884-23746139	5.54887	9.30776	0.746241	1.85476	0.00095	0.00888084	vegetative storage protein, putative, expressed
LOC_Os02g18090	Chr2:10509142-10512248	33.437	56.0855	0.746182	2.34177	0.00045	0.00480686	expressed protein
LOC_Os06g05440	Chr6:2457357-2458249	83.5783	140.136	0.745627	2.34779	0.0004	0.0043648	expressed protein
LOC_Os09g31490	Chr9:18994538-18998420	11.3932	19.0865	0.744378	1.83916	0.00175	0.0144328	reductase, putative, expressed
LOC_Os08g10630	Chr8:6267822-6270905	25.7639	43.1526	0.744097	2.24946	0.00015	0.00189973	metal cation transporter, putative, expressed
LOC_Os04g35910	Chr4:21893257-21896405	46.5017	77.8852	0.744065	2.23238	0.0001	0.00135054	coiled-coil domain-containing protein 55, putative, expressed
LOC_Os05g45750	Chr5:26500565-26504264	8.79845	14.7327	0.743703	1.8383	0.00175	0.0144328	ATP-dependent Clp protease ATP-binding subunit clpX, putative, expressed
LOC_Os08g17294	Chr8:10567330-10578011	26.4873	44.3439	0.743434	1.92796	0.00115	0.0103875	PSF3 - Putative GINS complex subunit, expressed
LOC_Os06g04530	Chr6:1949423-1953325	32.3588	54.149	0.742775	2.10422	0.00055	0.00566905	OsClp9 - Putative Clp protease homologue, expressed
LOC_Os06g43800	Chr6:26375955-26379227	9.2499	15.4647	0.741466	1.76186	0.0023	0.017873	methyltransferase domain containing protein, putative, expressed
LOC_Os02g33450	Chr2:19882051-19886345	44.4748	74.332	0.740995	2.15276	0.00025	0.00295117	peroxiredoxin, putative, expressed
LOC_Os02g10970	Chr2:5826294-5834386	23.9836	40.0832	0.740946	2.22125	5e-05	0.00072992	peptidyl-prolyl cis-trans isomerase, putative, expressed
LOC_Os04g41710	Chr4:24725906-24728710	24.5881	41.0738	0.740256	2.17595	0.0008	0.00773994	expressed protein
LOC_Os06g36220	Chr6:21208191-21218155	5.18156	8.65527	0.740194	1.53346	0.00755	0.043696	OsFBX198 - F-box domain containing protein, expressed
LOC_Os06g07030	Chr6:3337082-3338612	38.9073	64.9591	0.739492	2.37966	0.00025	0.00295117	AP2 domain containing protein, expressed
LOC_Os02g43540	Chr2:26271678-26272657	29.9846	50.0618	0.739489	2.15067	0.0008	0.00773994	retrotransposon protein, putative, unclassified, expressed
LOC_Os02g09150	Chr2:4693809-4699300	25.5665	42.6675	0.738884	2.18579	0.0002	0.00243581	inorganic H+ pyrophosphatase, putative, expressed
LOC_Os03g22740	Chr3:13133805-13137180	74.0142	123.507	0.738719	2.21548	0.00015	0.00189973	nucleolar protein NOP5-1, putative, expressed
LOC_Os06g14030	Chr6:7799072-7806571	29.6643	49.496	0.738586	2.19941	0.0001	0.00135054	potassium channel SKOR, putative, expressed
LOC_Os03g21000	Chr3:11919250-11921367	37.3255	62.2769	0.738537	2.14807	5e-05	0.00072992	thioredoxin, putative, expressed
LOC_Os09g37012	Chr9:21347234-21350906	24.2436	40.4419	0.738247	2.13755	5e-05	0.00072992	eukaryotic aspartyl protease domain containing protein, expressed
LOC_Os04g52660	Chr4:31340182-31344730	10.5892	17.6638	0.738204	1.85446	0.0017	0.0141133	expressed protein
LOC_Os01g01790	Chr1:416240-420497	19.3413	32.248	0.737523	2.20588	0.00025	0.00295117	expressed protein
LOC_Os05g02190	Chr5:687859-690396	9.75464	16.2622	0.737361	1.61885	0.00545	0.0343111	expressed protein
LOC_Os04g03164	Chr4:1320595-1321461	52.2641	87.1178	0.737146	1.77997	0.0021	0.0166061	expressed protein
LOC_Os05g10754	Chr5:5927507-5929954	21.3009	35.4782	0.736014	2.01789	0.0006	0.00612607	expressed protein
LOC_Os03g31090	Chr3:17714960-17716432	168.918	281.249	0.735525	2.07729	0.00055	0.00566905	40S ribosomal protein S19, putative, expressed
LOC_Os09g30412	Chr9:18514571-18518316	271.541	452.075	0.735394	1.75963	0.0027	0.0201843	heat shock protein, putative, expressed
LOC_Os03g21040	Chr3:11957260-11959777	650.402	1082.28	0.734665	1.64444	0.00655	0.039343	stress responsive protein, putative, expressed
LOC_Os03g57640	Chr3:32851424-32852782	10.4776	17.4236	0.733736	1.94281	0.00715	0.0420038	gibberellin receptor GID1L2, putative, expressed
LOC_Os10g41250	Chr10:22166886-22168850	7.04074	11.7059	0.733432	1.96026	0.00325	0.0233502	glycoprotein, putative, expressed
LOC_Os09g38510	Chr9:22156925-22159600	21.5764	35.8685	0.73326	2.24467	0.0023	0.017873	purine permease, putative, expressed
LOC_Os05g43920	Chr5:25555849-25561791	3.14009	5.21567	0.732046	1.60931	0.0063	0.0382271	auxin response factor 14, putative, expressed
LOC_Os10g26660	Chr10:13919923-13925643	26.6797	44.3127	0.731977	2.10204	0.00015	0.00189973	expressed protein
LOC_Os03g47120	Chr3:26651597-26657847	4.21417	6.99864	0.731825	1.6586	0.00385	0.0265706	CBS domain containing protein, expressed
LOC_Os01g43090	Chr1:24579620-24582077	20.0829	33.3521	0.731811	1.99039	0.00055	0.00566905	oxidoreductase, aldo/keto reductase family protein, putative, expressed
LOC_Os08g37790	Chr8:23934855-23938888	35.5978	59.1147	0.73173	2.18269	0.00015	0.00189973	phospho-2-dehydro-3-deoxyheptonate aldolase, chloroplast precursor, putative, expressed
LOC_Os03g45730	Chr3:25805320-25810839	6.76642	11.2329	0.731268	1.94218	0.00055	0.00566905	DNA-binding protein-like, putative, expressed
LOC_Os01g29409	Chr1:16480362-16494335	7.64188	12.6844	0.731059	1.91638	0.00075	0.00738829	tRNA methyltransferase, putative, expressed
LOC_Os02g39180	Chr2:23664744-23667163	110.248	182.889	0.730214	2.19182	0.0004	0.0043648	expressed protein
LOC_Os03g53910	Chr3:30903858-30907128	29.0553	48.1982	0.730178	2.14399	0.0001	0.00135054	tetratricopeptide repeat domain containing protein, expressed
LOC_Os02g13060	Chr2:6915412-6916666	47.8193	79.2857	0.729467	2.35193	0.0006	0.00612607	expressed protein
LOC_Os06g45100	Chr6:27275438-27278872	6.71427	11.1313	0.729318	1.72638	0.0026	0.0196402	FAD binding domain of DNA photolyase domain containing protein, expressed
LOC_Os04g57210	Chr4:34083435-34087586	31.4334	52.0983	0.728936	2.1438	0.00025	0.00295117	actin-6, putative, expressed
LOC_Os03g62870	Chr3:35562753-35565081	19.5324	32.3699	0.728787	1.74558	0.00395	0.0271349	DNA-directed RNA polymerases I, II, and III subunit RPABC3, putative, expressed
LOC_Os10g41780	Chr10:22478157-22486537	11.9324	19.7727	0.728635	1.54978	0.00855	0.0478101	chlorophyllide a oxygenase, chloroplast precursor, putative, expressed
LOC_Os10g40934	Chr10:21988521-21993690	34.0202	56.3719	0.728586	1.97113	0.0007	0.00697948	flavonol synthase/flavanone 3-hydroxylase, putative, expressed
LOC_Os03g07580	Chr3:3859384-3864725	14.4882	24.0036	0.728367	2.19349	0.0002	0.00243581	OsNucAP1 - Putative Nucleoporin Autopeptidase homologue, expressed
LOC_Os05g48790	Chr5:27957804-27964105	5.16063	8.54683	0.727841	1.61809	0.00675	0.04027	expressed protein
LOC_Os01g45360	Chr1:25748191-25750466	19.1813	31.7653	0.727753	2.44164	0.00125	0.0110436	membrane associated DUF588 domain containing protein, putative, expressed
LOC_Os01g73980	Chr1:42855656-42857466	37.5194	62.134	0.727745	2.21926	0.00015	0.00189973	xylem cysteine proteinase 2 precursor, putative, expressed
LOC_Os10g34400	Chr10:18343005-18352029	18.937	31.3396	0.72678	2.17094	0.00015	0.00189973	expressed protein
LOC_Os10g38930	Chr10:20736982-20738313	16.82	27.8163	0.725751	2.2211	0.0019	0.0154399	shikimate/quinate 5-dehydrogenase, putative, expressed
LOC_Os12g39640	Chr12:24475095-24477843	7.90165	13.0629	0.725246	1.80266	0.00385	0.0265706	MYB family transcription factor, putative, expressed
LOC_Os04g39160	Chr4:23284807-23290538	5.7056	9.42944	0.724794	1.95685	0.0008	0.00773994	RNA-dependent RNA polymerase, putative, expressed
LOC_Os02g57840	Chr2:35424001-35425624	9.84993	16.2766	0.724615	1.55921	0.0071	0.0417926	remorin C-terminal domain containing protein, putative, expressed
LOC_Os05g30810	Chr5:17880778-17882248	49.8	82.2841	0.724467	2.02187	0.0004	0.0043648	expressed protein
LOC_Os02g15540	Chr2:8714094-8715055	22.9498	37.9173	0.724377	1.86788	0.00175	0.0144328	expressed protein
LOC_Os07g07820	Chr7:3914920-3921244	5.07034	8.37435	0.723896	1.68613	0.0024	0.0184335	expressed protein
LOC_Os09g36220	Chr9:20885171-20889843	16.6276	27.4545	0.723457	2.14263	0.0004	0.0043648	response regulator receiver domain containing protein, expressed
LOC_Os04g25360	Chr4:14675325-14679205	22.932	37.8637	0.723456	2.11006	0.0005	0.0052468	tRNA methyltransferase complex GCD14 subunit, putative, expressed
LOC_Os02g06390	Chr2:3191313-3194143	15.1815	25.0547	0.72276	1.66846	0.0039	0.0268612	expressed protein
LOC_Os03g18210	Chr3:10212390-10215769	4.98261	8.22214	0.722612	1.80743	0.0018	0.0147583	basic helix-loop-helix, putative, expressed
LOC_Os08g04450	Chr8:2177821-2180210	9.76151	16.1045	0.722292	1.76847	0.0027	0.0201843	DAG protein, chloroplast precursor, putative, expressed
LOC_Os01g60270	Chr1:34862486-34866145	9.6044	15.8451	0.722266	1.92871	0.0014	0.0120995	homeobox domain containing protein, expressed
LOC_Os03g01570	Chr3:356718-359721	9.21122	15.1881	0.721479	1.76421	0.0024	0.0184335	expressed protein
LOC_Os01g61230	Chr1:35430855-35432885	9.08146	14.9727	0.721334	1.5773	0.00865	0.0482447	dihydroflavonol-4-reductase, putative, expressed
LOC_Os03g09090	Chr3:4720644-4724099	8.30104	13.6798	0.720683	1.74139	0.00275	0.0204362	expressed protein
LOC_Os05g35110	Chr5:20847171-20851097	98.62	162.517	0.720641	2.12297	0.0002	0.00243581	OsFBL22 - F-box domain and LRR containing protein, expressed
LOC_Os11g43900	Chr11:26510870-26513134	1396.27	2300.57	0.720418	1.65613	0.00345	0.0244478	translationally-controlled tumor protein, putative, expressed
LOC_Os02g33710	Chr2:20109002-20112456	70.1578	115.594	0.72039	2.16934	0.00035	0.00391428	decarboxylase, putative, expressed
LOC_Os04g25440	Chr4:14742170-14744334	81.3325	133.98	0.720109	2.34312	0.00015	0.00189973	cytokinin-O-glucosyltransferase 2, putative, expressed
LOC_Os04g48710	Chr4:29042957-29046916	55.9064	92.0658	0.719652	2.16319	0.00035	0.00391428	expressed protein
LOC_Os09g38420	Chr9:22114199-22119990	5.41811	8.9187	0.719042	1.73083	0.00395	0.0271349	cysteinyl-tRNA synthetase, putative, expressed
LOC_Os02g52010	Chr2:31840426-31841847	11.7323	19.3107	0.718912	1.83006	0.00525	0.0334142	phosphate-induced protein 1 conserved region domain containing protein, expressed
LOC_Os06g42850	Chr6:25747062-25749944	13.318	21.9117	0.718328	2.09146	0.00165	0.013809	extracellular ligand-gated ion channel, putative, expressed
LOC_Os04g57600	Chr4:34272646-34276664	23.4262	38.52	0.717485	2.16158	0.00015	0.00189973	zinc finger C-x8-C-x5-C-x3-H type family protein, expressed
LOC_Os12g08260	Chr12:4209129-4216353	43.4794	71.4719	0.717046	1.85626	0.0021	0.0166061	dehydrogenase E1 component domain containing protein, expressed
LOC_Os03g61920	Chr3:35100037-35103600	27.1642	44.6437	0.716748	2.08332	0.0004	0.0043648	electron transfer flavoprotein subunit alpha, mitochondrial precursor, putative, expressed
LOC_Os03g10950	Chr3:5625732-5627797	9.30789	15.2953	0.716563	1.9782	0.0029	0.0212917	protein phosphatase 2C, putative, expressed
LOC_Os08g28670	Chr8:17510083-17511691	39.9178	65.5373	0.715286	2.08225	0.0005	0.0052468	pathogenesis-related Bet v I family protein, putative, expressed
LOC_Os02g35620	Chr2:21419920-21422365	3.54761	5.82327	0.714983	1.62746	0.00535	0.0338966	expressed protein
LOC_Os03g48380	Chr3:27546110-27550077	20.8489	34.1836	0.71333	2.0476	0.0006	0.00612607	expressed protein
LOC_Os02g01440	Chr2:261347-265491	4.88045	8.00173	0.713297	1.59539	0.0062	0.037784	nitric oxide synthase 1, putative, expressed
LOC_Os02g18450	Chr2:10739450-10749006	8.99969	14.7552	0.713278	1.98721	0.00105	0.0096341	GTP-binding protein typA/bipA, putative, expressed
LOC_Os03g10090	Chr3:5098237-5100691	114.033	186.928	0.713025	2.23155	0.0005	0.0052468	transporter family protein, putative, expressed
LOC_Os03g13390	Chr3:7228963-7231749	36.2602	59.423	0.712634	2.20884	0.00105	0.0096341	oxidoreductase, aldo/keto reductase family protein, putative, expressed
LOC_Os09g02214	Chr9:878144-890186	15.0821	24.7143	0.712507	2.02234	0.0008	0.00773994	Citrate transporter protein, putative, expressed
LOC_Os09g26880	Chr9:16330087-16338641	104.508	171.238	0.712385	2.09629	0.00035	0.00391428	aldehyde dehydrogenase, putative, expressed
LOC_Os05g51380	Chr5:29459581-29464844	5.51897	9.04186	0.712221	1.80688	0.0014	0.0120995	expressed protein
LOC_Os02g57050	Chr2:34934530-34936977	11.8893	19.4416	0.709478	1.89408	0.00205	0.01633	diphthamide biosynthesis protein, putative, expressed
LOC_Os07g32880	Chr7:19655990-19657603	13.3733	21.8679	0.709463	1.74866	0.0025	0.0190176	ATP synthase gamma chain, putative, expressed
LOC_Os06g43900	Chr6:26442594-26444898	13.3254	21.7877	0.709329	1.53527	0.00695	0.0411436	ribosomal protein L35, putative, expressed
LOC_Os06g41090	Chr6:24555312-24557973	4.59845	7.51838	0.709275	1.88536	0.0075	0.043523	anthranilate phosphoribosyltransferase, putative, expressed
LOC_Os04g46390	Chr4:27505486-27510048	294.035	480.293	0.707924	1.85334	0.00255	0.0193238	chaperone protein dnaJ, putative, expressed
LOC_Os03g44430	Chr3:25001590-25003485	6.12084	9.99439	0.707389	1.71836	0.00575	0.0356623	ubiquitin carboxyl-terminal hydrolase, family 1, putative, expressed
LOC_Os10g32540	Chr10:17040041-17047633	8.28079	13.5171	0.70694	1.98369	0.00045	0.00480686	SAP domain containing protein, expressed
LOC_Os08g33710	Chr8:21050471-21052852	79.5646	129.789	0.70597	2.35286	0.0003	0.00344573	ribonuclease T2 family domain containing protein, expressed
LOC_Os04g43030	Chr4:25460246-25468576	2.8701	4.67939	0.70522	1.60354	0.00665	0.039773	lipase class 3 family protein, putative, expressed
LOC_Os11g30810	Chr11:17943543-17945390	12.8946	21.0195	0.704958	1.68986	0.00475	0.0309602	sulfotransferase domain containing protein, expressed
LOC_Os11g36480	Chr11:21524811-21527175	17.3173	28.2263	0.704826	1.88301	0.00115	0.0103875	zinc knuckle domain containing protein, expressed
LOC_Os04g28250	Chr4:16693991-16694833	57.7016	94.0489	0.7048	2.05733	0.0012	0.0107172	cysteine proteinase inhibitor precursor, putative, expressed
LOC_Os04g08350	Chr4:4457399-4461845	134.135	218.597	0.704585	2.00292	0.0006	0.00612607	cysteine synthase, chloroplast/chromoplast precursor, putative, expressed
LOC_Os02g17650	Chr2:10155842-10164747	18.1655	29.6005	0.704419	2.00594	0.0005	0.0052468	tocopherol cyclase, chloroplast precursor, putative, expressed
LOC_Os10g14011	Chr10:7615952-7616904	34.1455	55.6155	0.703792	1.99826	0.00195	0.0157495	expressed protein
LOC_Os02g27000	Chr2:15865331-15876489	6.55756	10.6808	0.70379	1.92622	0.00115	0.0103875	ATP-binding region, ATPase-like domain containing protein, expressed
LOC_Os05g32680	Chr5:19130323-19135942	6.70978	10.9242	0.703189	1.6387	0.00505	0.0323837	PAC, putative, expressed
LOC_Os04g37619	Chr4:22369631-22376812	9.69551	15.7843	0.703099	1.88937	0.00085	0.00814427	zeaxanthin epoxidase, chloroplast precursor, putative, expressed
LOC_Os03g63850	Chr3:36073171-36074582	19.6151	31.9309	0.702989	2.05775	0.0022	0.0172309	OsFBDUF19 - F-box and DUF domain containing protein, expressed
LOC_Os04g48950	Chr4:29194393-29197172	6.35563	10.3383	0.70189	1.93468	0.00425	0.0287071	fringe-related protein, putative, expressed
LOC_Os06g29310	Chr6:16732923-16745662	12.0017	19.5213	0.701811	1.98148	0.00065	0.00656619	ulp1 protease family protein, putative, expressed
LOC_Os01g09300	Chr1:4726658-4731243	38.5397	62.673	0.7015	2.0828	0.0004	0.0043648	oxidoreductase, putative, expressed
LOC_Os01g56890	Chr1:32855274-32858101	36.5343	59.4082	0.701411	1.98772	0.00095	0.00888084	expressed protein
LOC_Os07g01030	Chr7:17514-21408	7.03405	11.4338	0.70088	1.71454	0.00375	0.0260313	glycosyl transferase, group 1 domain containing protein, expressed
LOC_Os06g07923	Chr6:3852138-3854472	76.3366	124.046	0.70043	2.47675	0.00015	0.00189973	expressed protein
LOC_Os04g57739	Chr4:34393143-34396573	10.6686	17.3264	0.699601	1.63247	0.008	0.0455149	expressed protein
LOC_Os03g56280	Chr3:32086000-32089685	59.8319	97.0673	0.698069	2.06588	0.0004	0.0043648	lactate/malate dehydrogenase, putative, expressed
LOC_Os03g58920	Chr3:33546462-33551064	4.22819	6.85448	0.697006	1.65765	0.0046	0.0302558	galactosyltransferase family protein, putative, expressed
LOC_Os09g15320	Chr9:9357954-9362416	17.1342	27.7577	0.696012	1.67492	0.00435	0.0291019	ubiquitin-conjugating enzyme, putative, expressed
LOC_Os10g31500	Chr10:16500659-16501740	88.4422	143.265	0.695883	2.55516	0.0008	0.00773994	retrotransposon protein, putative, unclassified, expressed
LOC_Os02g35020	Chr2:21014446-21017951	9.38281	15.191	0.69513	2.11604	0.00305	0.0221945	glycosyl transferase, putative, expressed
LOC_Os01g18220	Chr1:10200475-10203694	8.75123	14.1638	0.694653	1.78735	0.00555	0.0347386	expressed protein
LOC_Os01g16146	Chr1:9114576-9117425	59.7461	96.6949	0.694595	2.17148	0.0008	0.00773994	phenazine biosynthesis protein, putative, expressed
LOC_Os06g04620	Chr6:2017777-2019458	54.3514	87.871	0.693071	2.27486	0.00065	0.00656619	GDP-mannose 4,6 dehydratase 2, putative, expressed
LOC_Os01g16180	Chr1:9159605-9165693	12.8384	20.7544	0.692947	2.05717	0.00025	0.00295117	MT-A70 domain containing protein, expressed
LOC_Os04g52850	Chr4:31474373-31477433	21.8891	35.3835	0.692864	1.95948	0.00045	0.00480686	OTU-like cysteine protease family protein, putative, expressed
LOC_Os02g37090	Chr2:22426233-22428905	7.21242	11.6576	0.692715	1.65325	0.0051	0.032634	hydrolase, alpha/beta fold family domain containing protein, expressed
LOC_Os04g51240	Chr4:30361877-30363658	37.8546	61.1234	0.691256	1.94754	0.00165	0.013809	EF hand family protein, putative, expressed
LOC_Os01g04020	Chr1:1746415-1748549	169.725	273.914	0.690522	2.11144	0.00055	0.00566905	AP2 domain containing protein, expressed
LOC_Os08g45010	Chr8:28250418-28254009	90.3844	145.626	0.688119	2.02641	0.0003	0.00344573	ABC transporter, ATP-binding protein, putative, expressed
LOC_Os05g39990	Chr5:23495605-23497572	20.8378	33.5665	0.687821	2.04565	0.0022	0.0172309	expansin precursor, putative, expressed
LOC_Os04g35880	Chr4:21863860-21867815	9.58633	15.441	0.68772	1.82501	0.00215	0.0169396	retrotransposon protein, putative, unclassified, expressed
LOC_Os03g05420	Chr3:2676952-2682168	7.78421	12.5376	0.687642	1.89588	0.0011	0.010008	MT-A70 domain containing protein, expressed
LOC_Os01g34610	Chr1:19079247-19083485	5.89226	9.48331	0.686569	1.61644	0.00655	0.039343	expressed protein
LOC_Os08g44400	Chr8:27938210-27941161	8.33726	13.4082	0.685475	1.5158	0.00895	0.049443	glutathione S-transferase, N-terminal domain containing protein, expressed
LOC_Os12g02200	Chr12:679073-682269	10.3751	16.6835	0.685299	1.87795	0.0014	0.0120995	CAMK_KIN1/SNF1/Nim1_like.6 - CAMK includes calcium/calmodulin depedent protein kinases, expressed
LOC_Os07g02800	Chr7:1046016-1048052	18.1837	29.2315	0.684873	1.95929	0.00125	0.0110436	MYB family transcription factor, putative, expressed
LOC_Os05g07860	Chr5:4243549-4246859	44.3741	71.3198	0.684584	2.02016	0.0005	0.0052468	uvrB/uvrC motif family protein, expressed
LOC_Os05g02530	Chr5:876949-880628	80.5767	129.458	0.684048	2.03561	0.00075	0.00738829	glutathione S-transferase, N-terminal domain containing protein, expressed
LOC_Os03g60920	Chr3:34614570-34616975	17.8022	28.6009	0.684007	1.78267	0.00175	0.0144328	Methyltransferase small domain containing protein, expressed
LOC_Os05g43560	Chr5:25321294-25330864	19.1547	30.769	0.683775	1.98081	0.00085	0.00814427	AGAP007115-PA, putative, expressed
LOC_Os05g25060	Chr5:14498741-14506826	4.05861	6.51918	0.683705	1.71414	0.0044	0.0292719	PPR repeat domain containing protein, putative, expressed
LOC_Os05g09440	Chr5:5293554-5297419	11.5974	18.6269	0.683586	1.85652	0.0018	0.0147583	NADP-dependent malic enzyme, chloroplast precursor, putative, expressed
LOC_Os07g03240	Chr7:1281378-1285075	15.1268	24.2775	0.682513	1.82534	0.00205	0.01633	RNA recognition motif containing protein, putative, expressed
LOC_Os04g34620	Chr4:20949613-20952806	18.0229	28.9248	0.682479	1.91423	0.0013	0.0113923	expressed protein
LOC_Os04g38970	Chr4:23148229-23151738	6.93296	11.1147	0.680927	1.6448	0.00435	0.0291019	protein binding protein, putative, expressed
LOC_Os01g02930	Chr1:1078510-1081702	17.1949	27.5632	0.680765	2.16452	0.0017	0.0141133	glycosyltransferase protein, putative, expressed
LOC_Os02g13370	Chr2:7126756-7133480	12.15	19.4701	0.680302	1.68278	0.0037	0.0257669	expressed protein
LOC_Os02g48390	Chr2:29625455-29628118	42.0372	67.3573	0.680165	2.05928	0.00035	0.00391428	phosphoribosyl transferase, putative, expressed
LOC_Os02g04160	Chr2:1816289-1819094	49.4617	79.2148	0.67946	1.92073	0.00115	0.0103875	transcription elongation factor 1, putative, expressed
LOC_Os04g31120	Chr4:18602663-18610312	15.6354	25.0343	0.679095	1.85053	0.0016	0.013514	OsFBK14 - F-box domain and kelch repeat containing protein, expressed
LOC_Os02g30320	Chr2:18058920-18060113	27.5259	44.0686	0.678959	1.86195	0.0018	0.0147583	drought-induced protein 1, putative, expressed
LOC_Os03g12000	Chr3:6286010-6288451	6.23637	9.98337	0.678819	1.65166	0.00535	0.0338966	DEAD-box ATP-dependent RNA helicase, putative, expressed
LOC_Os01g34080	Chr1:18763269-18774476	3.64889	5.84085	0.67872	1.64901	0.00525	0.0334142	armadillo/beta-catenin-like repeat family protein, expressed
LOC_Os07g07040	Chr7:3469426-3471635	41.0684	65.7289	0.678498	2.06716	0.00045	0.00480686	erythrocyte binding protein 3, putative, expressed
LOC_Os02g04230	Chr2:1850953-1858237	8.53879	13.6612	0.677982	1.76382	0.00345	0.0244478	CGMC_MAPKCMGC_2.7 - CGMC includes CDA, MAPK, GSK3, and CLKC kinases, expressed
LOC_Os04g41560	Chr4:24647900-24649396	72.0059	115.172	0.6776	2.27905	0.00055	0.00566905	B-box zinc finger family protein, putative, expressed
LOC_Os05g45710	Chr5:26480055-26481404	30.5435	48.8407	0.677221	2.18451	0.00115	0.0103875	serine acetyltransferase protein, putative, expressed
LOC_Os12g07060	Chr12:3455588-3463158	19.5526	31.2643	0.677155	1.94601	0.0012	0.0107172	chaperone protein dnaJ, putative, expressed
LOC_Os06g13570	Chr6:7488065-7496669	5.32776	8.51738	0.676882	1.61414	0.00565	0.0351887	expressed protein
LOC_Os03g61120	Chr3:34715395-34721075	5.45519	8.72026	0.676741	1.61766	0.0039	0.0268612	anthranilate synthase component I-1, chloroplast precursor, putative, expressed
LOC_Os02g37880	Chr2:22892267-22897444	11.9991	19.1806	0.676719	1.917	0.0009	0.00853065	cyclin G-associated kinase, putative, expressed
LOC_Os04g53190	Chr4:31669054-31674598	75.5267	120.71	0.676489	2.00269	0.0003	0.00344573	CPuORF12 - conserved peptide uORF-containing transcript, expressed
LOC_Os07g39260	Chr7:23502913-23504391	15.1743	24.2483	0.676256	1.80156	0.00325	0.0233502	expressed protein
LOC_Os02g05810	Chr2:2865047-2869033	3.80926	6.07759	0.673988	1.60849	0.0055	0.0345254	expressed protein
LOC_Os10g36980	Chr10:19810179-19812075	19.8927	31.7323	0.673712	2.29999	0.0013	0.0113923	transposon protein, putative, unclassified, expressed
LOC_Os06g06720	Chr6:3145465-3147618	16.3449	26.0634	0.673183	1.77246	0.00325	0.0233502	flavonol synthase/flavanone 3-hydroxylase, putative, expressed
LOC_Os08g38880	Chr8:24575561-24579358	13.6352	21.7361	0.672757	1.87023	0.0016	0.013514	WD-40 repeat family protein, putative, expressed
LOC_Os03g13840	Chr3:7500133-7503970	10.8353	17.2664	0.672223	1.84065	0.0028	0.0207301	senescence-associated protein, putative, expressed
LOC_Os09g28690	Chr9:17447932-17449592	10.8503	17.2836	0.671668	1.80512	0.0065	0.0391216	gibberellin receptor GID1L2, putative, expressed
LOC_Os02g37000	Chr2:22347062-22348185	15.6936	24.9965	0.671551	1.92512	0.0065	0.0391216	mitochondrial prohibitin complex protein 1, putative, expressed
LOC_Os06g14510	Chr6:8152234-8159385	40.4923	64.4799	0.671202	2.03921	0.00065	0.00656619	glucose-6-phosphate isomerase, putative, expressed
LOC_Os03g57349	Chr3:32715317-32716309	49.2708	78.3958	0.670042	2.01659	0.0015	0.0128149	expressed protein
LOC_Os06g30380	Chr6:17550088-17553470	5.17528	8.23246	0.669687	1.62493	0.0057	0.0354445	GTP binding protein, putative, expressed
LOC_Os08g35880	Chr8:22634263-22638400	8.16045	12.9728	0.668771	1.65791	0.00455	0.0300765	OsFBX294 - F-box domain containing protein, expressed
LOC_Os03g07850	Chr3:3990104-3997815	5.3214	8.45106	0.667326	1.55941	0.0066	0.0395934	tRNA methyltransferase, putative, expressed
LOC_Os02g45090	Chr2:27352068-27357013	10.6923	16.9689	0.666318	1.70806	0.003	0.021911	expressed protein
LOC_Os12g01290	Chr12:165072-169377	7.4129	11.7586	0.665613	1.74737	0.0028	0.0207301	ulp1 protease family protein, putative, expressed
LOC_Os05g04180	Chr5:1885037-1889261	8.96063	14.2087	0.665103	1.55341	0.0083	0.0467747	agenet domain containing protein, putative, expressed
LOC_Os06g30750	Chr6:17836885-17840919	167.694	265.821	0.664628	1.91941	0.00085	0.00814427	reticulon domain containing protein, putative, expressed
LOC_Os05g29676	Chr5:17149338-17152306	16.9641	26.8618	0.663069	1.69347	0.00805	0.0457447	RING-H2 finger protein, putative, expressed
LOC_Os03g09970	Chr3:4984576-4992411	8.29329	13.1285	0.662686	1.63674	0.0049	0.0317208	sulfate transporter, putative, expressed
LOC_Os12g39840	Chr12:24627826-24630949	16.0467	25.3961	0.662329	1.82391	0.00225	0.0175648	expressed protein
LOC_Os06g42720	Chr6:25690096-25693908	380.663	602.392	0.662188	1.5658	0.00645	0.0389289	amino acid transporter, putative, expressed
LOC_Os02g13600	Chr2:7300531-7301673	18.9748	29.9925	0.660515	2.10678	0.00805	0.0457448	expressed protein
LOC_Os05g43840	Chr5:25489314-25491603	15.4516	24.4199	0.660303	1.88541	0.0015	0.0128149	CAMK_KIN1/SNF1/Nim1_like.25 - CAMK includes calcium/calmodulin depedent protein kinases, expressed
LOC_Os03g03460	Chr3:1494307-1497245	33.2847	52.5999	0.660202	2.00112	0.00105	0.0096341	erythronate-4-phosphate dehydrogenase, putative, expressed
LOC_Os02g54980	Chr2:33688349-33690488	24.5197	38.7337	0.659645	2.08859	0.0018	0.0147583	pheophorbide a oxygenase, chloroplast precursor, putative, expressed
LOC_Os05g41220	Chr5:24137574-24141002	27.6849	43.7268	0.659417	1.94006	0.0009	0.00853065	SNF1-related protein kinase regulatory subunit beta-1, putative, expressed
LOC_Os01g10400	Chr1:5478475-5479836	256.932	405.798	0.659377	1.97068	0.0007	0.00697948	expressed protein
LOC_Os02g43770	Chr2:26409639-26412101	6.47999	10.2292	0.658627	1.73221	0.00815	0.0461917	DUF630/DUF632 domains containing protein, putative, expressed
LOC_Os01g09020	Chr1:4534020-4540216	19.4853	30.7469	0.65806	1.93671	0.0012	0.0107172	WD domain, G-beta repeat domain containing protein, expressed
[truncated: 2,063 more rows]
